# Supplementary material for: Neuroinflammation and ALS: Transcriptomic Insights into Molecular Disease Mechanisms and Therapeutic Targets
Source: Hindawi journal article supplement (doi:10.1155/2017/7070469), 2017-01-01
Supplement: f1 [file 7070469.f1.pdf]

## Neuroinflammation and ALS: Transcriptomic Insights into Molecular Disease Mechanisms and Therapeutic Targets

Giovanna Morello<sup>a</sup>, Antonio Gianmaria Spampinato<sup>a</sup> and Sebastiano Cavallaro<sup>a,\*</sup>

<sup>a</sup> *Institute of Neurological Sciences, Italian National Research Council, Catania, Italy.*

\*Corresponding author: Sebastiano Cavallaro, M.D., Ph.D., Institute of Neurological Sciences

(ISN), CNR, Via Paolo Gaifami, 18, 95125 Catania, Italy. Phone: +39.095.7338111; Fax:

+39.095.7338110; E-mail: [sebastiano.cavallaro@cnr.it](mailto:sebastiano.cavallaro@cnr.it)

## Supplementary Information

### Supplementary Discussion

In the following paragraphs, we will provide a detailed analysis of inflammatory and immunological pathways affected in SALS, focusing attention on potential biomarkers and pharmacological targets for the development of more efficacious and individualized therapeutic interventions for ALS patients.

#### Antigen processing and presentation

Antigen processing and presentation is the process by which antigen-presenting cells (APCs), such as dendritic cells, macrophages and B cells, express antigen on their cell surface in a form recognizable by T lymphocytes and other immune-related cells. Previous evidence showed that dysregulation of genes related to the antigen-processing machinery seems to account for a number of intercellular mechanisms that are able to amplify the harmful non-autonomous cell toxicity in ALS animal models [1]. Consistent with this scenario, we observed deregulated expression of several genes encoding proteins involved in antigen processing and presentation as well as in the activation/modulation of adaptive immunity, mainly in SALS2 patients (Supplementary Figure 1).

Among these genes, we distinguish those involved in the formation and regulation of the proteasome system, the main intracellular proteolytic mechanism controlling protein turnover and the selective degradation of misfolded/abnormal proteins (Supplementary Figure 1) [2]. The accumulation of abnormal protein aggregates into damaged neurons represents a common hallmark in multiple neurodegenerative diseases, including ALS, and altered expression of multiple proteasome subunits was widely documented in both patients and animal models of ALS [3, 4]. In addition, other proteases implicated in antigen generation and/or trimming (TPP2, NPEPPS, BLMH, NRD1, THOP1, SPC, PC7 and IMPAS-1), were found deregulated in SALS patients, sustaining the involvement of a dysfunction in protein turnover and ubiquitin–proteasome pathways

in ALS (Supplementary Figure 1). In particular, NPEPPS has been recently identified as a major peptidase acting on neurotoxic protein substrates, including SOD1, and its expression was found significantly decreased in motor neurons of both ALS transgenic mice and patients, supporting its role in the disease pathogenesis [5]. Low expression levels of the gene encoding nardilysin convertase (*NRD1*) in SALS2 patients (Supplementary Figure 1) are in line with the evidence that the loss of this metalloendopeptidase in neurons leads to impaired motor activities and cognitive deficits by altering axonal maturation and myelination in the CNS [6]. Overexpression of *IMPAS-1* in SALS patients is supported by several studies that correlate high levels of this protease with the aberrant autophagic activity associated with numerous neurodegenerative diseases [7].

Several molecular chaperones have been already extensively implicated in the pathogenesis of ALS, playing an essential role in the folding and maturation of proteins [8]. Consistent with our results, deregulated levels of HSP70, HSP90 and their interacting protein CHIP were previously detected in the serum of FALS patients, suggesting that deregulation of this protein system may reflect the degeneration of motor neurons in both forms of the disease [9]. Interestingly, recent studies have reported that treatments with arimoclomol, a strong co-inducer of HSPs, significantly delays disease progression in ALS animal models, supporting it as a potentially efficacious therapy for ALS.

Antigen presentation is mediated by the major histocompatibility complex (MHC) class I and class II molecules that are responsible to deliver short peptides to the APC surface for recognition by CD8+ (cytotoxic) and CD4+ (helper) T cells, respectively. The main difference between these molecules is that the MHC class I pathway is usually fueled by endogenous antigen, while exogenous peptides reach the MHC class II pathway. SALS patients showed deregulated expression of genes encoding MHC class I and II molecules and different components of the peptide-loading complex (TAP1, TAP2, TPSN, PDIA3, CALR, CANX, UGCGL1, BCAP31, B2M, ENPL, COPII, BCAP31, ERAP1) (Supplementary Figure 1). Genes encoding MHC molecules were found to be differentially expressed in SALS patients, supporting previous findings that reported a dual activity of neuronal MHC in ALS-affected tissues [10]. In fact, although MHC seems to play an essential role in preserving the maximal efficiency of motor axon connectivity with target muscles, a marked activation of this molecular complex was associated with enhanced infiltration of immune cells in the CNS of ALS animal models at the onset and during disease progression [11]. Moreover, activated microglia and astrocytes, present in ALS and other neurodegenerative diseases, showed increased expression of MHC-class II molecules, promoting the release of nitric oxide and other soluble factors that enhance inflammatory response [12]. The pharmacological inhibition of MHC I expression by immunomodulatory agents, such as glatiramer acetate, has shown neuroprotective effects in several neurological conditions, including ALS [13].

*T-cell-antigen recognition.* The presentation of antigen in the context of MHC molecules serves as a signal to trigger T cell activation and initiate an immunogenic cascade that leads to cytolysis of the APCs. A global dysregulation of T-cell functions has been related to an increased disease progression, decreased survival as well as production of pro-inflammatory effectors in experimental ALS [14, 15]. Abnormalities in T lymphocytes were also found in the blood of ALS patients, although there are differences among studies that may be explained by the heterogeneity of the ALS cohorts and the limited numbers of patients examined [14, 16, 17]. Accordingly, we found that a significant number of membrane protein-encoding genes involved in T cell activation and proliferation (*CAVI*, *TRIM1*, *TOLLIP*, *DPP4/CD26*, *CD4*, *MIC2*, *CD45*, *ICOS*, *ICOS-L*) were differentially deregulated in SALS patients (increased in SALS1 and decreased in SALS2) (Supplementary Figure 1). Among these, decreased expression of *CD4* is in line with previous evidence demonstrating that the genetic depletion of *CD4* or, more generally, a lack of functional T cells accelerates motor neuron degeneration and diminishes the survival of ALS transgenic mice, confirming a neuroprotective role of CD4+ T cells in ALS [15]. Reduced expression of *CAVI* was associated with alterations of lymphocyte trafficking and synaptic transmission in the CNS, contributing to increased risk of neurodegenerative and age-related disorders [18, 19]. SALS1

patients showed an increased expression of the gene encoding CD99 (*MIC2*), a leukocyte surface glycoprotein involved in several biological processes, including the regulation of T cell activation and development (Supplementary Figure 1) [20]. Pharmacological studies showed that CD99 blockade *in vivo* decreases the accumulation of CNS inflammatory infiltrates, supporting the role of this protein as a possible target for controlling neuroinflammatory events [21]. Another potential therapeutic target for CNS inflammation is represented by the CD45 tyrosine phosphatase, whose expression levels were increased in the spinal cord of ALS mice as well as in activated microglial cells of murine models of other neurodegenerative diseases, including Alzheimer's (AD) [22-24].

**Natural Killer-cell-antigen recognition.** Natural Killer (NK) cells are activated by a range of soluble factors, including cytokines and type I interferons, but also by direct cell-to-cell contact between NK cell receptors and target cell ligands. Contrary to T cells, NK cells recognize MHC I molecules using cell inhibitory receptors (i.e., KIRs, KLRs and NKG2A), leading to inhibition of NK cell activities [25-27]. Although further investigation is required to understand the role of NK cells and their receptors in ALS, previous studies have demonstrated significant infiltrations of NK cells in the spinal cord of ALS patients and the consequent inhibition of neuroprotective T-cell responses [14, 28]. In our study, we found differential expression of some genes encoding NK inhibitory receptors (*NKG2A*, *KIR2DS1*, *KIR2DS2* and *KLR11*) in SALS patients, indicating the dysfunctions in NK cell-mediated functions may be implicated in the immunopathogenesis of various neurodegenerative diseases, including ALS (Supplementary Figure 1) [29, 30]. In accordance with our results, increased expression of *NKG2A* was previously reported in PD patients, suggesting that high levels of this receptor may induce a chronic antigen-driven stimulation and dysregulated cytokine production, contributing to inflammatory and neurodegenerative events [31].

**B-cell-antigen recognition.** B cells recognize a specific antigen and initiate immune response through the B cell antigen receptor (BCRs) complex consisting of an antigen-binding subunit (the membrane immunoglobulin) and a signaling subunit, which is composed of a disulfide-linked heterodimer of Ig- $\alpha$  (CD79A) and Ig- $\beta$  (CD79B) proteins [32]. Compelling evidence supports an important role of B cells in the pathogenesis of various neurological conditions, including ALS, not only as precursors of antibody-producing cells, but also as important regulators of the T-cell activation process through their participation in antigen presentation and cytokine production [33, 34].

Our results showed differential expression of genes encoding a component of BCR complex (CD79A) and some B cell co-receptors (Fc $\gamma$ RIIB, ITGB1, CD45, CRACM1) in SALS2 patients (Supplementary Figure 1). Low expression levels of CD79 complex and various B cell regulators were also detected in PD patients and seem to be related to aberrant protein glycosylation and folding in the endoplasmic reticulum [35]. Decreased expression of Fc $\gamma$ RIIB or its non-functional variants was associated with the development of inflammatory autoimmune diseases and Fc $\gamma$ RII-deficient mice showed an impaired development of Purkinje neurons and poor rotarod performance [36-38]. In accordance with our results, up-regulated expression of *CRACM1* seems to be associated with excessive neuronal Ca<sup>2+</sup> signaling and excitability, thus contributing to the pathogenesis of several neurological diseases, such as epilepsy, AD and Huntington's [39, 40].

### **Immune and inflammatory signaling cascades**

Accumulating evidence indicates that many neurodegenerative diseases, including ALS, are characterized by the massive activation and proliferation of microglia and astrocytes as well as the accumulation of infiltrating blood-derived immune cells (i.e., T lymphocytes and NK cells) at the sites of neurodegeneration, playing critical functions during the disease course. Moreover, signs of activation of the innate and humoral immune response were largely described in both ALS transgenic animal models and in the spinal cord and cortex of ALS patients [41]. In accordance with these studies, we observed differential expression of multiple components of intracellular signaling pathways regulating innate and adaptive immune responses in SALS patients (Supplementary

Figure 2). Interestingly, the majority of these signaling cascades were increased in SALS1 and reduced in SALS2 patients, suggesting that diverse subgroups of ALS patients may respond differentially to therapies targeting innate and adaptive immune responses (Figure 4b).

***Immunoreceptor signaling.*** Once activated, antigen receptors induce a complex series of signaling events that are fundamental for various immune functions, including cell activation, proliferation, gene transcription, cytokine secretion and clonal deletion, determining the direction of immune responses. Among neuroinflammatory DEGs in SALS patients, we distinguish the altered expression of some components of the Syk and Src family kinases (*LCK*, *LYN*, *FYN*, *SYK* and *ZAP70*) and their regulators (*SHP1* and *SHP2*), which represent the first signaling molecules to be activated downstream of immune cell-specific receptors (Supplementary Figure 2). The biological functions of these inflammatory mediators are diverse and include immune cell-receptor signaling, CNS myelination, cell division and adhesion, platelet function, synaptic activity and plasticity. In accordance with our findings, lack of Syk and Src-family kinases has been associated to defects in actin polymerization and remodeling at the immune synapse [42]. In particular, decreased expression of *FYN* induces a reduction in brain myelination and structural defects in synapses and dendritic spines [43]. Moreover, deregulated expression of *FYN* and *LCK* was associated with AD pathology, and several drugs that aimed at maintaining the physiological functions of the Syk and Src family kinases (e.g., saracatinib or AZD0530) are currently under study for the treatment of this disease [43, 44]. Also, *ZAP70* was increased in AD patients, suggesting that activated *ZAP70* may induce neuronal death through calcium-induced lymphocyte apoptosis and/or aberrant immune responses [45]. In SALS2, we also observed decreased expression of *SYK* together with the altered expression of two protein tyrosine phosphatases, *SHP-1* and *SHP-2*, supporting their involvement in protecting neurons from genotoxic or oxidative insults responsible for neuronal degeneration [46-49]. Together, protein kinase and phosphatase cascades impinge on multiple downstream signaling pathways which have broad effects on gene transcription (ERK/MAPK), apoptosis regulation (AKT),  $\text{Ca}^{2+}$  mobilization (PLC- $\gamma$ ; PKC) and cytoskeletal function modulation (Vav/Rac/Rho and AKT), representing critical events for immune activation and inflammatory cytokine/cytolytic enzyme production.

***MAPK/ERK signaling.*** Mitogen-activated protein kinases (MAPKs) are serine-threonine kinases that are activated in response to different types of oxidative stress and inflammatory conditions, and mediate intracellular signaling associated with a variety of cellular activities, including cell proliferation, differentiation, survival and death [50]. Signal transduction via this cascade is usually initiated by activating multifunctional intracellular molecules, including guanine nucleotide exchange factors and small G proteins, which induce the sequential activation of numerous protein kinases, leading to the phosphorylation and activation of transcription factors, such as c-Jun, ATF/CREB, and p53.

In our study, we found increased mRNA expression of several components of the MAPK family (MKK4, MEK1/2, MEK3, ERK1/2, p38, and JNK) and differential expression of some of their upstream activators (Grb2, SOS, VAVs, K-RAS, H-RAS, Tiam1, CDC42, Rac1 and RhoA) in both SALS subgroups (Supplementary Figure 2). Consistent with our results, several lines of evidence demonstrated that compromised MAPK signaling pathway plays a critical role in the pathogenesis of diverse human diseases, including cancer and neurodegenerative disorders, such as ALS [51]. In fact, aberrant expression and persistent activation of p38, ERK and JNK1 have been implicated in ALS pathogenesis through various mechanisms, such as the formation of abnormal intracellular inclusions, alterations in axonal transport and cytoskeletal remodeling, and the induction of motor neuron cell death [52-54]. Interestingly, the p38 MAPK inhibitor SB203580 protects motor neurons and proximal axons from excitotoxin-induced degeneration, prolonging survival of ALS mice [55].

Dysregulation of MAPK pathway upstream regulators was reported in a variety of neuronal traumas and neurodegenerative diseases, including ALS. Among these, RHOA, a member of the Rho GTPase family, plays an important role in neuronal cell survival and death by transducing

extracellular signals to the cytoskeleton [56]. In accordance with our data, low expression levels of *RHOA* were also detected in spinal cord motor neurons from SOD1-related ALS patients [57]. In addition, disruptions in Rac signaling have been identified as an underlying factor in the progression of early onset forms of ALS [58]. Differential expression of mRNA and protein levels of the adapter protein Grb2 were previously found in both pre-symptomatic and early symptomatic ALS mice, suggesting its potential role as a candidate for ALS biomarkers [59].

*PI3K/AKT/mTOR pathway.* In the nervous system, activation of the PI3K signaling and its downstream effectors, AKT and mTOR, is specifically involved in diverse cellular behaviors, including proliferation, survival, metabolism, trafficking, immunity and energy homeostasis [60]. Our findings showed decreased expression of genes encoding components of PI3K, AKT and mTOR signaling cascades in both SALS patient subgroups (Supplementary Figure 2). In line with this, recent studies reported a lack or a reduction of PI3K/Akt/mTOR protein levels in spinal cord motor neurons of asymptomatic ALS mice, suggesting that modifications of this signaling pathway may represent a potential risk for motor neuron cell death [59, 61]. In particular, reduced protein expression and phosphorylation of mTOR and its downstream signaling components seem to adversely affect the establishment, maintenance and functionality of neural networks, thus contributing to neuronal degeneration and abnormal neural development [62]. In this regard, recent studies have suggested that activation of PI3K/AKT/mTOR pathways may represent an effective therapeutic strategy to prevent or slow the progression of motor neuron degeneration [56].

*PLC- $\gamma$ /PKC signaling pathway.* Calcium signaling plays an important functional role in motor neurons, and excessive calcium release from intracellular stores seems to be responsible for the selective vulnerability of motor neurons in ALS [63]. PLC signaling is one of the principal mechanisms of maintaining calcium homeostasis in neurons. Activated PLC leads to the formation of two second messengers: IP<sub>3</sub>, which causes the release of calcium ions from intracellular stores, and DAG that activates PKC, promoting the phosphorylation and activation of calcium/calmodulin-dependent protein kinases and phosphatases as well as transcription factors involved in the production of pro-inflammatory cytokines and growth factors [64].

In our study, deregulated expression of genes encoding various components of the PLC- $\gamma$ /PKC signaling cascade was detected in both SALS patient subgroups (Supplementary Figure 2). These findings are corroborated by previous studies reporting an abnormal activity or expression of PLC- $\gamma$  and PKC in the spinal cord of ALS patients that results in higher cytoplasmic calcium concentrations, leading to the inhibition of MAPK and cytokine/chemokine signaling and activation of ER stress response observed in ALS [65, 66]. Moreover, the pharmacological inhibition or genetic removal of PLC- $\gamma$  prolongs survival of ALS animal models, indicating this signaling as a potential target for ALS therapy [67].

*RAGE /TLR Signaling Pathway.* Toll-like receptor (TLR) and receptor for advanced glycation end products (RAGE) are among the major components of the innate immune system. They are able to induce and/or amplify inflammatory reactions and were extensively implicated in ALS pathology [68]. TLRs initiate signaling cascades through recognition of a variety of molecules released by the injured tissue, such as endogenous HSPs and HMGB1, a potent proinflammatory cytokine-like mediator that, interacting also with RAGE receptors, coordinates cellular stress responses and plays a critical role in several cellular processes, including cell migration, neuronal growth and apoptotic cell death [69]. Activation of RAGE/TLR signaling pathways results in the sequential stimulation of several downstream effectors and transcription factors, which induce production and release of various proinflammatory mediators (i.e., cytokines, chemokines, NO and cell adhesion molecules), exacerbating the inflammatory response and subsequently leading to neuronal damage and apoptosis.

In our study, both SALS subgroups showed up-regulation of genes encoding various TLRs (TLR2, TLR4, TLR6, TLR10), while decreased expression of HMGB1/RAGE systems was specifically detected in SALS2 patients (Supplementary Figure 2). In line with this, previous studies revealed consistent up-regulation of TLRs and HMGB1/RAGE reduction in glial cells and

degenerating spinal cord motor neurons of patients and animal models of ALS [70-72]. In addition, it was shown that TLRs antagonism, as well as restoration of RAGE signals, exert neuroprotective effects in ALS pathology, significantly extending survival and improving motor functions in a mouse model of ALS [73-75]. Altogether, these results demonstrate that activation of these signaling pathways may contribute to motor neuron injury in ALS and suggest that their pharmacological inhibition may represent an effective therapeutic strategy to attenuate neurodegenerative processes.

Among various transcription factors that are activated by the TLR signaling cascade, NF- $\kappa$ B plays a role of fundamental importance in various cellular mechanisms, including the immune response, cytokine production, cellular responses to oxidative stress and synaptic plasticity. Decreased expression of *NF- $\kappa$ B* was found in SALS1, while increased expression of this gene was detected in SALS2 (Supplementary Figure 2). This discrepancy may be explained by the fact that, while low levels of NF- $\kappa$ B have been associated with a decreased neuroprotection, high levels of this protein complex might be responsible for microglial activation occurring during neuroinflammatory responses [76]. Moreover, although preclinical studies reported contrasting results, several NF- $\kappa$ B pharmacological inhibitors have shown neuroprotective effects in ALS, mainly by preventing apoptotic cell death, inflammation and oxidative damage as well as improving mitochondrial function [77].

### **Complement system**

The complement system represents a bridge between innate and adaptive immune responses, participating in the recognition, trafficking and elimination of pathogenic microorganisms [78]. This enzymatic cascade consists of more than 30 different proteins, membrane-bound receptors and a series of complement regulatory proteins, such as clusterin, DAF and CD59 [79]. Depending on the activation trigger, the complement cascade can be activated through three pathways (classical, lectin or alternative) that converge into the production of bioactive peptides that can mediate a variety of pro-inflammatory responses.

Complement activation in the CNS exerts a physiological role in recognizing and eliminating apoptotic and necrotic cells, but erroneous activation or insufficient regulation of this system seems to play a role in the pathogenesis of several autoimmune and neurological diseases, including ALS [80-83]. Numerous clinical and animal studies have in fact demonstrated the presence of high mRNA and protein levels of members of the complement pathway in the serum, cerebrospinal fluid and neurological tissues (spinal cord and motor cortex) of ALS patients and animal models, suggesting that a complement-driven immune response might contribute to motor neuron injury [84].

Our analysis is largely supportive of the involvement of the complement system in ALS, revealing differential expression of numerous complement components, regulators and receptors in SALS patients (Supplementary Figure 3). In particular, when compared to controls, SALS1 patients showed increased mRNA levels of several serine proteases, constituting integral elements of the classical complement cascade (including C1s, C3/C3a-c, iC3b, C3dg and C4/C4a-b) and deregulated expression of some of their membrane receptors (CD21, CR1g and CR3 - also known as  $\alpha_M\beta_2$ -integrin) (Supplementary Figure 3). The lectin-induced and alternative complement pathways, instead, were mainly deregulated in SALS2, with increased mRNA levels of MASP-1 and complement factors B, D, H and I (Supplementary Figure 3). Down-regulated expression of C3 and C5 convertases was found in SALS1 patients, confirming that genetic mutations or altered assembly and activity of C3/C5 convertases can result in dysregulation of the alternative complement pathway [85]. Moreover, both SALS subgroups showed deregulated expression of complement regulatory/inhibitory molecules, including clusterin, properdin, DAF and CD59, in agreement with the observation that altered levels of these molecules could confer to neurons an increased susceptibility to complement-based lysis as well as damage from recruited immune cells (Supplementary Figure 3) [83].

It is interesting to note that increased levels of complement activation products have been detected in ALS animal models before the appearance of motor symptoms, remaining detectable at the symptomatic stage, suggesting that complement activation may precede neurodegeneration and play an early role in ALS pathogenesis. This could pave the way for new diagnostic markers as well as more personalized and targeted therapeutic approaches. In this regard, inhibition or modulation of the complement system has been recognized as a promising strategy in drug discovery for several inflammatory-related conditions, including ALS, PD and AD, even if suppressing pathogenic complement activity without compromising its defensive and immunomodulatory functions still remains a big challenge [83, 86, 87]. Further experiments are thus needed to better clarify the roles of the complement pathway in the ALS progression as well as its implication in diagnosis and targeted treatments for this disease.

### **Cytokine signaling**

Cytokines are a class of small proteins, comprising [chemokines](#), [interferons](#) (IFNs), [interleukins](#) (ILs), [lymphokines](#), and growth factors (like VEGF, TGF- $\beta$ , TNFs), which act as signaling molecules to regulate acute and chronic inflammation and modulate cellular activities such as growth, survival, and differentiation. Cytokines exert their functions by interacting with their receptors and activating a complex network of intracellular signaling cascades, including Rac1, MEK/ MAPK/ERK1 and PI3K/AKT/mTOR and JAK-STAT pathways. It is possible to classify cytokines, based on the nature of the immune response, in pro-inflammatory cytokines (i.e., IL-1, IL-6, IL-17, TNF $\alpha$  and IFN- $\gamma$ ), and anti-inflammatory cytokines (i.e., IL-4, IL-5) [88].

Deregulated expression of several cytokines, their receptors and downstream effectors was observed in SALS patients, primarily in SALS2 (Supplementary Figure 4).

Although the pathogenic role of cytokines in ALS is still unknown, previous studies have associated their abnormal expression to the clinical status [89-91]. In accordance with our results, a variety of proinflammatory cytokines and growth factors, such as TGF- $\beta$ , IL-1, IL-2, IL-4, IL-5 and IL-15, have previously been reported to be elevated in cerebrospinal fluid of human ALS [91]. In addition, activation of EGF signaling as well as reductions in VEGF signaling pathways seem to play a role in the pathogenesis of ALS, by triggering quiescent astrocytes into reactive astrocytes and, consequently, activating the neurodegenerative process [92, 93]. In support of this hypothesis, the pharmacological inhibition of IL-1, IL-6, IL-8R/CXCR2 and EGFR/ErbB2 signaling, as well as the administration of VEGF activators, reduce inflammation, provide neuroprotection and retard the progression of ALS pathology [94-101].

One of the main mechanisms for cytokine and chemokine signal transduction is represented by the JAK-STAT pathway. Differential expression of genes encoding various components of JAK/STAT signaling was found in SALS patients (Supplementary Figure 4), in agreement with previous studies showing that the dysregulation of this pathway occurs in inflammatory and neurodegenerative diseases, such as ALS [102]. Activation of the JAK-STAT pathway is also associated with the increased expression of a series of molecules involved in cytoskeleton remodeling, cell adhesion and migration, including Fibronectin, MMPs, FAK-1, VCAM1/ICAM1 receptors as well as tight junction proteins, whose deregulated expression was found in patients affected by SALS (Supplementary Figure 4) and other neurological diseases, including AD [103, 104]. It is interesting to note that the pharmacological blockade of the JAK-STAT pathway or its downstream effectors (e.g., FAK1 and MMPs) triggers neuroprotective effects, slowing disease progression and increasing survival in ALS animal models [105-108]. Altogether, these findings suggest that deciphering the complex actions of altered cytokine and chemokine networks may help to further elucidate the neuroinflammatory processes occurring in ALS.

## **LIST OF ABBREVIATIONS**

Nardilysin convertase (NRD1); tripeptidyl peptidase 2 (TPP2); aminopeptidase puromycin sensitive (NPEPPS); bleomycin hydrolase (BLMH); thimet oligopeptidase (THOP1); SEC11 homolog C, signal peptidase complex subunit (SPC); proprotein convertase subtilisin/kexin type 7 (PC7); histocompatibility minor 13 (Impas-1); heat shock proteins (HSPs); heat shock protein 70 gene family (HSP70); heat shock protein 90 gene family (HSP90); STIP1 homology and U-box containing protein 1 (CHIP); transporter 1, ATP binding cassette subfamily B member (TAP1); transporter 2, ATP binding cassette subfamily B member (TAP2); tapasin (TPSN); protein disulfide isomerase family A member 3 (PDIA3); calreticulin (CALR); calnexin (CANX); UDP-glucose glycoprotein glucosyltransferase 1 (UGCGT1); B-cell receptor-associated protein 31 (BCAP31); beta-2-microglobulin (B2M), endoplasmic (ENPL), coat protein complex II (COPII); endoplasmic reticulum aminopeptidase 1 (ERAP1); caveolin 1 (CAV1); T cell receptor associated transmembrane adaptor 1 (TRIM1); toll interacting protein (TOLLIP); dipeptidyl peptidase 4 (DPP4); T-cell surface glycoprotein CD4 (CD4); T-cell surface antigen CD99 (MIC2); protein tyrosine phosphatase, receptor type C (CD45); inducible T-cell costimulator (ICOS); inducible T-cell costimulator ligand (ICOS-L); killer cell immunoglobulin like receptors (KIRs); killer cell lectin like receptors (KLRs); killer cell lectin like receptor C1 (NKG2A); killer cell immunoglobulin like receptor, two Ig domains and short cytoplasmic tail 1 (KIR2DS1); killer cell immunoglobulin like receptor, two Ig domains and short cytoplasmic tail 2 (KIR2DS2); killer cell lectin like receptor A1, pseudogene (KLRA1); B-cell antigen receptor complex-associated protein alpha chain (CD79A); low affinity immunoglobulin gamma Fc region receptor II (FcγRIIB), integrin subunit beta 1 (ITGB1); ORAI calcium release-activated calcium modulator 1 (CRACM1); leukocyte C-terminal Src kinase (LCK); Lck/Yes-related novel protein tyrosine kinase (LYN); tyrosine-protein kinase Fyn (FYN); spleen associated tyrosine kinase (SYK); zeta chain of T cell receptor associated protein kinase 70 (ZAP70); protein tyrosine phosphatase, non-receptor type 6 (SHP1); protein tyrosine phosphatase, non-receptor type 11 (SHP2); mitogen-activated protein kinase kinase kinase 4 (MKK4); MAP kinase kinase (MEK); extracellular signal-regulated kinase (ERK); p38 mitogen-activated protein kinase (p38 MAPK); c-Jun N-terminal kinases (JNK); growth factor receptor bound protein 2 (Grb2); SOS Ras/Rho guanine nucleotide exchange factor (SOS); vav guanine nucleotide exchange factors (VAVs); V-Ki-ras2 Kirsten rat sarcoma viral oncogene homolog (K-RAS); Harvey rat sarcoma viral oncogene homolog (H-RAS); T-cell lymphoma invasion and metastasis 1 (Tiam1); cell division cycle 42 (CDC42); ras-related C3 botulinum toxin substrate 1 (Rac1); ras homolog family member A (RhoA); phosphoinositide-3-kinase (PI3K); serine/threonine kinase (AKT); mechanistic target of rapamycin (mTOR); phospholipase C (PLC); inositol 1,4,5-trisphosphate (IP3); 1,2-diacylglycerol (DAG); protein kinase C (PKC); high mobility group box 1 (HMGB1); nuclear factor kappa B subunit 1 (NF-κB); activator protein 1 (AP-1); cAMP responsive element binding protein (CREB1); Jun proto-oncogene, AP-1 transcription factor subunit (c-Jun); decay accelerating factor (DAF/CD55); V-set and immunoglobulin domain containing 4 (CRIg); complement C3d receptor 2 (CD21); mannan binding lectin serine peptidase 1 (MASP-1); transforming growth factor beta (TGF-β); Janus kinase (JAK); signal transducer and activator of transcription (STAT); epidermal growth factor (EGF); epidermal growth factor receptor (EGFR); erb-b2 receptor tyrosine kinase 2 (ErbB2); C-X-C motif chemokine receptor 2 (IL-8R/CXCR2); matrix metalloproteinases (MMPs); focal adhesion kinase 1 (FAK-1); vascular cell adhesion molecule 1 (VCAM1); intercellular adhesion molecule 1 (ICAM1).

## Supplementary References List

1. de Oliveira, G. P.; Alves, C. J.; Chadi, G., Early gene expression changes in spinal cord from SOD1(G93A) Amyotrophic Lateral Sclerosis animal model. *Frontiers in cellular neuroscience* **2013**, 7, 216.
2. Bendotti, C.; Marino, M.; Cheroni, C.; Fontana, E.; Crippa, V.; Poletti, A.; De Biasi, S., Dysfunction of constitutive and inducible ubiquitin-proteasome system in amyotrophic lateral sclerosis: implication for protein aggregation and immune response. *Progress in neurobiology* **2012**, 97 (2), 101-26.
3. Saris, C. G.; Groen, E. J.; Koekkoek, J. A.; Veldink, J. H.; van den Berg, L. H., Meta-analysis of gene expression profiling in amyotrophic lateral sclerosis: a comparison between transgenic mouse models and human patients. *Amyotrophic lateral sclerosis & frontotemporal degeneration* **2013**, 14 (3), 177-89.
4. Cheroni, C.; Marino, M.; Tortarolo, M.; Veglianesi, P.; De Biasi, S.; Fontana, E.; Zuccarello, L. V.; Maynard, C. J.; Dantuma, N. P.; Bendotti, C., Functional alterations of the ubiquitin-proteasome system in motor neurons of a mouse model of familial amyotrophic lateral sclerosis. *Human molecular genetics* **2009**, 18 (1), 82-96.
5. Ren, G.; Ma, Z.; Hui, M.; Kudo, L. C.; Hui, K. S.; Karsten, S. L., Cu, Zn-superoxide dismutase 1 (SOD1) is a novel target of Puromycin-sensitive aminopeptidase (PSA/NPEPPS): PSA/NPEPPS is a possible modifier of amyotrophic lateral sclerosis. *Molecular neurodegeneration* **2011**, 6, 29.
6. Ohno, M.; Hiraoka, Y.; Matsuoka, T.; Tomimoto, H.; Takao, K.; Miyakawa, T.; Oshima, N.; Kiyonari, H.; Kimura, T.; Kita, T.; Nishi, E., Nardilysin regulates axonal maturation and myelination in the central and peripheral nervous system. *Nature neuroscience* **2009**, 12 (12), 1506-13.
7. Moliaka, Y. K.; Grigorenko, A.; Madera, D.; Rogaev, E. I., Impas 1 possesses endoproteolytic activity against multipass membrane protein substrate cleaving the presenilin 1 holoprotein. *FEBS letters* **2004**, 557 (1-3), 185-92.
8. Kalmar, B.; Lu, C. H.; Greensmith, L., The role of heat shock proteins in Amyotrophic Lateral Sclerosis: The therapeutic potential of Arimoclomol. *Pharmacology & therapeutics* **2014**, 141 (1), 40-54.
9. Choi, J. S.; Cho, S.; Park, S. G.; Park, B. C.; Lee, D. H., Co-chaperone CHIP associates with mutant Cu/Zn-superoxide dismutase proteins linked to familial amyotrophic lateral sclerosis and promotes their degradation by proteasomes. *Biochemical and biophysical research communications* **2004**, 321 (3), 574-83.
10. Lampson, L. A.; Kushner, P. D.; Sobel, R. A., Major histocompatibility complex antigen expression in the affected tissues in amyotrophic lateral sclerosis. *Ann Neurol* **1990**, 28 (3), 365-72.
11. Nardo, G.; Trolese, M. C.; Bendotti, C., Major Histocompatibility Complex I Expression by Motor Neurons and Its Implication in Amyotrophic Lateral Sclerosis. *Frontiers in neurology* **2016**, 7, 89.
12. Amor, S.; Puentes, F.; Baker, D.; van der Valk, P., Inflammation in neurodegenerative diseases. *Immunology* **2010**, 129 (2), 154-69.
13. Scorisa, J. M.; Freria, C. M.; Victorio, S. C.; Barbizan, R.; Zanon, R. G.; Oliveira, A. L., Glatiramer acetate treatment increases stability of spinal synapses and down regulates MHC I during the course of EAE. *International journal of biological sciences* **2011**, 7 (8), 1188-202.
14. Rentzos, M.; Evangelopoulos, E.; Sereti, E.; Zouvelou, V.; Marmara, S.; Alexakis, T.; Evdokimidis, I., Alterations of T cell subsets in ALS: a systemic immune activation? *Acta neurologica Scandinavica* **2012**, 125 (4), 260-4.
15. Beers, D. R.; Henkel, J. S.; Zhao, W.; Wang, J.; Huang, A.; Wen, S.; Liao, B.; Appel, S. H., Endogenous regulatory T lymphocytes ameliorate amyotrophic lateral sclerosis in mice and

correlate with disease progression in patients with amyotrophic lateral sclerosis. *Brain : a journal of neurology* **2011**, 134 (Pt 5), 1293-314.

16. Henkel, J. S.; Beers, D. R.; Wen, S.; Rivera, A. L.; Toennis, K. M.; Appel, J. E.; Zhao, W.; Moore, D. H.; Powell, S. Z.; Appel, S. H., Regulatory T-lymphocytes mediate amyotrophic lateral sclerosis progression and survival. *EMBO molecular medicine* **2013**, 5 (1), 64-79.

17. Mantovani, S.; Garbelli, S.; Pasini, A.; Alimonti, D.; Perotti, C.; Melazzini, M.; Bendotti, C.; Mora, G., Immune system alterations in sporadic amyotrophic lateral sclerosis patients suggest an ongoing neuroinflammatory process. *Journal of neuroimmunology* **2009**, 210 (1-2), 73-9.

18. Liu, Y.; Liang, Z.; Liu, J.; Zou, W.; Li, X.; Wang, Y.; An, L., Downregulation of caveolin-1 contributes to the synaptic plasticity deficit in the hippocampus of aged rats. *Neural regeneration research* **2013**, 8 (29), 2725-33.

19. Head, B. P.; Peart, J. N.; Panneerselvam, M.; Yokoyama, T.; Pearn, M. L.; Niesman, I. R.; Bonds, J. A.; Schilling, J. M.; Miyanohara, A.; Headrick, J.; Ali, S. S.; Roth, D. M.; Patel, P. M.; Patel, H. H., Loss of caveolin-1 accelerates neurodegeneration and aging. *PloS one* **2010**, 5 (12), e15697.

20. Sohn, H. W.; Choi, E. Y.; Kim, S. H.; Lee, I. S.; Chung, D. H.; Sung, U. A.; Hwang, D. H.; Cho, S. S.; Jun, B. H.; Jang, J. J.; Chi, J. G.; Park, S. H., Engagement of CD99 induces apoptosis through a calcineurin-independent pathway in Ewing's sarcoma cells. *The American journal of pathology* **1998**, 153 (6), 1937-45.

21. Winger, R. C.; Harp, C. T.; Chiang, M. Y.; Sullivan, D. P.; Watson, R. L.; Weber, E. W.; Podojil, J. R.; Miller, S. D.; Muller, W. A., Cutting Edge: CD99 Is a Novel Therapeutic Target for Control of T Cell-Mediated Central Nervous System Autoimmune Disease. *Journal of immunology* **2016**, 196 (4), 1443-8.

22. Rathke-Hartlieb, S.; Schmidt, V. C.; Jockusch, H.; Schmitt-John, T.; Bartsch, J. W., Spatiotemporal progression of neurodegeneration and glia activation in the wobbler neuropathy of the mouse. *Neuroreport* **1999**, 10 (16), 3411-6.

23. Townsend, K. P.; Vendrame, M.; Ehrhart, J.; Faza, B.; Zeng, J.; Town, T.; Tan, J., CD45 isoform RB as a molecular target to oppose lipopolysaccharide-induced microglial activation in mice. *Neuroscience letters* **2004**, 362 (1), 26-30.

24. Tan, J.; Town, T.; Mullan, M., CD45 inhibits CD40L-induced microglial activation via negative regulation of the Src/p44/42 MAPK pathway. *The Journal of biological chemistry* **2000**, 275 (47), 37224-31.

25. Borrego, F.; Kabat, J.; Kim, D. K.; Lieto, L.; Maasho, K.; Pena, J.; Solana, R.; Coligan, J. E., Structure and function of major histocompatibility complex (MHC) class I specific receptors expressed on human natural killer (NK) cells. *Molecular immunology* **2002**, 38 (9), 637-60.

26. Maghazachi, A. A., Role of chemokines in the biology of natural killer cells. *Current topics in microbiology and immunology* **2010**, 341, 37-58.

27. Malhotra, A.; Shanker, A., NK cells: immune cross-talk and therapeutic implications. *Immunotherapy* **2011**, 3 (10), 1143-66.

28. Philips, T.; Rothstein, J. D., Glial cells in amyotrophic lateral sclerosis. *Experimental neurology* **2014**, 262 Pt B, 111-20.

29. Pool, M.; Rambaldi, I.; Darlington, P. J.; Wright, M. C.; Fournier, A. E.; Bar-Or, A., Neurite outgrowth is differentially impacted by distinct immune cell subsets. *Molecular and cellular neurosciences* **2012**, 49 (1), 68-76.

30. Jadidi-Niaragh, F.; Shegarfi, H.; Naddafi, F.; Mirshafiey, A., The role of natural killer cells in Alzheimer's disease. *Scandinavian journal of immunology* **2012**, 76 (5), 451-6.

31. Poli, A.; Kmiecik, J.; Domingues, O.; Hentges, F.; Blery, M.; Chekenya, M.; Boucraut, J.; Zimmer, J., NK cells in central nervous system disorders. *Journal of immunology* **2013**, 190 (11), 5355-62.

32. Pieper, K.; Grimbacher, B.; Eibel, H., B-cell biology and development. *The Journal of allergy and clinical immunology* **2013**, 131 (4), 959-71.

33. McCombe, P. A.; Henderson, R. D., The Role of immune and inflammatory mechanisms in ALS. *Current molecular medicine* **2011**, *11* (3), 246-54.
34. Naor, S.; Keren, Z.; Bronshtein, T.; Goren, E.; Machluf, M.; Melamed, D., Development of ALS-like disease in SOD-1 mice deficient of B lymphocytes. *Journal of neurology* **2009**, *256* (8), 1228-35.
35. Kedmi, M.; Bar-Shira, A.; Gurevich, T.; Giladi, N.; Orr-Urtreger, A., Decreased expression of B cell related genes in leukocytes of women with Parkinson's disease. *Molecular neurodegeneration* **2011**, *6*, 66.
36. Comabella, M.; Montalban, X.; Kakalacheva, K.; Osman, D.; Nimmerjahn, F.; Tintore, M.; Lunemann, J. D., B cell expression of the inhibitory Fc gamma receptor is unchanged in early MS. *Journal of neuroimmunology* **2010**, *223* (1-2), 135-7.
37. Li, X.; Kimberly, R. P., Targeting the Fc receptor in autoimmune disease. *Expert opinion on therapeutic targets* **2014**, *18* (3), 335-50.
38. Nakamura, K.; Hirai, H.; Torashima, T.; Miyazaki, T.; Tsurui, H.; Xiu, Y.; Ohtsuji, M.; Lin, Q. S.; Tsukamoto, K.; Nishimura, H.; Ono, M.; Watanabe, M.; Hirose, S., CD3 and immunoglobulin G Fc receptor regulate cerebellar functions. *Molecular and cellular biology* **2007**, *27* (14), 5128-34.
39. Moccia, F.; Zuccolo, E.; Soda, T.; Tanzi, F.; Guerra, G.; Mapelli, L.; Lodola, F.; D'Angelo, E., Stim and Orai proteins in neuronal Ca(2+) signaling and excitability. *Frontiers in cellular neuroscience* **2015**, *9*, 153.
40. Vigont, V.; Kolobkova, Y.; Skopin, A.; Zimina, O.; Zenin, V.; Glushankova, L.; Kaznacheyeva, E., Both Orai1 and TRPC1 are Involved in Excessive Store-Operated Calcium Entry in Striatal Neurons Expressing Mutant Huntingtin Exon 1. *Frontiers in physiology* **2015**, *6*, 337.
41. Lewis, C. A.; Manning, J.; Rossi, F.; Krieger, C., The Neuroinflammatory Response in ALS: The Roles of Microglia and T Cells. *Neurology research international* **2012**, *2012*, 803701.
42. Lowell, C. A., Src-family and Syk kinases in activating and inhibitory pathways in innate immune cells: signaling cross talk. *Cold Spring Harbor perspectives in biology* **2011**, *3* (3).
43. Nygaard, H. B.; van Dyck, C. H.; Strittmatter, S. M., Fyn kinase inhibition as a novel therapy for Alzheimer's disease. *Alzheimer's research & therapy* **2014**, *6* (1), 8.
44. Hata, R.; Masumura, M.; Akatsu, H.; Li, F.; Fujita, H.; Nagai, Y.; Yamamoto, T.; Okada, H.; Kosaka, K.; Sakanaka, M.; Sawada, T., Up-regulation of calcineurin Abeta mRNA in the Alzheimer's disease brain: assessment by cDNA microarray. *Biochemical and biophysical research communications* **2001**, *284* (2), 310-6.
45. Ho Kim, J.; Franck, J.; Kang, T.; Heinsen, H.; Ravid, R.; Ferrer, I.; Hee Cheon, M.; Lee, J. Y.; Shin Yoo, J.; Steinbusch, H. W.; Salzert, M.; Fournier, I.; Mok Park, Y., Proteome-wide characterization of signalling interactions in the hippocampal CA4/DG subfield of patients with Alzheimer's disease. *Scientific reports* **2015**, *5*, 11138.
46. Krisenko, M. O.; Higgins, R. L.; Ghosh, S.; Zhou, Q.; Trybula, J. S.; Wang, W. H.; Geahlen, R. L., Syk Is Recruited to Stress Granules and Promotes Their Clearance through Autophagy. *The Journal of biological chemistry* **2015**, *290* (46), 27803-15.
47. Park, H.; Ahn, K. J.; Lee Kang, J.; Choi, Y. H., Protein-protein interaction between caveolin-1 and SHP-2 is dependent on the N-SH2 domain of SHP-2. *BMB reports* **2015**, *48* (3), 184-9.
48. Takai, S.; Yamada, M.; Araki, T.; Koshimizu, H.; Nawa, H.; Hatanaka, H., Shp-2 positively regulates brain-derived neurotrophic factor-promoted survival of cultured ventral mesencephalic dopaminergic neurons through a brain immunoglobulin-like molecule with tyrosine-based activation motifs/Shp substrate-1. *Journal of neurochemistry* **2002**, *82* (2), 353-64.
49. Chong, Z. Z.; Maiese, K., The Src homology 2 domain tyrosine phosphatases SHP-1 and SHP-2: diversified control of cell growth, inflammation, and injury. *Histology and histopathology* **2007**, *22* (11), 1251-67.

50. Kim, E. K.; Choi, E. J., Pathological roles of MAPK signaling pathways in human diseases. *Biochimica et biophysica acta* **2010**, 1802 (4), 396-405.
51. Kim, E. K.; Choi, E. J., Compromised MAPK signaling in human diseases: an update. *Archives of toxicology* **2015**, 89 (6), 867-82.
52. Gurney, M. E.; Pu, H.; Chiu, A. Y.; Dal Canto, M. C.; Polchow, C. Y.; Alexander, D. D.; Caliendo, J.; Hentati, A.; Kwon, Y. W.; Deng, H. X.; et al., Motor neuron degeneration in mice that express a human Cu,Zn superoxide dismutase mutation. *Science* **1994**, 264 (5166), 1772-5.
53. Holasek, S. S.; Wengenack, T. M.; Kandimalla, K. K.; Montano, C.; Gregor, D. M.; Curran, G. L.; Poduslo, J. F., Activation of the stress-activated MAP kinase, p38, but not JNK in cortical motor neurons during early presymptomatic stages of amyotrophic lateral sclerosis in transgenic mice. *Brain research* **2005**, 1045 (1-2), 185-98.
54. Bendotti, C.; Atzori, C.; Piva, R.; Tortarolo, M.; Strong, M. J.; DeBiasi, S.; Migheli, A., Activated p38MAPK is a novel component of the intracellular inclusions found in human amyotrophic lateral sclerosis and mutant SOD1 transgenic mice. *Journal of neuropathology and experimental neurology* **2004**, 63 (2), 113-9.
55. Dewil, M.; dela Cruz, V. F.; Van Den Bosch, L.; Robberecht, W., Inhibition of p38 mitogen activated protein kinase activation and mutant SOD1(G93A)-induced motor neuron death. *Neurobiology of disease* **2007**, 26 (2), 332-41.
56. Kirby, J.; Ning, K.; Ferraiuolo, L.; Heath, P. R.; Ismail, A.; Kuo, S. W.; Valori, C. F.; Cox, L.; Sharrack, B.; Wharton, S. B.; Ince, P. G.; Shaw, P. J.; Azzouz, M., Phosphatase and tensin homologue/protein kinase B pathway linked to motor neuron survival in human superoxide dismutase 1-related amyotrophic lateral sclerosis. *Brain : a journal of neurology* **2011**, 134 (Pt 2), 506-17.
57. Linseman, D. A.; Loucks, F. A., Diverse roles of Rho family GTPases in neuronal development, survival, and death. *Frontiers in bioscience : a journal and virtual library* **2008**, 13, 657-76.
58. Kanekura, K.; Hashimoto, Y.; Kita, Y.; Sasabe, J.; Aiso, S.; Nishimoto, I.; Matsuoka, M., A Rac1/phosphatidylinositol 3-kinase/Akt3 anti-apoptotic pathway, triggered by AlsinLF, the product of the ALS2 gene, antagonizes Cu/Zn-superoxide dismutase (SOD1) mutant-induced motoneuronal cell death. *The Journal of biological chemistry* **2005**, 280 (6), 4532-43.
59. de Oliveira, G. P.; Maximino, J. R.; Maschietto, M.; Zanoteli, E.; Puga, R. D.; Lima, L.; Carraro, D. M.; Chadi, G., Early gene expression changes in skeletal muscle from SOD1(G93A) amyotrophic lateral sclerosis animal model. *Cellular and molecular neurobiology* **2014**, 34 (3), 451-62.
60. Brunet, A.; Datta, S. R.; Greenberg, M. E., Transcription-dependent and -independent control of neuronal survival by the PI3K-Akt signaling pathway. *Current opinion in neurobiology* **2001**, 11 (3), 297-305.
61. Yin, X.; Ren, M.; Jiang, H.; Cui, S.; Wang, S.; Jiang, H.; Qi, Y.; Wang, J.; Wang, X.; Dong, G.; Leeds, P.; Chuang, D. M.; Feng, H., Downregulated AEG-1 together with inhibited PI3K/Akt pathway is associated with reduced viability of motor neurons in an ALS model. *Molecular and cellular neurosciences* **2015**, 68, 303-13.
62. Nicolini, C.; Ahn, Y.; Michalski, B.; Rho, J. M.; Fahnstock, M., Decreased mTOR signaling pathway in human idiopathic autism and in rats exposed to valproic acid. *Acta neuropathologica communications* **2015**, 3, 3.
63. Grosskreutz, J.; Van Den Bosch, L.; Keller, B. U., Calcium dysregulation in amyotrophic lateral sclerosis. *Cell calcium* **2010**, 47 (2), 165-74.
64. Kopeck, A.; Panaszek, B.; Fal, A. M., Intracellular signaling pathways in IgE-dependent mast cell activation. *Archivum immunologiae et therapiae experimentalis* **2006**, 54 (6), 393-401.
65. Hu, J. H.; Zhang, H.; Wagey, R.; Krieger, C.; Pelech, S. L., Protein kinase and protein phosphatase expression in amyotrophic lateral sclerosis spinal cord. *Journal of neurochemistry* **2003**, 85 (2), 432-442.

66. Tadic, V.; Prell, T.; Lautenschlaeger, J.; Grosskreutz, J., The ER mitochondria calcium cycle and ER stress response as therapeutic targets in amyotrophic lateral sclerosis. *Frontiers in cellular neuroscience* **2014**, *8*, 147.
67. Staats, K. A.; Van Helleputte, L.; Jones, A. R.; Bento-Abreu, A.; Van Hoecke, A.; Shatunov, A.; Simpson, C. L.; Lemmens, R.; Jaspers, T.; Fukami, K.; Nakamura, Y.; Brown, R. H., Jr.; Van Damme, P.; Liston, A.; Robberecht, W.; Al-Chalabi, A.; Van Den Bosch, L., Genetic ablation of phospholipase C delta 1 increases survival in SOD1(G93A) mice. *Neurobiology of disease* **2013**, *60*, 11-7.
68. Casula, M.; Iyer, A. M.; Spliet, W. G.; Anink, J. J.; Steentjes, K.; Sta, M.; Troost, D.; Aronica, E., Toll-like receptor signaling in amyotrophic lateral sclerosis spinal cord tissue. *Neuroscience* **2011**, *179*, 233-43.
69. Ray, R.; Juranek, J. K.; Rai, V., RAGE axis in neuroinflammation, neurodegeneration and its emerging role in the pathogenesis of amyotrophic lateral sclerosis. *Neuroscience and biobehavioral reviews* **2016**, *62*, 48-55.
70. Letiembre, M.; Liu, Y.; Walter, S.; Hao, W.; Pfander, T.; Wrede, A.; Schulz-Schaeffer, W.; Fassbender, K., Screening of innate immune receptors in neurodegenerative diseases: a similar pattern. *Neurobiol Aging* **2009**, *30* (5), 759-68.
71. Liu, Y.; Hao, W.; Dawson, A.; Liu, S.; Fassbender, K., Expression of amyotrophic lateral sclerosis-linked SOD1 mutant increases the neurotoxic potential of microglia via TLR2. *The Journal of biological chemistry* **2009**, *284* (6), 3691-9.
72. Lo Coco, D.; Veglianesi, P.; Allievi, E.; Bendotti, C., Distribution and cellular localization of high mobility group box protein 1 (HMGB1) in the spinal cord of a transgenic mouse model of ALS. *Neuroscience letters* **2007**, *412* (1), 73-7.
73. De Paola, M.; Mariani, A.; Bigini, P.; Peviani, M.; Ferrara, G.; Molteni, M.; Gemma, S.; Veglianesi, P.; Castellaneta, V.; Boldrin, V.; Rossetti, C.; Chiabrando, C.; Forloni, G.; Mennini, T.; Fanelli, R., Neuroprotective effects of toll-like receptor 4 antagonism in spinal cord cultures and in a mouse model of motor neuron degeneration. *Molecular medicine* **2012**, *18*, 971-81.
74. Zhao, W.; Beers, D. R.; Henkel, J. S.; Zhang, W.; Urushitani, M.; Julien, J. P.; Appel, S. H., Extracellular mutant SOD1 induces microglial-mediated motoneuron injury. *Glia* **2010**, *58* (2), 231-43.
75. Zhao, W.; Beers, D. R.; Appel, S. H., Immune-mediated mechanisms in the pathoprosession of amyotrophic lateral sclerosis. *Journal of neuroimmune pharmacology : the official journal of the Society on NeuroImmune Pharmacology* **2013**, *8* (4), 888-99.
76. Camandola, S.; Mattson, M. P., NF-kappa B as a therapeutic target in neurodegenerative diseases. *Expert opinion on therapeutic targets* **2007**, *11* (2), 123-32.
77. Feng, X. H.; Yuan, W.; Peng, Y.; Liu, M. S.; Cui, L. Y., Therapeutic effects of dl-3-n-butylphthalide in a transgenic mouse model of amyotrophic lateral sclerosis. *Chinese medical journal* **2012**, *125* (10), 1760-6.
78. Morley, B. J.; Walport, M. J., 2 - The Complement System. In *The Complement FactsBook*, Academic Press: London, 2000; pp 7-22.
79. Guo, R. F.; Ward, P. A., Role of C5a in inflammatory responses. *Annual review of immunology* **2005**, *23*, 821-52.
80. Bonifati, D. M.; Kishore, U., Role of complement in neurodegeneration and neuroinflammation. *Molecular immunology* **2007**, *44* (5), 999-1010.
81. Morgan, B. P., The role of complement in neurological and neuropsychiatric diseases. *Expert review of clinical immunology* **2015**, *11* (10), 1109-19.
82. Lee, J. D.; Kamaruzaman, N. A.; Fung, J. N.; Taylor, S. M.; Turner, B. J.; Atkin, J. D.; Woodruff, T. M.; Noakes, P. G., Dysregulation of the complement cascade in the hSOD1G93A transgenic mouse model of amyotrophic lateral sclerosis. *Journal of neuroinflammation* **2013**, *10*, 119.

83. Orsini, F.; De Blasio, D.; Zangari, R.; Zanier, E. R.; De Simoni, M. G., Versatility of the complement system in neuroinflammation, neurodegeneration and brain homeostasis. *Frontiers in cellular neuroscience* **2014**, *8*, 380.
84. Bahia El Idrissi, N.; Bosch, S.; Ramaglia, V.; Aronica, E.; Baas, F.; Troost, D., Complement activation at the motor end-plates in amyotrophic lateral sclerosis. *Journal of neuroinflammation* **2016**, *13* (1), 72.
85. Fervenza, F. C.; Sethi, S., Circulating complement levels and C3 glomerulopathy. *Clinical journal of the American Society of Nephrology : CJASN* **2014**, *9* (11), 1829-31.
86. Kolev, M. V.; Ruseva, M. M.; Harris, C. L.; Morgan, B. P.; Donev, R. M., Implication of complement system and its regulators in Alzheimer's disease. *Current neuropharmacology* **2009**, *7* (1), 1-8.
87. Melis, J. P.; Strumane, K.; Ruuls, S. R.; Beurskens, F. J.; Schuurman, J.; Parren, P. W., Complement in therapy and disease: Regulating the complement system with antibody-based therapeutics. *Molecular immunology* **2015**, *67* (2 Pt A), 117-30.
88. Turner, M. D.; Nedjai, B.; Hurst, T.; Pennington, D. J., Cytokines and chemokines: At the crossroads of cell signalling and inflammatory disease. *Biochimica et biophysica acta* **2014**, *1843* (11), 2563-2582.
89. Rentzos, M.; Rombos, A.; Nikolaou, C.; Zoga, M.; Zouvelou, V.; Dimitrakopoulos, A.; Alexakis, T.; Tsoutsou, A.; Samakovli, A.; Michalopoulou, M.; Evdokimidis, J., Interleukin-17 and interleukin-23 are elevated in serum and cerebrospinal fluid of patients with ALS: a reflection of Th17 cells activation? *Acta neurologica Scandinavica* **2010**, *122* (6), 425-9.
90. Malaspina, A.; Puentes, F.; Amor, S., Disease origin and progression in amyotrophic lateral sclerosis: an immunology perspective. *International immunology* **2015**, *27* (3), 117-29.
91. Tateishi, T.; Yamasaki, R.; Tanaka, M.; Matsushita, T.; Kikuchi, H.; Isobe, N.; Ohyagi, Y.; Kira, J., CSF chemokine alterations related to the clinical course of amyotrophic lateral sclerosis. *Journal of neuroimmunology* **2010**, *222* (1-2), 76-81.
92. Liu, B.; Chen, H.; Johns, T. G.; Neufeld, A. H., Epidermal growth factor receptor activation: an upstream signal for transition of quiescent astrocytes into reactive astrocytes after neural injury. *J Neurosci* **2006**, *26* (28), 7532-40.
93. Brockington, A.; Wharton, S. B.; Fernando, M.; Gelsthorpe, C. H.; Baxter, L.; Ince, P. G.; Lewis, C. E.; Shaw, P. J., Expression of vascular endothelial growth factor and its receptors in the central nervous system in amyotrophic lateral sclerosis. *J Neuropathol Exp Neurol* **2006**, *65* (1), 26-36.
94. Maier, A.; Deigendesch, N.; Muller, K.; Weishaupt, J. H.; Krannich, A.; Rohle, R.; Meissner, F.; Molawi, K.; Munch, C.; Holm, T.; Meyer, R.; Meyer, T.; Zychlinsky, A., Interleukin-1 Antagonist Anakinra in Amyotrophic Lateral Sclerosis--A Pilot Study. *PloS one* **2015**, *10* (10), e0139684.
95. Mizwicki, M. T.; Fiala, M.; Magpantay, L.; Aziz, N.; Sayre, J.; Liu, G.; Siani, A.; Chan, D.; Martinez-Maza, O.; Chattopadhyay, M.; La Cava, A., Tocilizumab attenuates inflammation in ALS patients through inhibition of IL6 receptor signaling. *American journal of neurodegenerative disease* **2012**, *1* (3), 305-15.
96. Boston-Howes, W.; Williams, E. O.; Bogush, A.; Scolere, M.; Pasinelli, P.; Trotti, D., Nordihydroguaiaretic acid increases glutamate uptake in vitro and in vivo: therapeutic implications for amyotrophic lateral sclerosis. *Exp Neurol* **2008**, *213* (1), 229-37.
97. Trieu, V. N.; Uckun, F. M., Genistein is neuroprotective in murine models of familial amyotrophic lateral sclerosis and stroke. *Biochem Biophys Res Commun* **1999**, *258* (3), 685-8.
98. Tovar-y-Romo, L. B.; Tapia, R., Delayed administration of VEGF rescues spinal motor neurons from death with a short effective time frame in excitotoxic experimental models in vivo. *ASN Neuro* **2012**, *4* (2).
99. Zheng, C.; Nennesmo, I.; Fadeel, B.; Henter, J. I., Vascular endothelial growth factor prolongs survival in a transgenic mouse model of ALS. *Ann Neurol* **2004**, *56* (4), 564-7.

100. Nefussy, B.; Drory, V. E., Moving toward a predictive and personalized clinical approach in amyotrophic lateral sclerosis: novel developments and future directions in diagnosis, genetics, pathogenesis and therapies. *The EPMA journal* **2010**, *1* (2), 329-41.
101. Gordon, P. H.; Cheung, Y. K.; Levin, B.; Andrews, H.; Doorish, C.; Macarthur, R. B.; Montes, J.; Bednarz, K.; Florence, J.; Rowin, J.; Boylan, K.; Mozaffar, T.; Tandan, R.; Mitsumoto, H.; Kelvin, E. A.; Chapin, J.; Bedlack, R.; Rivner, M.; McCluskey, L. F.; Pestronk, A.; Graves, M.; Sorenson, E. J.; Barohn, R. J.; Belsh, J. M.; Lou, J. S.; Levine, T.; Saperstein, D.; Miller, R. G.; Scelsa, S. N.; Combination Drug Selection Trial Study, G., A novel, efficient, randomized selection trial comparing combinations of drug therapy for ALS. *Amyotroph Lateral Scler* **2008**, *9* (4), 212-22.
102. Nicolas, C. S.; Amici, M.; Bortolotto, Z. A.; Doherty, A.; Csaba, Z.; Fafouri, A.; Dournaud, P.; Gressens, P.; Collingridge, G. L.; Peineau, S., The role of JAK-STAT signaling within the CNS. *Jak-Stat* **2013**, *2* (1), e22925.
103. Grace, E. A.; Busciglio, J., Aberrant activation of focal adhesion proteins mediates fibrillar amyloid beta-induced neuronal dystrophy. *J Neurosci* **2003**, *23* (2), 493-502.
104. Niebroj-Dobosz, I.; Janik, P.; Sokolowska, B.; Kwiecinski, H., Matrix metalloproteinases and their tissue inhibitors in serum and cerebrospinal fluid of patients with amyotrophic lateral sclerosis. *European journal of neurology* **2010**, *17* (2), 226-31.
105. Trieu, V. N.; Liu, R.; Liu, X. P.; Uckun, F. M., A specific inhibitor of janus kinase-3 increases survival in a transgenic mouse model of amyotrophic lateral sclerosis. *Biochem Biophys Res Commun* **2000**, *267* (1), 22-5.
106. Qin, H.; Buckley, J. A.; Li, X.; Liu, Y.; Fox, T. H., 3rd; Meares, G. P.; Yu, H.; Yan, Z.; Harms, A. S.; Li, Y.; Standaert, D. G.; Benveniste, E. N., Inhibition of the JAK/STAT Pathway Protects Against alpha-Synuclein-Induced Neuroinflammation and Dopaminergic Neurodegeneration. *The Journal of neuroscience : the official journal of the Society for Neuroscience* **2016**, *36* (18), 5144-59.
107. Kiaei, M.; Petri, S.; Kipiani, K.; Gardian, G.; Choi, D. K.; Chen, J.; Calingasan, N. Y.; Schafer, P.; Muller, G. W.; Stewart, C.; Hensley, K.; Beal, M. F., Thalidomide and lenalidomide extend survival in a transgenic mouse model of amyotrophic lateral sclerosis. *J Neurosci* **2006**, *26* (9), 2467-73.
108. Kiaei, M.; Kipiani, K.; Petri, S.; Choi, D. K.; Chen, J.; Calingasan, N. Y.; Beal, M. F., Integrative role of cPLA with COX-2 and the effect of non-steriodal anti-inflammatory drugs in a transgenic mouse model of amyotrophic lateral sclerosis. *Journal of neurochemistry* **2005**, *93* (2), 403-11.

## Supplementary Figure and Table Legends

### **Supplementary Figure 1. Alterations in the antigen processing and presentation pathway associated with SALS patients.**

This figure illustrates genes differentially expressed in SALS patients that are involved in the antigen processing and presentation process. Each encoded protein is labeled with two thermometers (1) or (2) that indicate expression levels in SALS cluster 1 and 2, respectively. Up-ward thermometers have red color and indicate up-regulated signals in SALS patients, down-ward (blue) ones indicate down-regulated signals. Colored hexagons on the vectors between objects describe the type of interaction where B = binding, C = cleavage, CM = covalent modification, Cn = competition, CS = complex subunit, GR = group relation, IE = influence on expression, P = phosphorylation, T = transformation, TR = transcriptional regulation, Tn = transport and CR indicates that an object belongs to a group of related proteins. Lines indicate activation (green), inhibition (red) or unspecified (grey) interactions between the molecules. The object shapes correspond to molecule type and are described in the Supplementary Figure 5.

### **Supplementary Figure 2. Alterations in immune and inflammatory signaling observed in SALS patients.**

Genes involved in immune and inflammatory signaling that were differentially expressed in SALS patients versus controls were mapped on pathway. Thermometers labeled with (1) or (2) indicate expression levels in SALS cluster 1 and 2, respectively. Up-ward thermometers have red color and indicate up-regulated signals in SALS patients, down-ward (blue) ones indicate down-regulated signals. Colored hexagons on the vectors between objects describe the type of interaction where B = binding, C = cleavage, CM = covalent modification, Cn = competition, CS = complex subunit, GR = group relation, IE = influence on expression, P = phosphorylation, T = transformation, TR = transcriptional regulation, Tn = transport and CR indicates that an object belongs to a group of related proteins. Lines indicate activation (green), inhibition (red) or unspecified (grey) interactions between the molecules. The object shapes correspond to molecule type and are described in the Supplementary Figure 5.

### **Supplementary Figure 3. Alterations in complement system signaling pathways (classical, lectin and alternative) observed in SALS patients.**

Thermometers labeled with (1) or (2) indicate expression levels in SALS cluster 1 and 2, respectively. Up-ward thermometers have red color and indicate up-regulated signals in SALS patients, down-ward (blue) ones indicate down-regulated signals. Colored hexagons on the vectors between objects describe the type of interaction where B = binding, C = cleavage, CM = covalent modification, Cn = competition, CS = complex subunit, GR = group relation, IE = influence on

expression, P = phosphorylation, T = transformation, TR = transcriptional regulation, Tn = transport and CR indicates that an object belongs to a group of related proteins. Lines indicate activation (green), inhibition (red) or unspecified (grey) interactions between the molecules. The object shapes correspond to molecule type and are described in the Supplementary Figure 5.

**Supplementary Figure 4. Alterations in cytokine signaling observed in SALS patients.**

Thermometers labeled with (1) or (2) indicate expression levels in SALS cluster 1 and 2, respectively. Up-ward thermometers have red color and indicate up-regulated signals in SALS patients, down-ward (blue) ones indicate down-regulated signals. Colored hexagons on the vectors between objects describe the type of interaction where B = binding, C = cleavage, CM = covalent modification, Cn = competition, CS = complex subunit, GR = group relation, IE = influence on expression, P = phosphorylation, T = transformation, TR = transcriptional regulation, Tn = transport and CR indicates that an object belongs to a group of related proteins. Lines indicate activation (green), inhibition (red) or unspecified (grey) interactions between the molecules. The object shapes correspond to molecule type and are described in the Supplementary Figure 5.

**Supplementary Figure 5. Legend describing symbols used in MetaCore pathway.**

**Supplementary Table 1.** Pathway enrichment analysis on the entire list of statistically deregulated genes in SALS patients versus controls.

**Supplementary Table 2.** Pathway enrichment analysis on the entire list of statistically deregulated genes in SALS1 and SALS2 patients compared to controls.

**Supplementary Table 3.** Neuroinflammatory genes differentially expressed in SALS1.

**Supplementary Table 4.** Neuroinflammatory genes differentially expressed in SALS2.

**Supplementary Table 5.** Neuroinflammatory genes differentially expressed in SALS1 and SALS2.

**Supplementary Table 6.** List of genes included in the SALS1-related PPI network.

**Supplementary Table 7.** List of genes included in the SALS2-related PPI network.

**Supplementary Table 8.** Pathway enrichment analyses on the list of statistically deregulated neuroinflammatory genes in SALS patients.

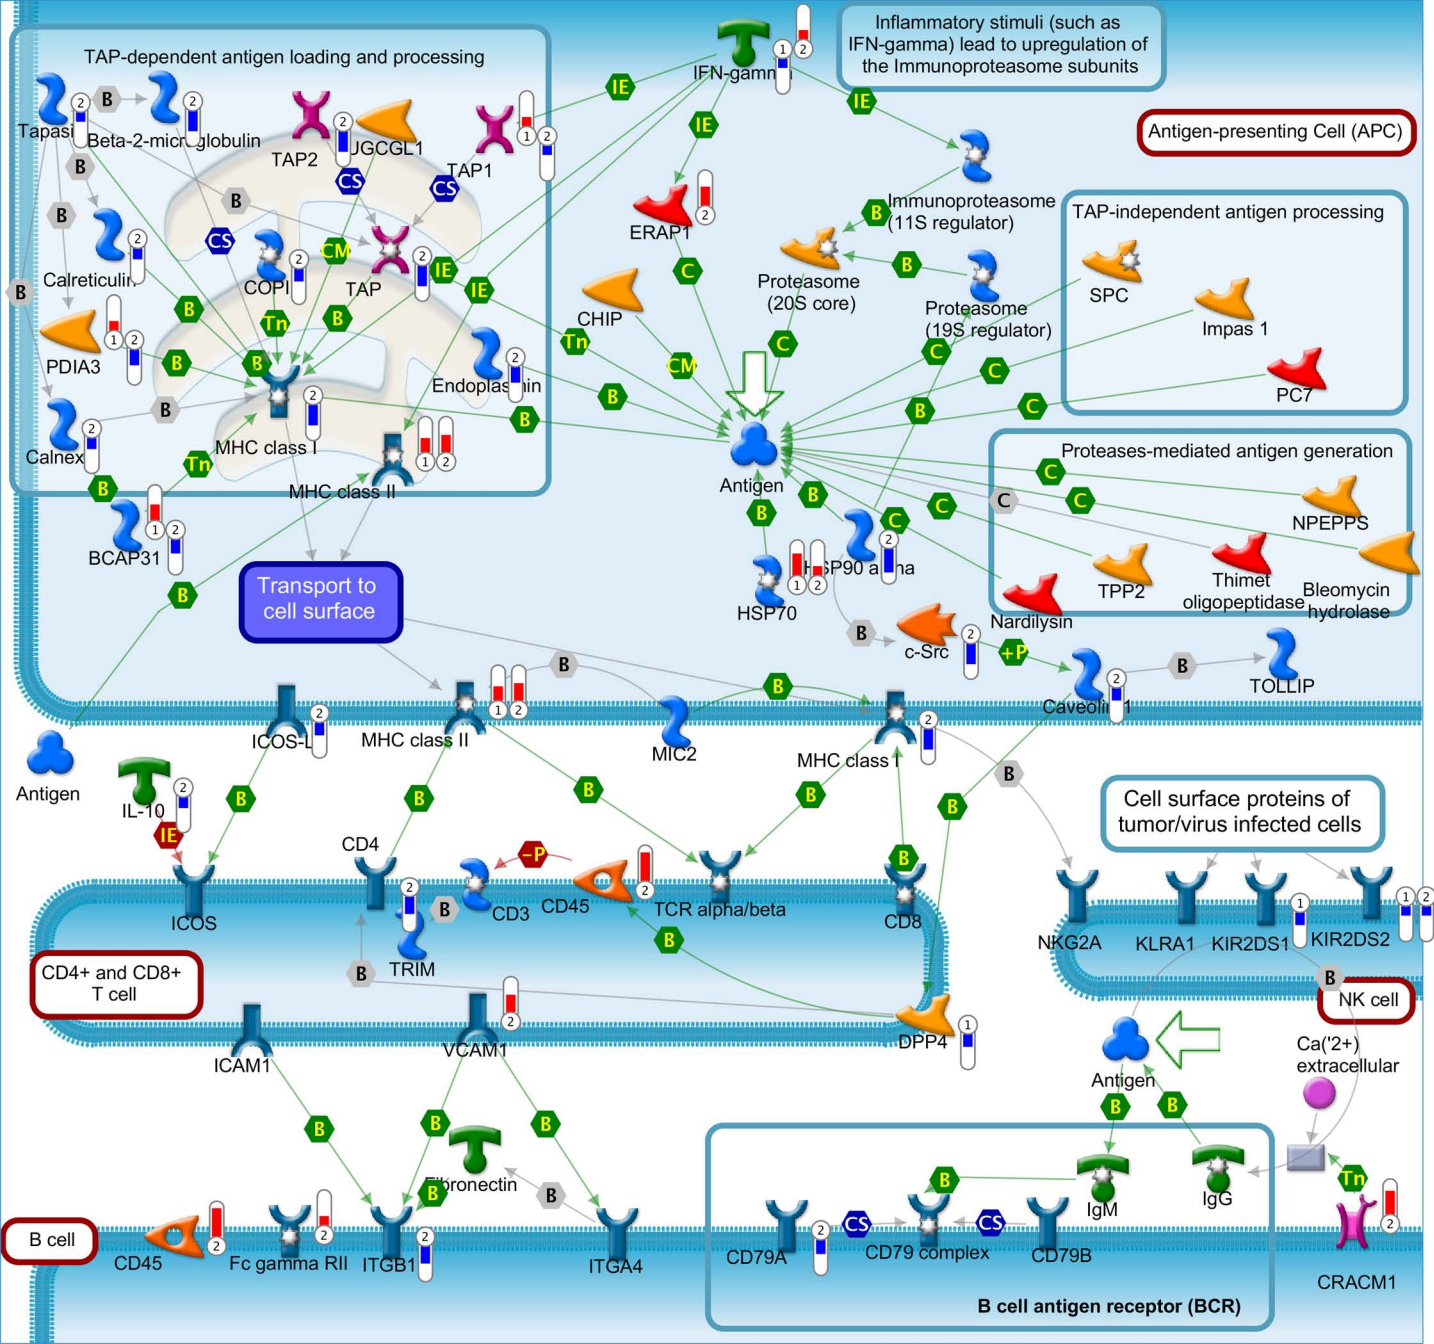

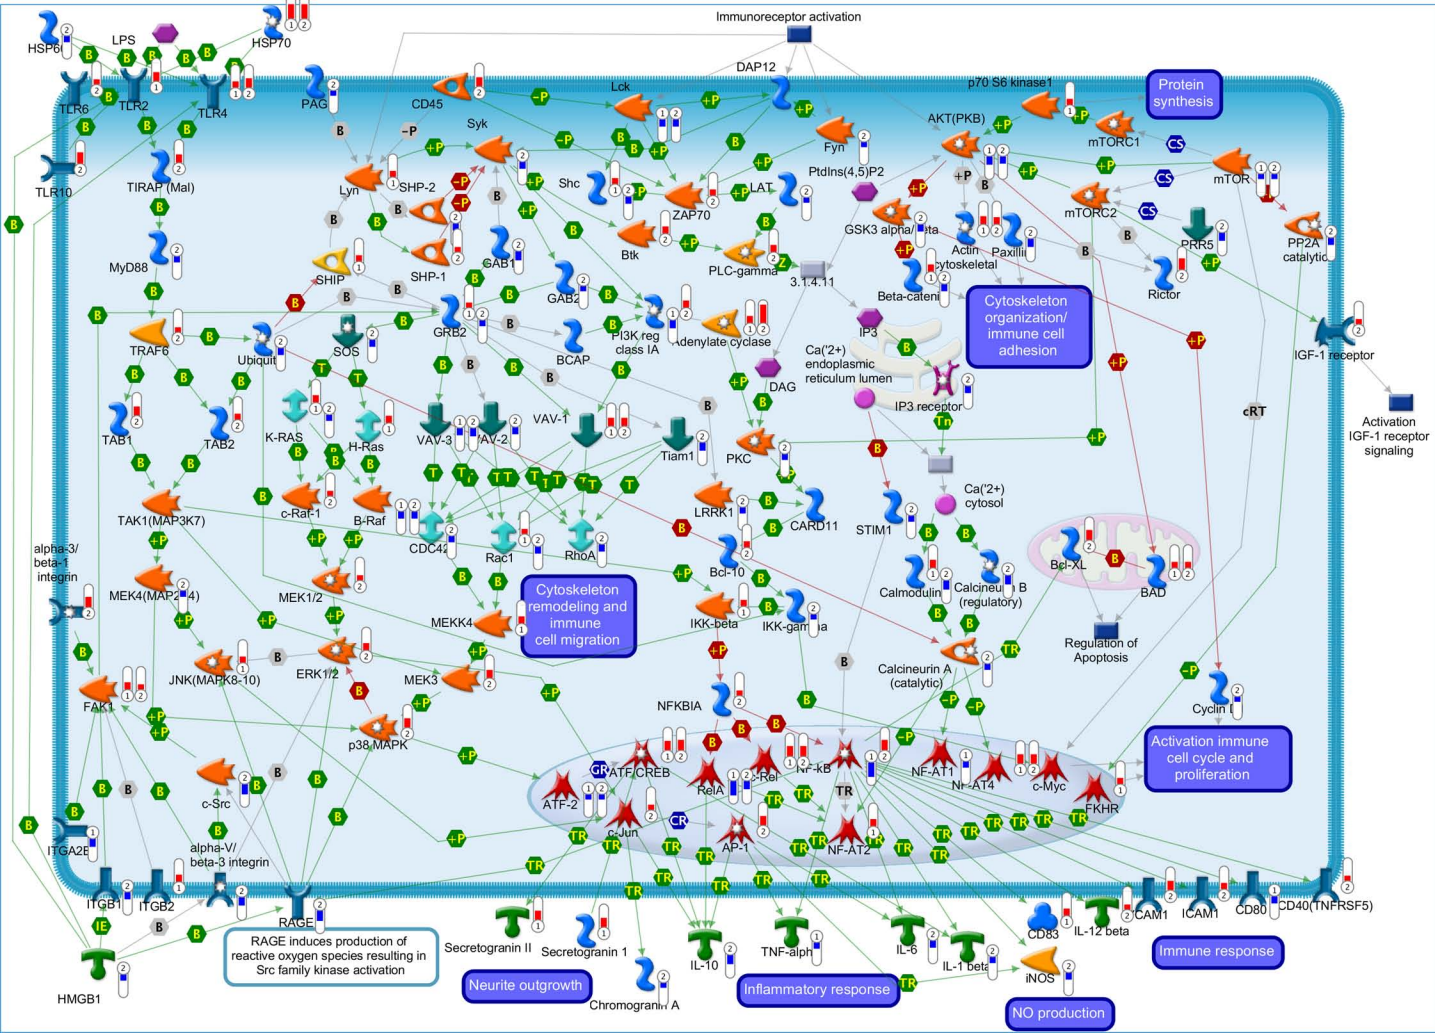

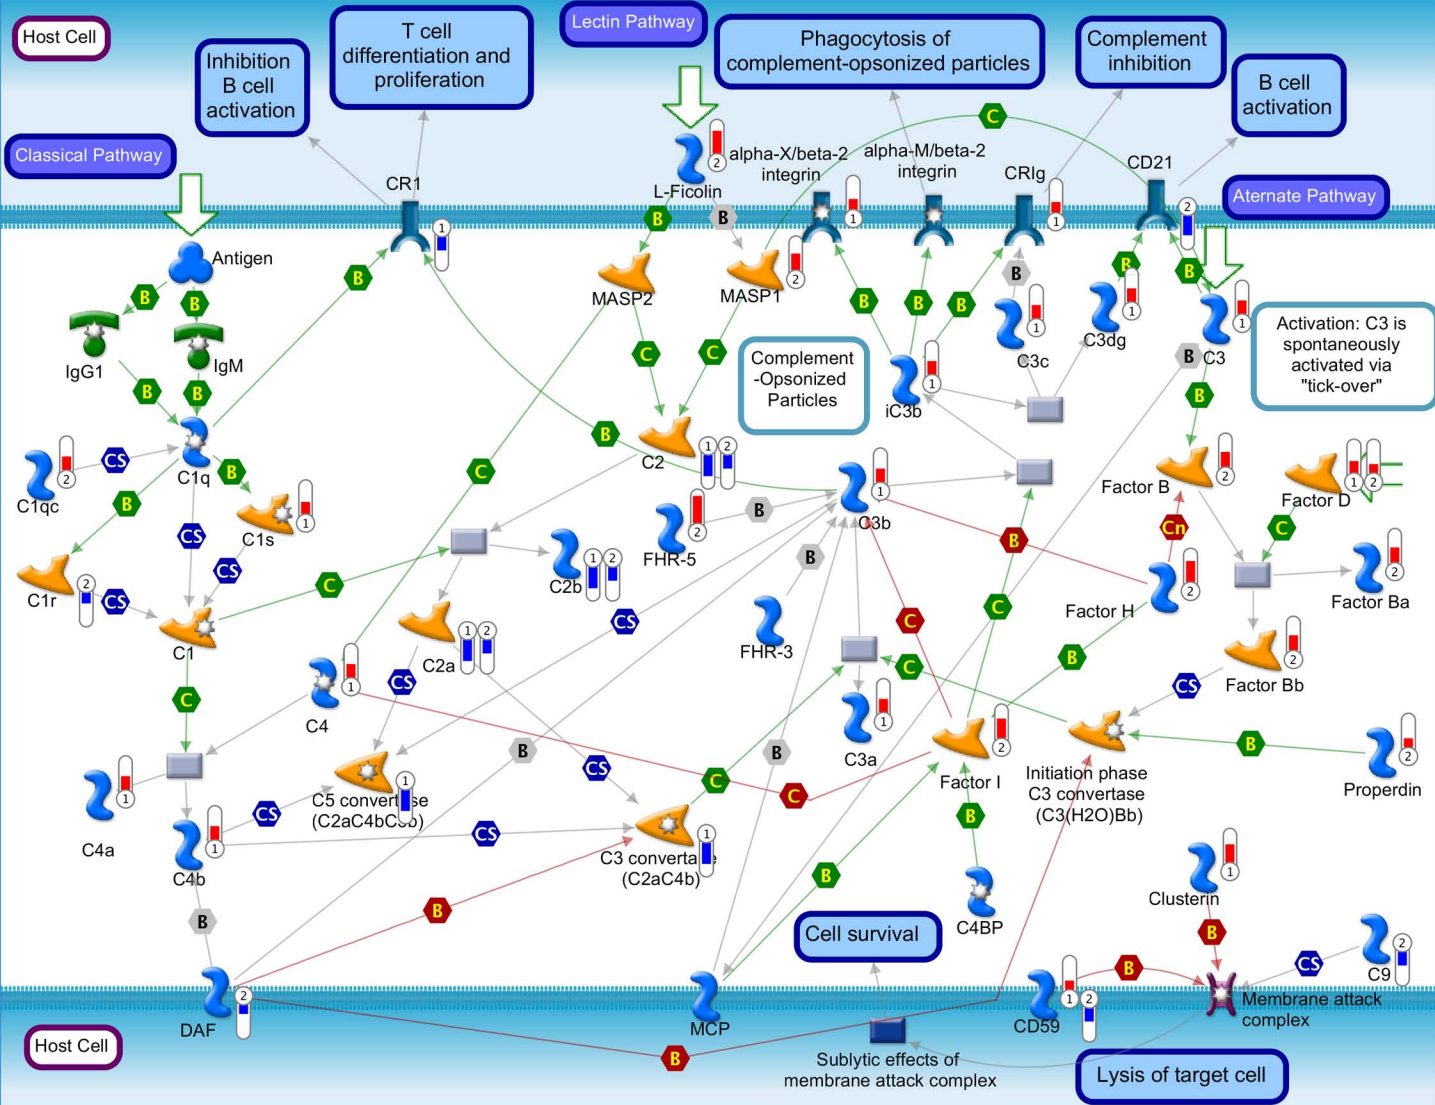

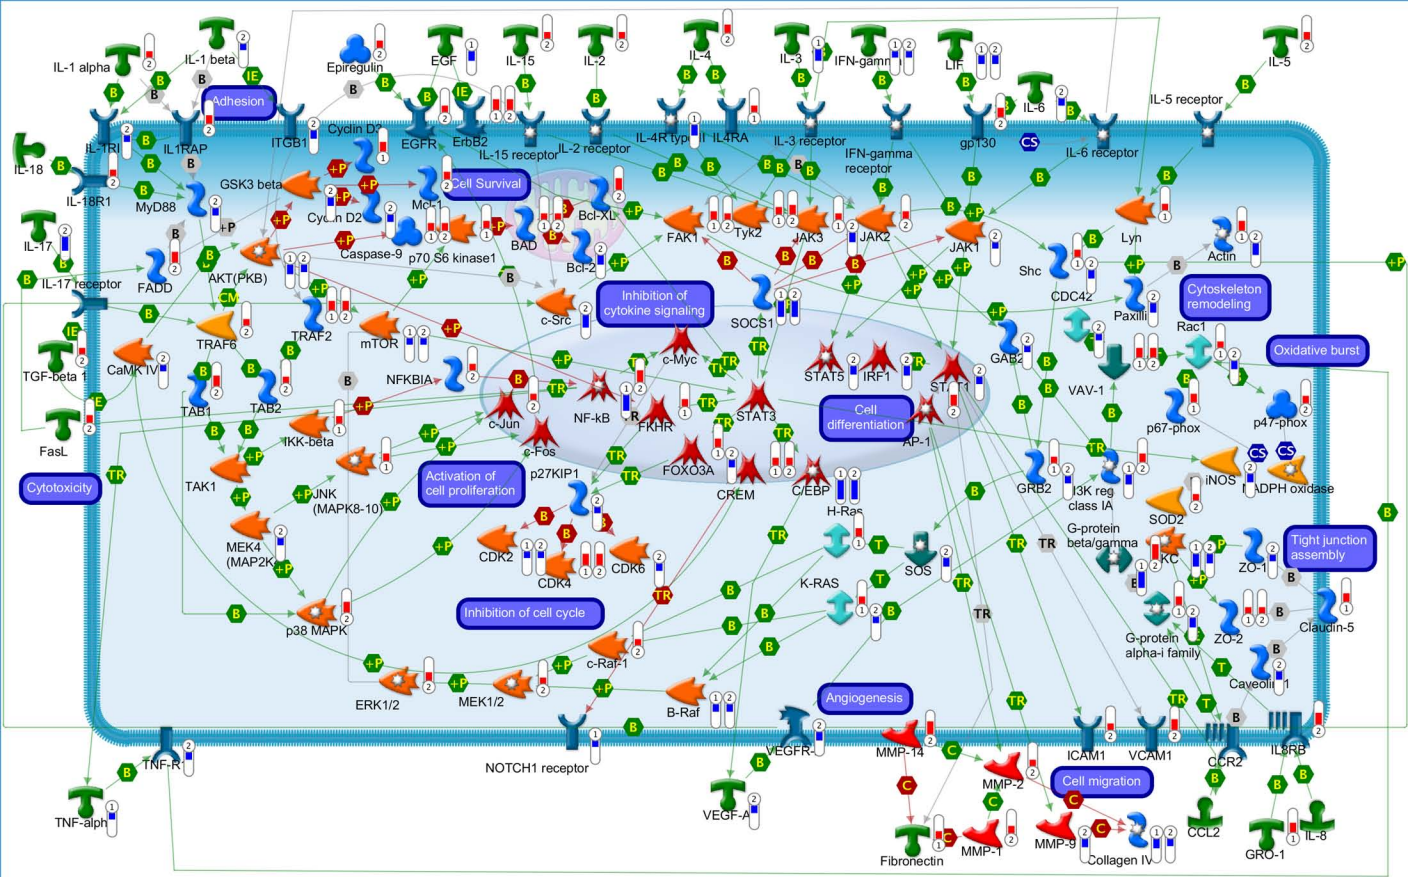

## Enzymes

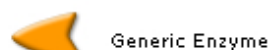

Generic Enzyme

### Kinase

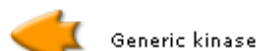

Generic kinase

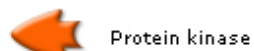

Protein kinase

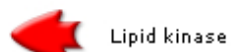

Lipid kinase

### Phosphatase

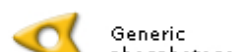

Generic phosphatase

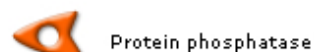

Protein phosphatase

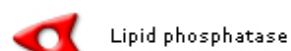

Lipid phosphatase

### Phospholipase

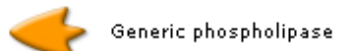

Generic phospholipase

### Protease

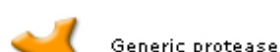

Generic protease

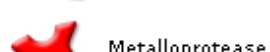

Metalloprotease

### GTPase

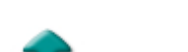

G-alpha

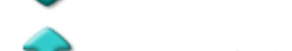

RAS - superfamily

## G protein Adaptor/regulators

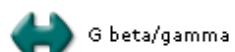

G beta/gamma

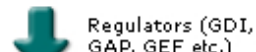

Regulators (GDI, GAP, GEF etc.)

## Channels/Transporters

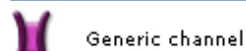

Generic channel

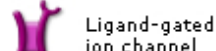

Ligand-gated ion channel

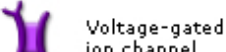

Voltage-gated ion channel

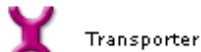

Transporter

## Blocks

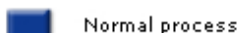

Normal process

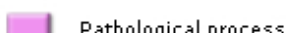

Pathological process

## Link legend

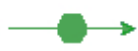

Positive effect

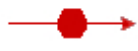

Negative effect

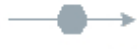

Unspecified effect

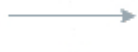

Technical link

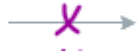

Disrupts in disease

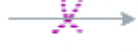

Weakens in disease

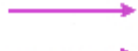

Emerges in disease

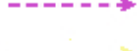

Enhances in disease

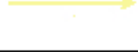

Organism specific interaction

## Generic classes

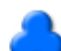

Protein

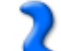

Generic binding protein

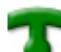

Receptor ligand

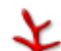

Cell membrane glycoprotein

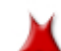

Transcription factor

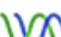

DNA

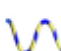

RNA

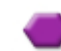

Compound

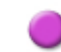

Inorganic ion

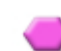

Predicted metabolite or user's structure

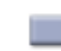

Reaction

## Receptors

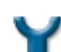

Generic receptor

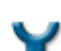

GPCR

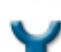

Receptors with enzyme activity

## Localization

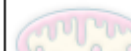

Mitochondria

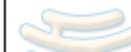

EPR

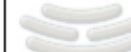

Golgi

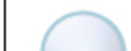

Nucleus

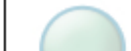

Lysosome

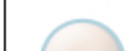

Peroxisome

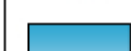

Cytoplasm

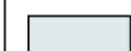

Extracellular

## Comments

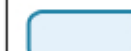

Note

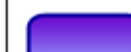

Normal process

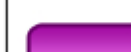

Pathological process

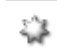

A complex or a group

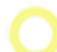

Organism specific object

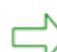

Path start

## Mechanisms

### Physical interactions

**B** Binding

**C** Cleavage

**CM** Covalent modifications

**+P** Phosphorylation

**-P** Dephosphorylation

**T** Transformation

**Tn** Transport

**Z** Catalysis

**TR** Transcription regulation

**M** MicroRNA binding

### Functional interactions

**Cn** Competition

**IE** Influence on expression

**?** Unspecified interactions

**PE** Pharmacological effect

**TE** Toxic effect

### Logical relations

**GR** Group relation

**CS** Complex subunit

**SR** Similarity relation

Expression ratio  
(SALS/control)

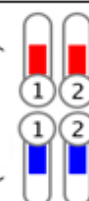

up-regulation

SALS cluster

down-regulation

Supplementary Table 1. Pathway enrichment analysis on the entire list of statistically deregulated genes in SALS patients versus controls.

| #  | Maps                                                                                                     | pValue    | FDR       | Ratio |
|----|----------------------------------------------------------------------------------------------------------|-----------|-----------|-------|
| 1  | Thrombopoietin signaling via JAK-STAT pathway                                                            | 2.591E-04 | 3.388E-02 | 3/22  |
| 2  | <b>Huntingtin-dependent transcription deregulation in Huntington's Disease</b>                           | 3.378E-04 | 3.388E-02 | 3/24  |
| 3  | <b>Immune response_IL-4-induced regulators of cell growth, survival, differentiation and metabolism</b>  | 4.600E-04 | 3.388E-02 | 4/63  |
| 4  | <b>Signal transduction_JNK pathway</b>                                                                   | 2.463E-03 | 1.361E-01 | 3/47  |
| 5  | Prolactin receptor signaling                                                                             | 4.483E-03 | 1.781E-01 | 3/58  |
| 6  | <b>Cytokines and Chemokines signaling</b>                                                                | 6.075E-03 | 1.781E-01 | 4/127 |
| 7  | <b>Immune response_Oncostatin M signaling via JAK-Stat</b>                                               | 7.008E-03 | 1.781E-01 | 2/22  |
| 8  | <b>Immune response_IL-6 signaling pathway via JAK/STAT</b>                                               | 8.186E-03 | 1.781E-01 | 3/72  |
| 9  | <b>Role of Parkin in the Ubiquitin-Proteasomal Pathway</b>                                               | 8.311E-03 | 1.781E-01 | 2/24  |
| 10 | Glucocorticoid receptor signaling                                                                        | 9.001E-03 | 1.781E-01 | 2/25  |
| 11 | Mitogenic action of Estradiol / ESR1 (nuclear) in breast cancer                                          | 1.122E-02 | 1.781E-01 | 2/28  |
| 12 | Cell cycle_Role of SCF complex in cell cycle regulation                                                  | 1.200E-02 | 1.781E-01 | 2/29  |
| 13 | Role of Diethylhexyl Phthalate and Tributyltin in fat cell differentiation                               | 1.200E-02 | 1.781E-01 | 2/29  |
| 14 | Development_G-CSF-induced myeloid differentiation                                                        | 1.281E-02 | 1.781E-01 | 2/30  |
| 15 | <b>PTMs in IL-23 signaling pathway</b>                                                                   | 1.365E-02 | 1.781E-01 | 2/31  |
| 16 | Putative pathways for stimulation of fat cell differentiation by Bisphenol A                             | 1.450E-02 | 1.781E-01 | 2/32  |
| 17 | Development_Transcription regulation of granulocyte development                                          | 1.450E-02 | 1.781E-01 | 2/32  |
| 18 | Oxidative stress_Role of ASK1 under oxidative stress                                                     | 1.628E-02 | 1.811E-01 | 2/34  |
| 19 | <b>Growth hormone signaling via STATs and PLC/IP3</b>                                                    | 1.721E-02 | 1.811E-01 | 2/35  |
| 20 | Role of growth factor receptors transactivation by Hyaluronic acid / CD44 signaling in tumor progression | 1.721E-02 | 1.811E-01 | 2/35  |
| 21 | <b>EPO-induced Jak-STAT pathway</b>                                                                      | 1.815E-02 | 1.824E-01 | 2/36  |
| 22 | Signal transduction_Cyclic AMP signaling                                                                 | 2.011E-02 | 1.852E-01 | 2/38  |
| 23 | Cell cycle_Regulation of G1/S transition (part 1)                                                        | 2.011E-02 | 1.852E-01 | 2/38  |
| 24 | <b>TNF-alpha-induced Caspase-8 signaling</b>                                                             | 2.536E-02 | 2.167E-01 | 2/43  |
| 25 | <b>Immune response_IL-13 signaling via JAK-STAT</b>                                                      | 2.647E-02 | 2.167E-01 | 2/44  |
| 26 | <b>Apoptosis and survival_FAS signaling cascades</b>                                                     | 2.647E-02 | 2.167E-01 | 2/44  |
| 27 | <b>Signal transduction_PTMs in IL-12 signaling pathway</b>                                               | 3.111E-02 | 2.455E-01 | 2/48  |
| 28 | <b>TGF-beta receptor signaling</b>                                                                       | 3.353E-02 | 2.556E-01 | 2/50  |
| 29 | <b>Signal transduction_PKA signaling</b>                                                                 | 3.478E-02 | 2.562E-01 | 2/51  |
| 30 | Development_Differentiation of white adipocytes                                                          | 3.731E-02 | 2.660E-01 | 2/53  |
| 31 | Tricarboxylic acid cycle                                                                                 | 4.125E-02 | 2.762E-01 | 2/56  |
| 32 | Development_Keratinocyte differentiation                                                                 | 4.125E-02 | 2.762E-01 | 2/56  |
| 33 | <b>Immune response_IL-5 signaling via JAK/STAT</b>                                                       | 4.259E-02 | 2.768E-01 | 2/57  |
| 34 | IGF family signaling in colorectal cancer                                                                | 4.672E-02 | 2.869E-01 | 2/60  |
| 35 | Regulation of lipid metabolism_G-alpha(q) regulation of lipid metabolism                                 | 4.813E-02 | 2.869E-01 | 2/61  |
| 36 | Cell adhesion_Role of CDK5 in cell adhesion                                                              | 5.073E-02 | 2.869E-01 | 1/9   |
| 37 | <b>Immune response_IFN-alpha/beta signaling via JAK/STAT</b>                                             | 5.245E-02 | 2.869E-01 | 2/64  |
| 38 | Renal tubulointerstitial injury in Lupus Nephritis                                                       | 5.392E-02 | 2.869E-01 | 2/65  |
| 39 | Ligand-independent activation of Androgen receptor in Prostate Cancer                                    | 5.690E-02 | 2.869E-01 | 2/67  |
| 40 | Development_Role of nicotinamide in G-CSF-induced granulopoiesis                                         | 6.707E-02 | 3.294E-01 | 1/12  |
| 41 | <b>Immune response_IFN-alpha/beta signaling via MAPKs</b>                                                | 7.263E-02 | 3.417E-01 | 2/77  |
| 42 | Cell cycle_Nucleocytoplasmic transport of CDK/Cyclins                                                    | 7.781E-02 | 3.417E-01 | 1/14  |
| 43 | Glycolysis and gluconeogenesis                                                                           | 8.958E-02 | 3.417E-01 | 2/87  |
| 44 | DNA damage_Role of SUMO in p53 regulation                                                                | 9.369E-02 | 3.417E-01 | 1/17  |
| 45 | GTP-XTF metabolism                                                                                       | 9.487E-02 | 3.417E-01 | 2/90  |
| 46 | Transcription_Assembly of RNA Polymerase II preinitiation complex on TATA-less promoters                 | 9.892E-02 | 3.417E-01 | 1/18  |
| 47 | <b>Immune response_IL-3 signaling via JAK/STAT, p38, JNK and NF-kB</b>                                   | 1.003E-01 | 3.417E-01 | 2/93  |
| 48 | <b>Immune response_IFN-alpha/beta signaling via PI3K and NF-kB pathways</b>                              | 1.021E-01 | 3.417E-01 | 2/94  |
| 49 | <b>NOTCH-induced EMT</b>                                                                                 | 1.041E-01 | 3.417E-01 | 1/19  |
| 50 | Protein folding_Membrane trafficking and signal transduction of G-alpha (i) heterotrimeric G-protein     | 1.041E-01 | 3.417E-01 | 1/19  |

Supplementary Table 2. Pathway enrichment analysis on the entire list of statistically deregulated genes in SALS1 (n=4485) and SALS2 (16144) patients compared to controls.

| #  | Maps                                                                                                                    | pValue               | min(pValue) | FDR                  | Ratio            |
|----|-------------------------------------------------------------------------------------------------------------------------|----------------------|-------------|----------------------|------------------|
| 1  | Cytoskeleton remodeling_TGF, WNT and cytoskeletal remodeling                                                            | 2.54E-09<br>3.15E-13 | 3.15E-13    | 3.70E-07<br>3.54E-11 | 37/111<br>72/111 |
| 2  | Cytoskeleton remodeling_Cytoskeleton remodeling                                                                         | 1.70E-06<br>3.63E-12 | 3.63E-12    | 9.52E-05<br>3.63E-10 | 30/102<br>66/102 |
| 3  | Transport_Clathrin-coated vesicle cycle                                                                                 | 8.65E-03<br>3.38E-10 | 3.38E-10    | 3.69E-02<br>2.77E-08 | 16/71<br>48/71   |
| 4  | Signal transduction_mTORC1 downstream signaling                                                                         | 5.61E-05<br>1.82E-09 | 1.82E-09    | 1.26E-03<br>1.37E-07 | 19/61<br>42/61   |
| 5  | Normal and pathological TGF-beta-mediated regulation of cell proliferation                                              | 1.10E-03<br>3.05E-09 | 3.05E-09    | 9.62E-03<br>2.10E-07 | 14/33<br>27/33   |
| 6  | Development_Positive regulation of STK3/4 (Hippo) pathway and negative regulation of YAP/TAZ function                   | 1.17E-03<br>3.26E-09 | 3.26E-09    | 9.87E-03<br>2.10E-07 | 18/70<br>46/70   |
| 7  | Neurogenesis_NGF/ TrkA MAPK-mediated signaling                                                                          | 4.23E-02<br>3.79E-09 | 3.79E-09    | 1.13E-01<br>2.12E-07 | 19/105<br>62/105 |
| 8  | Development_Regulation of cytoskeleton proteins in oligodendrocyte differentiation and myelination                      | 2.55E-05<br>4.13E-09 | 4.13E-09    | 6.75E-04<br>2.12E-07 | 19/58<br>40/58   |
| 9  | Neurophysiological process_Dynein-dynactin motor complex in axonal transport in neurons                                 | 3.88E-07<br>4.14E-09 | 4.14E-09    | 3.77E-05<br>2.12E-07 | 21/54<br>38/54   |
| 10 | Immune response_M-CSF-receptor signaling pathway                                                                        | 9.98E-02<br>4.24E-09 | 4.24E-09    | 2.08E-01<br>2.12E-07 | 14/81<br>51/81   |
| 11 | Cytokine-mediated regulation of megakaryopoiesis                                                                        | 2.30E-03<br>9.20E-09 | 9.20E-09    | 1.52E-02<br>4.36E-07 | 15/57<br>39/57   |
| 12 | G-protein signaling_RhoA regulation pathway                                                                             | 1.04E-01<br>1.04E-08 | 1.04E-08    | 2.15E-01<br>4.44E-07 | 7/34<br>27/34    |
| 13 | Chemotaxis_CXCR4 signaling pathway                                                                                      | 5.13E-03<br>1.04E-08 | 1.04E-08    | 2.55E-02<br>4.44E-07 | 10/34<br>27/34   |
| 14 | Development_WNT signaling pathway. Part 1. Degradation of beta-catenin in the absence WNT signaling                     | 6.79E-02<br>1.12E-08 | 1.12E-08    | 1.54E-01<br>4.56E-07 | 5/19<br>18/19    |
| 15 | Apoptosis and survival_NGF/ TrkA PI3K-mediated signaling                                                                | 1.10E-07<br>1.94E-08 | 1.94E-08    | 1.21E-05<br>7.35E-07 | 27/77<br>48/77   |
| 16 | Development_Prolactin receptor signaling                                                                                | 3.96E-02<br>1.96E-08 | 1.96E-08    | 1.08E-01<br>7.35E-07 | 12/58<br>39/58   |
| 17 | Immune response_IL-3 signaling via ERK and PI3K                                                                         | 1.84E-03<br>2.60E-08 | 2.60E-08    | 1.30E-02<br>9.17E-07 | 23/102<br>59/102 |
| 18 | LRRK2 in neurons in Parkinson's disease                                                                                 | 1.74E-06<br>2.65E-08 | 2.65E-08    | 9.52E-05<br>9.17E-07 | 15/33<br>26/33   |
| 19 | Cell adhesion_Chemokines and adhesion                                                                                   | 1.07E-06<br>2.98E-08 | 2.98E-08    | 7.81E-05<br>9.94E-07 | 30/100<br>58/100 |
| 20 | Immune response_Oncostatin M signaling via MAPK                                                                         | 1.47E-01<br>3.65E-08 | 3.65E-08    | 2.73E-01<br>1.17E-06 | 7/37<br>28/37    |
| 21 | Immune response_IL-6 signaling pathway via JAK/STAT                                                                     | 4.20E-03<br>4.79E-08 | 4.79E-08    | 2.24E-02<br>1.49E-06 | 17/72<br>45/72   |
| 22 | Signal transduction_mTORC2 downstream signaling                                                                         | 5.60E-03<br>5.80E-08 | 5.80E-08    | 2.69E-02<br>1.74E-06 | 16/68<br>43/68   |
| 23 | Transcription_Transcription regulation of aminoacid metabolism                                                          | 1.72E-01<br>7.82E-08 | 7.82E-08    | 2.99E-01<br>2.27E-06 | 5/25<br>21/25    |
| 24 | Immune response_Antigen presentation by MHC class I, classical pathway                                                  | 1.27E-03<br>9.68E-08 | 9.68E-08    | 1.05E-02<br>2.72E-06 | 15/54<br>36/54   |
| 25 | Signal transduction_Activation of PKC via G-Protein coupled receptor                                                    | 8.30E-04<br>1.01E-07 | 1.01E-07    | 8.54E-03<br>2.76E-06 | 15/52<br>35/52   |
| 26 | Immune response_Role of PKR in stress-induced antiviral cell response                                                   | 7.83E-04<br>1.83E-07 | 1.83E-07    | 8.25E-03<br>4.83E-06 | 16/57<br>37/57   |
| 27 | Tau pathology in Alzheimer disease                                                                                      | 2.71E-02<br>1.96E-07 | 1.96E-07    | 8.30E-02<br>5.04E-06 | 12/55<br>36/55   |
| 28 | Immune response_HMGB1/RAGE signaling pathway                                                                            | 8.31E-03<br>2.09E-07 | 2.09E-07    | 3.60E-02<br>5.21E-06 | 13/53<br>35/53   |
| 29 | IL-6 signaling in multiple myeloma                                                                                      | 1.53E-02<br>2.20E-07 | 2.20E-07    | 5.37E-02<br>5.36E-06 | 12/51<br>34/51   |
| 30 | Regulation of degradation of deltaF508-CFTR in CF                                                                       | 2.10E-05<br>2.41E-07 | 2.41E-07    | 6.12E-04<br>5.71E-06 | 15/39<br>28/39   |
| 31 | Immune response_IL-3 signaling via JAK/STAT, p38, JNK and NF-kB                                                         | 7.27E-06<br>2.58E-07 | 2.58E-07    | 2.89E-04<br>5.94E-06 | 27/93<br>53/93   |
| 32 | Aberrant production of IL-2 and IL-17 in SLE T cells                                                                    | 9.63E-04<br>3.53E-07 | 3.53E-07    | 9.06E-03<br>7.85E-06 | 16/58<br>37/58   |
| 33 | DeltaF508-CFTR traffic / Sorting endosome formation in CF                                                               | 6.69E-01<br>3.57E-07 | 3.57E-07    | 8.24E-01<br>7.85E-06 | 22/28<br>3/28    |
| 34 | Immune response_IL-4 signaling pathway                                                                                  | 5.61E-04<br>4.12E-07 | 4.12E-07    | 6.55E-03<br>8.82E-06 | 23/94<br>53/94   |
| 35 | Ligand-independent activation of Androgen receptor in Prostate Cancer                                                   | 5.70E-06<br>4.33E-07 | 4.33E-07    | 2.52E-04<br>9.06E-06 | 22/67<br>41/67   |
| 36 | Development_TGF-beta-dependent induction of EMT via RhoA, PI3K and ILK                                                  | 4.59E-07<br>2.91E-02 | 4.59E-07    | 4.02E-05<br>5.22E-02 | 19/46<br>21/46   |
| 37 | Signal transduction_ERK1/2 signaling pathway                                                                            | 1.06E-02<br>4.74E-07 | 4.74E-07    | 4.16E-02<br>9.44E-06 | 9/32<br>24/32    |
| 38 | Development_Adenosine A2B receptor signaling                                                                            | 1.68E-03<br>4.75E-07 | 4.75E-07    | 1.25E-02<br>9.44E-06 | 14/50<br>33/50   |
| 39 | Immune response_Antigen presentation by MHC class I: cross-presentation                                                 | 4.97E-04<br>4.82E-07 | 4.82E-07    | 6.26E-03<br>9.44E-06 | 24/99<br>55/99   |
| 40 | Development_Epigenetic and transcriptional regulation of oligodendrocyte precursor cell differentiation and myelination | 1.45E-03<br>5.15E-07 | 5.15E-07    | 1.11E-02<br>9.81E-06 | 11/34<br>25/34   |
| 41 | Immune response_IL-6 signaling pathway via MEK/ERK and PI3K/AKT cascades                                                | 5.65E-03<br>5.26E-07 | 5.26E-07    | 2.69E-02<br>9.81E-06 | 17/74<br>44/74   |
| 42 | Development_EPO-induced Jak-STAT pathway                                                                                | 5.90E-02<br>5.43E-07 | 5.43E-07    | 1.40E-01<br>9.81E-06 | 8/36<br>26/36    |
| 43 | K-RAS signaling in pancreatic cancer                                                                                    | 7.34E-02<br>5.45E-07 | 5.45E-07    | 1.64E-01<br>9.81E-06 | 9/44<br>30/44    |
| 44 | Action of GSK3 beta in bipolar disorder                                                                                 | 2.94E-01<br>5.65E-07 | 5.65E-07    | 4.44E-01<br>9.98E-06 | 4/23<br>19/23    |
| 45 | Some pathways of EMT in cancer cells                                                                                    | 6.25E-07             | 6.25E-07    | 4.97E-05             | 20/51            |

|    |                                                                                             |          |          |          |       |
|----|---------------------------------------------------------------------------------------------|----------|----------|----------|-------|
| 45 | Some pathways of EMT in cancer cells                                                        | 1.34E-05 | 9.29E-07 | 1.15E-04 | 31/51 |
| 46 | Neurophysiological process_GABA-A receptor life cycle                                       | 3.57E-02 | 9.04E-07 | 1.01E-01 | 7/27  |
|    |                                                                                             | 9.04E-07 |          | 1.57E-05 | 21/27 |
| 47 | Development_Regulation of epithelial-to-mesenchymal transition (EMT)                        | 9.38E-06 |          | 3.33E-04 | 21/64 |
|    |                                                                                             | 9.63E-07 | 9.63E-07 | 1.64E-05 | 39/64 |
| 48 | Signal transduction_JNK pathway                                                             | 7.90E-03 |          | 3.48E-02 | 12/47 |
|    |                                                                                             | 1.08E-06 | 1.08E-06 | 1.80E-05 | 31/47 |
| 49 | Cell adhesion_Histamine H1 receptor signaling in the interruption of cell barrier integrity | 1.79E-03 |          | 1.30E-02 | 13/45 |
|    |                                                                                             | 1.15E-06 | 1.15E-06 | 1.88E-05 | 30/45 |
| 50 | Cytoskeleton remodeling_Hyaluronic acid/ CD44 signaling pathways                            | 3.64E-03 |          | 2.04E-02 | 12/43 |
|    |                                                                                             | 1.20E-06 | 1.20E-06 | 1.90E-05 | 29/43 |

**Supplementary Table 3. Neuroinflammatory genes differentially expressed in SALS1.**

| Probe ID     | p Value (Corr) | p Value  | Fold Change<br>(SALS1/CTRL <sup>+</sup> )* | GENE_SYMBOL |
|--------------|----------------|----------|--------------------------------------------|-------------|
| A_23_P166051 | 2.08E-02       | 1.18E-02 | 1.47                                       | RBCK1       |
| A_23_P329573 | 3.22E-02       | 1.93E-02 | 2.17                                       | ITGB2       |
| A_24_P343233 | 1.44E-05       | 1.23E-06 | 2.20                                       | HLA-DRB1    |
| A_23_P89249  | 7.67E-04       | 2.59E-04 | 1.99                                       | ERBB2       |
| A_23_P135769 | 6.60E-05       | 1.21E-05 | 3.04                                       | ACTB        |
| A_23_P24870  | 3.85E-02       | 2.38E-02 | 2.05                                       | CD44        |
| A_23_P309739 | 2.75E-02       | 1.61E-02 | -1.46                                      | ESR1        |
| A_24_P362193 | 2.48E-05       | 2.98E-06 | -3.52                                      | CD84        |
| A_23_P158725 | 5.34E-05       | 9.11E-06 | 1.76                                       | SLC16A3     |
| A_23_P145089 | 1.26E-06       | 9.38E-09 | 3.55                                       | HSP90AB1    |
| A_24_P50759  | 4.10E-06       | 1.22E-07 | -1.40                                      | <b>TNF</b>  |
| A_23_P75283  | 1.02E-04       | 2.16E-05 | 1.93                                       | RBP4        |
| A_23_P4223   | 2.99E-06       | 5.79E-08 | 2.02                                       | CALCOCO2    |
| A_23_P79591  | 2.15E-06       | 3.16E-08 | -2.16                                      | APOB        |
| A_23_P29495  | 3.09E-05       | 4.13E-06 | 2.02                                       | CTNNB1      |
| A_24_P161933 | 7.60E-04       | 2.56E-04 | 3.87                                       | HLA-B       |
| A_23_P315571 | 6.84E-05       | 1.27E-05 | 2.10                                       | RFTN1       |
| A_23_P120947 | 7.38E-06       | 3.33E-07 | 3.05                                       | XRCC6       |
| A_23_P369237 | 2.37E-02       | 1.37E-02 | -1.39                                      | ADIPOQ      |
| A_23_P213114 | 1.46E-03       | 5.55E-04 | -4.41                                      | TEC         |
| A_24_P281101 | 8.16E-06       | 4.17E-07 | -1.91                                      | ABL1        |
| A_23_P70095  | 1.39E-02       | 7.41E-03 | 1.69                                       | CD74        |
| A_23_P101992 | 3.31E-02       | 1.99E-02 | 2.44                                       | MARCO       |
| A_23_P147875 | 2.88E-05       | 3.72E-06 | 2.12                                       | CHID1       |
| A_23_P156788 | 1.16E-02       | 6.02E-03 | -1.59                                      | STX11       |
| A_24_P123616 | 3.81E-06       | 1.01E-07 | 4.67                                       | HSPA1A      |
| A_23_P70539  | 2.05E-02       | 1.16E-02 | 2.42                                       | HLA-C       |
| A_24_P7887   | 2.54E-04       | 6.75E-05 | -1.79                                      | EP300       |
| A_23_P103361 | 1.17E-02       | 6.08E-03 | -1.48                                      | LCK         |
| A_24_P943283 | 1.43E-03       | 5.37E-04 | -1.64                                      | DENND1B     |
| A_23_P60387  | 3.63E-02       | 2.23E-02 | -1.37                                      | NOTCH1      |
| A_23_P206510 | 9.25E-06       | 5.80E-07 | 1.80                                       | GLG1        |
| A_23_P202156 | 4.66E-02       | 2.99E-02 | -1.47                                      | NFKB2       |
| A_23_P61646  | 2.05E-02       | 1.16E-02 | 1.81                                       | STX4        |
| A_23_P29036  | 5.59E-05       | 9.69E-06 | 1.71                                       | IFNGR2      |
| A_24_P390495 | 1.27E-02       | 6.69E-03 | 1.62                                       | CX3CL1      |
| A_24_P254079 | 6.81E-03       | 3.31E-03 | 2.10                                       | ICAM5       |
| A_23_P215913 | 1.03E-05       | 6.92E-07 | 3.90                                       | CLU         |
| A_23_P98183  | 1.68E-03       | 6.55E-04 | 2.13                                       | HRAS        |
| A_24_P360674 | 8.53E-06       | 4.75E-07 | -4.42                                      | CDKN2B      |
| A_23_P81912  | 5.03E-06       | 1.64E-07 | 2.33                                       | TUBB        |
| A_23_P151294 | 1.01E-06       | 3.77E-09 | -1.80                                      | IFNG        |
| A_23_P92499  | 1.86E-03       | 7.38E-04 | 2.06                                       | TLR2        |
| A_24_P287043 | 8.52E-05       | 1.70E-05 | 2.49                                       | IFITM2      |
| A_23_P99452  | 5.88E-06       | 2.02E-07 | -1.75                                      | BRCA2       |
| A_32_P139894 | 1.91E-05       | 1.93E-06 | 1.74                                       | ABL2        |

|              |          |          |       |            |
|--------------|----------|----------|-------|------------|
| A_23_P65442  | 7.26E-05 | 1.37E-05 | 1.86  | IRF9       |
| A_24_P28295  | 1.44E-04 | 3.29E-05 | 1.97  | RABGAP1L   |
| A_24_P175059 | 6.57E-04 | 2.16E-04 | 1.48  | ATG5       |
| A_23_P140916 | 4.24E-06 | 1.30E-07 | 2.17  | GLG1       |
| A_23_P410998 | 2.60E-02 | 1.52E-02 | 2.34  | RAB5B      |
| A_32_P78528  | 7.74E-06 | 3.69E-07 | 2.89  | TUBB       |
| A_23_P428738 | 3.46E-03 | 1.52E-03 | 1.56  | <b>ANG</b> |
| A_23_P29994  | 8.12E-06 | 4.08E-07 | 2.08  | RBPJ       |
| A_32_P204381 | 2.72E-03 | 1.16E-03 | 2.00  | CIAPIN1    |
| A_23_P101683 | 2.49E-02 | 1.45E-02 | -1.96 | CLC        |
| A_23_P26777  | 1.16E-03 | 4.21E-04 | 2.02  | NUP85      |
| A_23_P42935  | 1.37E-02 | 7.30E-03 | -1.32 | BRAF       |
| A_23_P57927  | 1.89E-02 | 1.06E-02 | 1.59  | HYAL2      |
| A_32_P120977 | 8.16E-06 | 4.15E-07 | 1.64  | PRELID1    |
| A_24_P134683 | 1.12E-05 | 7.84E-07 | 3.38  | BCAP31     |
| A_23_P6836   | 3.63E-02 | 2.23E-02 | 3.23  | IP6K2      |
| A_24_P69654  | 2.22E-06 | 3.44E-08 | 2.51  | KLF6       |
| A_24_P304549 | 1.55E-02 | 8.47E-03 | 3.13  | LAMP1      |
| A_23_P358370 | 3.21E-02 | 1.93E-02 | -1.93 | FOXEO      |
| A_32_P194062 | 1.52E-05 | 1.37E-06 | -7.05 | TYR        |
| A_23_P121253 | 1.57E-02 | 8.57E-03 | -1.40 | TNFSF10    |
| A_23_P145264 | 9.01E-06 | 5.46E-07 | 2.63  | HLA-F      |
| A_23_P81241  | 1.41E-05 | 1.17E-06 | 1.91  | NDFIP1     |
| A_23_P408353 | 4.10E-05 | 6.25E-06 | 2.70  | HLA-A      |
| A_23_P167493 | 3.31E-05 | 4.66E-06 | 2.80  | CARTPT     |
| A_23_P25235  | 3.72E-03 | 1.65E-03 | -2.93 | CLEC4D     |
| A_23_P501232 | 5.03E-04 | 1.58E-04 | 1.94  | KCNAB2     |
| A_23_P134100 | 6.34E-03 | 3.05E-03 | -1.78 | ULBP3      |
| A_24_P214506 | 4.82E-03 | 2.23E-03 | 2.64  | SEC13      |
| A_23_P113716 | 7.07E-06 | 2.91E-07 | 2.11  | HLA-C      |
| A_23_P205746 | 9.69E-06 | 6.30E-07 | 1.71  | EML1       |
| A_23_P252471 | 2.73E-06 | 5.12E-08 | 1.98  | PECAM1     |
| A_24_P48078  | 4.12E-04 | 1.23E-04 | 1.76  | CYLD       |
| A_23_P39040  | 2.58E-02 | 1.50E-02 | 2.48  | SMARCA4    |
| A_32_P157228 | 2.00E-02 | 1.13E-02 | -3.63 | AHCTF1     |
| A_24_P15270  | 1.64E-05 | 1.53E-06 | 2.10  | BCR        |
| A_23_P375147 | 1.71E-04 | 4.10E-05 | 1.75  | RC3H2      |
| A_24_P235643 | 3.55E-04 | 1.02E-04 | 2.09  | CUEDC2     |
| A_23_P46844  | 2.34E-03 | 9.65E-04 | 1.72  | TRIM8      |
| A_23_P68511  | 9.72E-04 | 3.44E-04 | -3.63 | ANGPT4     |
| A_23_P147431 | 8.91E-04 | 3.09E-04 | 1.52  | LYN        |
| A_23_P130815 | 3.40E-03 | 1.49E-03 | -1.84 | KIR2DS2    |
| A_24_P229055 | 2.37E-02 | 1.37E-02 | 2.10  | SEMA4D     |
| A_23_P55802  | 1.94E-05 | 1.97E-06 | 1.48  | AP1M1      |
| A_23_P143178 | 6.00E-03 | 2.86E-03 | -3.71 | LBP        |
| A_23_P217866 | 2.20E-04 | 5.58E-05 | 1.84  | IFI16      |
| A_24_P276853 | 1.29E-03 | 4.79E-04 | 2.01  | GON4L      |
| A_23_P314024 | 3.40E-05 | 4.87E-06 | 2.47  | HLA-F      |
| A_23_P160720 | 1.38E-03 | 5.16E-04 | 1.62  | BATF3      |
| A_24_P252078 | 1.81E-02 | 1.01E-02 | 1.63  | BTN3A2     |

|              |          |          |       |             |
|--------------|----------|----------|-------|-------------|
| A_24_P766716 | 2.55E-02 | 1.48E-02 | 1.72  | CMKLR1      |
| A_23_P250825 | 5.40E-03 | 2.54E-03 | 1.56  | RABGEF1     |
| A_23_P162918 | 1.30E-02 | 6.90E-03 | 3.29  | SERPINA3    |
| A_24_P303091 | 8.31E-05 | 1.64E-05 | -4.26 | CXCL10      |
| A_23_P207582 | 7.09E-06 | 2.99E-07 | -3.23 | CCL16       |
| A_23_P57856  | 1.10E-04 | 2.38E-05 | 2.09  | <b>BCL6</b> |
| A_24_P264664 | 2.43E-05 | 2.84E-06 | 2.05  | CHD2        |
| A_24_P363005 | 1.67E-06 | 1.73E-08 | 2.37  | UBE2D3      |
| A_24_P103469 | 4.54E-03 | 2.08E-03 | 1.98  | LST1        |
| A_24_P791515 | 1.66E-05 | 1.58E-06 | 1.93  | SYNCRIP     |
| A_23_P2873   | 1.17E-05 | 8.44E-07 | 2.69  | KLC1        |
| A_23_P214821 | 7.10E-04 | 2.37E-04 | 3.82  | EDN1        |
| A_23_P18490  | 1.66E-03 | 6.44E-04 | 1.89  | MAEA        |
| A_23_P164035 | 1.98E-05 | 2.04E-06 | 3.38  | PSMC5       |
| A_32_P232865 | 6.76E-03 | 3.28E-03 | 3.14  | BCR         |
| A_23_P25644  | 6.68E-07 | 8.25E-10 | 1.69  | PCID2       |
| A_24_P233960 | 1.19E-05 | 8.67E-07 | 2.27  | SNX27       |
| A_23_P39088  | 3.77E-04 | 1.10E-04 | 1.96  | PRMT1       |
| A_23_P303149 | 1.71E-04 | 4.10E-05 | 1.83  | FGFR2       |
| A_23_P252163 | 2.93E-02 | 1.74E-02 | 1.67  | DAPK1       |
| A_24_P245322 | 3.96E-03 | 1.77E-03 | 2.39  | PRKAR1A     |
| A_23_P79161  | 3.88E-06 | 1.11E-07 | 1.54  | PRELID1     |
| A_23_P166633 | 1.22E-05 | 9.06E-07 | 1.86  | ITGB5       |
| A_24_P87763  | 1.60E-04 | 3.77E-05 | 3.16  | EEF2        |
| A_24_P322635 | 1.93E-03 | 7.74E-04 | 2.20  | ELMO2       |
| A_23_P87379  | 1.67E-03 | 6.49E-04 | 2.46  | PDE2A       |
| A_23_P155632 | 3.65E-03 | 1.62E-03 | -2.86 | CD80        |
| A_23_P28434  | 3.87E-04 | 1.14E-04 | 1.94  | VAMP8       |
| A_23_P104318 | 3.67E-05 | 5.37E-06 | 1.98  | DDIT4       |
| A_32_P72822  | 4.25E-05 | 6.53E-06 | -2.65 | CCNB2       |
| A_23_P134237 | 1.09E-03 | 3.95E-04 | 2.77  | RARRES2     |
| A_23_P101960 | 4.41E-03 | 2.01E-03 | 2.72  | ZFP36L2     |
| A_23_P56195  | 6.68E-07 | 1.26E-09 | 1.58  | UBA52       |
| A_23_P435501 | 9.88E-05 | 2.07E-05 | 2.16  | SERINC3     |
| A_23_P55319  | 3.77E-04 | 1.10E-04 | 1.67  | FLOT2       |
| A_23_P203053 | 2.04E-03 | 8.20E-04 | 1.70  | NCAM1       |
| A_23_P30122  | 4.59E-06 | 1.48E-07 | -1.83 | IL2         |
| A_24_P319354 | 1.79E-02 | 9.93E-03 | 2.06  | SUMO1       |
| A_24_P337657 | 1.45E-04 | 3.32E-05 | 1.90  | SRF         |
| A_24_P397043 | 1.49E-05 | 1.31E-06 | -1.83 | ST6GAL1     |
| A_23_P169331 | 1.37E-02 | 7.28E-03 | 1.78  | TRAF2       |
| A_23_P203994 | 1.66E-06 | 1.49E-08 | 1.99  | PSMD9       |
| A_23_P47135  | 2.97E-05 | 3.88E-06 | 1.97  | NR1H3       |
| A_23_P130531 | 1.22E-02 | 6.39E-03 | 2.86  | CDC37       |
| A_24_P222655 | 1.03E-02 | 5.29E-03 | 2.90  | C1QA        |
| A_32_P70158  | 2.52E-02 | 1.46E-02 | 2.70  | LILRB3      |
| A_24_P391568 | 2.87E-02 | 1.70E-02 | 1.90  | ARNT        |
| A_32_P217709 | 4.24E-06 | 1.29E-07 | 2.37  | RAC1        |
| A_32_P231446 | 1.44E-05 | 1.22E-06 | 2.03  | HIPK1       |
| A_23_P151614 | 5.97E-03 | 2.84E-03 | -3.00 | PSME1       |

|              |          |          |       |                 |
|--------------|----------|----------|-------|-----------------|
| A_32_P178800 | 8.83E-06 | 5.17E-07 | -5.15 | ITGA2           |
| A_24_P262355 | 1.62E-04 | 3.81E-05 | 2.30  | PHB             |
| A_24_P259490 | 1.45E-03 | 5.50E-04 | 1.94  | ARF1            |
| A_24_P91310  | 2.28E-05 | 2.55E-06 | 2.27  | PSMC4           |
| A_24_P823684 | 4.51E-05 | 7.12E-06 | 2.31  | HSP90AB1        |
| A_23_P433071 | 3.88E-06 | 1.08E-07 | 2.03  | BECN1           |
| A_23_P80398  | 1.13E-03 | 4.10E-04 | 2.01  | NCAPH2          |
| A_23_P300150 | 1.24E-03 | 4.57E-04 | 1.88  | NFATC1          |
| A_24_P289726 | 5.90E-04 | 1.90E-04 | 2.62  | PSMD3           |
| A_32_P351968 | 8.98E-03 | 4.52E-03 | 2.69  | HLA-DMB         |
| A_23_P67708  | 8.75E-03 | 4.39E-03 | 1.81  | TCF3            |
| A_23_P81399  | 7.60E-06 | 3.51E-07 | 2.94  | <b>SQSTM1</b>   |
| A_24_P944827 | 1.81E-02 | 1.01E-02 | 1.53  | ATG7            |
| A_32_P86289  | 2.16E-02 | 1.23E-02 | -3.27 | CYP19A1         |
| A_23_P116371 | 4.99E-02 | 3.22E-02 | -5.29 | MS4A1           |
| A_24_P132518 | 2.05E-05 | 2.16E-06 | 1.83  | IKBKB           |
| A_23_P153311 | 2.03E-03 | 8.14E-04 | 1.74  | TYK2            |
| A_23_P38346  | 8.68E-06 | 4.99E-07 | 1.98  | DHX58           |
| A_23_P31921  | 4.35E-03 | 1.98E-03 | 2.69  | ASS1            |
| A_23_P42282  | 3.07E-05 | 4.08E-06 | 2.77  | C4B             |
| A_24_P351852 | 4.49E-03 | 2.05E-03 | -1.69 | LAT2            |
| A_23_P201086 | 2.14E-03 | 8.67E-04 | 3.31  | ARF1            |
| A_23_P142380 | 6.68E-07 | 9.44E-10 | 1.79  | AKAP8           |
| A_23_P107565 | 2.37E-04 | 6.09E-05 | 3.73  | AQP4            |
| A_23_P12168  | 1.26E-06 | 9.20E-09 | 2.88  | PSMD4           |
| A_23_P18901  | 5.14E-04 | 1.63E-04 | 1.78  | ATG12           |
| A_23_P206960 | 7.26E-05 | 1.36E-05 | 1.66  | SEC14L1         |
| A_23_P257365 | 5.55E-03 | 2.62E-03 | -3.12 | GFI1            |
| A_23_P115200 | 9.67E-04 | 3.42E-04 | -4.34 | FCRL4           |
| A_23_P79911  | 1.23E-05 | 9.29E-07 | 2.14  | PSMF1           |
| A_23_P58443  | 1.88E-04 | 4.58E-05 | 2.09  | ANKHD1-EIF4EBP3 |
| A_23_P2492   | 9.50E-05 | 1.98E-05 | 2.59  | C1S             |
| A_23_P61149  | 2.19E-03 | 8.92E-04 | 1.73  | INPP5D          |
| A_23_P18903  | 6.47E-04 | 2.12E-04 | 1.91  | HAVCR2          |
| A_23_P137366 | 2.67E-04 | 7.22E-05 | 3.82  | C1QB            |
| A_23_P75889  | 2.43E-05 | 2.84E-06 | 2.11  | PSMD13          |
| A_23_P55706  | 3.40E-06 | 7.70E-08 | 1.82  | RELB            |
| A_32_P228775 | 4.99E-02 | 3.23E-02 | 2.10  | PPP4R2          |
| A_23_P122116 | 1.44E-02 | 7.79E-03 | 2.17  | DDX41           |
| A_23_P70843  | 2.31E-05 | 2.63E-06 | 1.85  | BPGM            |
| A_23_P25354  | 8.30E-03 | 4.12E-03 | 1.84  | P2RX7           |
| A_23_P7582   | 4.25E-05 | 6.57E-06 | -1.59 | TCF7            |
| A_23_P503115 | 3.52E-04 | 1.01E-04 | 1.91  | BCR             |
| A_23_P136325 | 6.22E-03 | 2.98E-03 | 1.62  | WIPF2           |
| A_32_P94798  | 3.35E-05 | 4.75E-06 | 2.82  | ANXA2           |
| A_23_P332413 | 6.00E-06 | 2.21E-07 | -5.21 | SLFN13          |
| A_23_P334892 | 4.21E-03 | 1.91E-03 | -2.38 | TMEM102         |
| A_32_P63182  | 8.68E-06 | 4.99E-07 | 2.03  | PDIA3           |
| A_23_P73429  | 1.49E-05 | 1.31E-06 | 2.13  | HCLS1           |
| A_23_P217269 | 1.58E-03 | 6.09E-04 | 2.09  | VSIG4           |

|              |          |          |       |              |
|--------------|----------|----------|-------|--------------|
| A_23_P87664  | 1.15E-02 | 5.95E-03 | 1.61  | SART3        |
| A_24_P412156 | 6.15E-05 | 1.10E-05 | -4.66 | CXCL12       |
| A_23_P155624 | 7.30E-04 | 2.45E-04 | 2.48  | AP2M1        |
| A_32_P67533  | 6.00E-06 | 2.15E-07 | 1.40  | L3MBTL3      |
| A_23_P45025  | 7.30E-06 | 3.19E-07 | 2.15  | MAPK10       |
| A_23_P39116  | 4.13E-04 | 1.23E-04 | 2.38  | LIG1         |
| A_23_P329152 | 7.56E-03 | 3.71E-03 | 2.14  | ILF3         |
| A_24_P265523 | 2.09E-02 | 1.19E-02 | -2.68 | CR1          |
| A_23_P94422  | 3.29E-05 | 4.58E-06 | -3.71 | MELK         |
| A_23_P71268  | 1.55E-03 | 5.97E-04 | 2.25  | AZGP1        |
| A_23_P70384  | 5.12E-03 | 2.38E-03 | 1.97  | RNF8         |
| A_24_P184031 | 8.21E-06 | 4.26E-07 | 2.08  | PHPT1        |
| A_23_P95917  | 2.48E-06 | 4.06E-08 | 2.94  | HLA-C        |
| A_24_P44514  | 1.96E-06 | 2.48E-08 | 2.14  | CIB1         |
| A_23_P359091 | 5.39E-03 | 2.53E-03 | 1.73  | SMAD3        |
| A_23_P119196 | 9.27E-05 | 1.92E-05 | 2.14  | KLF2         |
| A_24_P216087 | 1.62E-03 | 6.25E-04 | 2.21  | PAF1         |
| A_23_P88404  | 2.58E-03 | 1.09E-03 | 2.52  | TGFB3        |
| A_23_P59005  | 1.64E-06 | 1.41E-08 | 2.05  | TAP1         |
| A_24_P329635 | 2.86E-04 | 7.89E-05 | 1.89  | TSC1         |
| A_23_P153745 | 9.62E-03 | 4.87E-03 | 2.12  | IFI30        |
| A_23_P52761  | 6.58E-03 | 3.18E-03 | -2.65 | MMP7         |
| A_23_P375372 | 1.70E-04 | 4.05E-05 | -5.31 | FGA          |
| A_23_P101407 | 2.65E-03 | 1.12E-03 | 2.74  | C3           |
| A_23_P60180  | 1.49E-05 | 1.30E-06 | 1.67  | ABL1         |
| A_24_P365365 | 1.22E-05 | 8.92E-07 | 1.96  | TCF3         |
| A_23_P210708 | 2.30E-05 | 2.60E-06 | 2.13  | SIRPA        |
| A_24_P337592 | 9.84E-03 | 5.01E-03 | 1.61  | BTN2A2       |
| A_24_P417984 | 8.69E-05 | 1.75E-05 | 2.30  | PPP1R14B     |
| A_32_P148058 | 4.76E-03 | 2.20E-03 | -1.81 | RUNX2        |
| A_24_P50950  | 2.67E-05 | 3.31E-06 | -4.17 | CCDC88B      |
| A_24_P206343 | 2.13E-02 | 1.21E-02 | -1.83 | MYO1G        |
| A_23_P134426 | 8.86E-04 | 3.06E-04 | 3.08  | GPNMB        |
| A_23_P345575 | 3.03E-05 | 4.01E-06 | 1.97  | <b>FOXO3</b> |
| A_23_P94501  | 8.45E-05 | 1.68E-05 | 2.40  | ANXA1        |
| A_23_P206819 | 1.81E-04 | 4.37E-05 | -4.59 | HSD3B7       |
| A_23_P61371  | 3.40E-05 | 4.86E-06 | 1.70  | TMEM173      |
| A_23_P375494 | 4.78E-04 | 1.49E-04 | 2.63  | CEBPA        |
| A_24_P403244 | 9.64E-04 | 3.41E-04 | 4.52  | PILRB        |
| A_23_P45248  | 3.48E-02 | 2.12E-02 | -4.11 | SH2D1A       |
| A_24_P393151 | 2.73E-02 | 1.60E-02 | -3.63 | LILRA1       |
| A_23_P105957 | 1.21E-04 | 2.69E-05 | 2.13  | ACTN1        |
| A_23_P321703 | 1.71E-04 | 4.08E-05 | 1.57  | BCL2A1       |
| A_23_P85862  | 7.39E-03 | 3.61E-03 | 1.69  | GON4L        |
| A_23_P152181 | 5.09E-03 | 2.37E-03 | 1.72  | POLR3E       |
| A_24_P120934 | 2.66E-04 | 7.15E-05 | 2.09  | GADD45G      |
| A_24_P265506 | 1.35E-03 | 5.01E-04 | -2.27 | NTRK1        |
| A_23_P115460 | 1.01E-06 | 4.08E-09 | 1.75  | RPL22        |
| A_32_P9700   | 2.37E-06 | 3.82E-08 | 1.94  | PSMC1        |
| A_23_P171249 | 1.67E-06 | 1.69E-08 | 1.98  | IGBP1        |

|              |          |          |       |          |
|--------------|----------|----------|-------|----------|
| A_23_P17560  | 6.07E-03 | 2.90E-03 | 3.32  | KIF3B    |
| A_23_P104804 | 2.89E-05 | 3.75E-06 | 2.69  | ZBTB16   |
| A_24_P346277 | 7.30E-06 | 3.15E-07 | 1.93  | SRF      |
| A_23_P86884  | 7.93E-03 | 3.92E-03 | 2.34  | SART1    |
| A_32_P201496 | 2.30E-05 | 2.59E-06 | 1.98  | POLR3H   |
| A_24_P8892   | 4.59E-06 | 1.46E-07 | 1.75  | HDAC4    |
| A_23_P119562 | 1.15E-02 | 5.97E-03 | 2.46  | CFD      |
| A_23_P151610 | 1.26E-06 | 7.59E-09 | 2.42  | PSME1    |
| A_24_P153416 | 1.56E-03 | 5.99E-04 | -2.60 | KIR2DS1  |
| A_23_P47879  | 1.30E-05 | 1.03E-06 | 2.37  | STAT6    |
| A_23_P250251 | 2.34E-02 | 1.34E-02 | -2.97 | IFNA2    |
| A_24_P128205 | 2.10E-05 | 2.23E-06 | 2.00  | PSMD1    |
| A_24_P394420 | 3.28E-02 | 1.97E-02 | -5.10 | SFXN1    |
| A_23_P77971  | 3.71E-04 | 1.07E-04 | -3.51 | ITGA2B   |
| A_23_P348831 | 2.69E-03 | 1.14E-03 | -3.65 | IL3      |
| A_23_P155765 | 7.98E-06 | 3.93E-07 | 2.33  | HMGB2    |
| A_23_P142631 | 1.60E-06 | 1.33E-08 | 1.92  | FKBP1B   |
| A_23_P358944 | 3.60E-05 | 5.21E-06 | 1.69  | PML      |
| A_23_P256425 | 3.40E-02 | 2.06E-02 | -2.21 | ADAMDEC1 |
| A_24_P107695 | 1.96E-04 | 4.83E-05 | 2.66  | ACTN1    |
| A_24_P402222 | 2.90E-02 | 1.72E-02 | 2.53  | HLA-DRB3 |
| A_24_P639441 | 2.05E-04 | 5.10E-05 | 1.95  | CD59     |
| A_24_P24343  | 2.54E-04 | 6.73E-05 | -6.48 | SIPA1L3  |
| A_24_P269853 | 3.27E-02 | 1.97E-02 | 2.00  | ACTR1A   |
| A_24_P209772 | 5.99E-06 | 2.11E-07 | 2.45  | DCTN3    |
| A_24_P363679 | 1.99E-02 | 1.12E-02 | 2.51  | ATP6V1H  |
| A_24_P59667  | 2.22E-05 | 2.44E-06 | 1.66  | JAK3     |
| A_23_P127676 | 8.07E-06 | 4.01E-07 | 2.10  | CTR9     |
| A_23_P331598 | 1.50E-02 | 8.12E-03 | -1.63 | IPO7     |
| A_23_P407074 | 4.36E-03 | 1.98E-03 | 2.07  | DNM2     |
| A_23_P21853  | 1.06E-04 | 2.27E-05 | 2.10  | AP2A2    |
| A_23_P500271 | 1.10E-02 | 5.70E-03 | 1.66  | IRF5     |
| A_23_P73593  | 2.30E-02 | 1.32E-02 | 1.80  | MSN      |
| A_24_P262407 | 9.14E-04 | 3.19E-04 | 2.40  | THRA     |
| A_24_P113295 | 5.48E-06 | 1.83E-07 | 2.46  | AP2S1    |
| A_24_P139943 | 9.09E-04 | 3.17E-04 | 1.77  | HS1BP3   |
| A_23_P2920   | 2.12E-04 | 5.32E-05 | 11.17 | SERPINA3 |
| A_23_P39074  | 5.31E-05 | 9.03E-06 | 1.60  | RRAS     |
| A_23_P19590  | 3.53E-06 | 8.93E-08 | 2.55  | EZR      |
| A_24_P363711 | 2.43E-04 | 6.30E-05 | -4.49 | DEFA6    |
| A_23_P24031  | 3.47E-02 | 2.11E-02 | -2.81 | TLX1     |
| A_23_P206760 | 6.92E-04 | 2.30E-04 | 3.10  | HP       |
| A_24_P97104  | 1.44E-03 | 5.44E-04 | -2.55 | DPP4     |
| A_23_P158024 | 6.40E-06 | 2.48E-07 | 2.33  | DCTN3    |
| A_23_P75811  | 2.53E-04 | 6.68E-05 | 2.55  | SLC3A2   |
| A_23_P117494 | 1.01E-06 | 4.00E-09 | 2.16  | MTHFD1   |
| A_23_P128728 | 1.67E-03 | 6.51E-04 | 1.93  | ARG2     |
| A_23_P30848  | 4.12E-03 | 1.86E-03 | 3.04  | HLA-E    |
| A_23_P20704  | 1.94E-02 | 1.09E-02 | -2.78 | IFNA10   |
| A_24_P111342 | 1.26E-05 | 9.77E-07 | 1.49  | CASP9    |

|              |          |          |       |          |
|--------------|----------|----------|-------|----------|
| A_23_P171255 | 1.74E-04 | 4.18E-05 | 1.78  | IGBP1    |
| A_24_P367900 | 1.17E-04 | 2.59E-05 | -2.74 | ANGPT2   |
| A_23_P31006  | 3.40E-03 | 1.49E-03 | 3.01  | HLA-DRB5 |
| A_23_P257638 | 3.13E-06 | 6.38E-08 | 2.06  | CIB1     |
| A_24_P353794 | 4.32E-04 | 1.31E-04 | 2.05  | GALNT2   |
| A_23_P258769 | 1.76E-04 | 4.24E-05 | 2.63  | HLA-DPB1 |
| A_23_P128744 | 2.73E-02 | 1.60E-02 | -2.15 | BDKRB1   |
| A_23_P87545  | 2.77E-05 | 3.49E-06 | 2.59  | IFITM3   |
| A_24_P12397  | 3.94E-02 | 2.45E-02 | 2.20  | TREM2    |
| A_23_P33752  | 7.09E-06 | 2.98E-07 | 2.12  | SLC25A6  |
| A_24_P278367 | 3.18E-06 | 6.65E-08 | 3.15  | ACTR1A   |
| A_24_P366652 | 2.15E-05 | 2.31E-06 | -4.91 | ITGAD    |
| A_23_P119526 | 2.70E-02 | 1.58E-02 | 2.39  | AP3D1    |
| A_23_P7144   | 5.04E-04 | 1.59E-04 | 2.02  | CXCL1    |
| A_23_P70670  | 4.59E-06 | 1.48E-07 | 2.26  | CD83     |
| A_24_P221414 | 2.66E-05 | 3.30E-06 | 2.27  | DYNC1I1  |
| A_23_P4662   | 5.75E-03 | 2.73E-03 | 1.71  | BCL3     |
| A_24_P682285 | 6.08E-05 | 1.08E-05 | 3.53  | HSPA1A   |
| A_32_P137035 | 1.91E-03 | 7.63E-04 | 1.66  | TRIM27   |
| A_23_P203332 | 8.21E-06 | 4.22E-07 | 1.59  | FAM111A  |
| A_24_P226554 | 3.53E-06 | 8.86E-08 | 2.64  | ACTB     |
| A_32_P356316 | 1.12E-04 | 2.44E-05 | 1.75  | HLA-DOA  |
| A_32_P29759  | 1.26E-06 | 9.57E-09 | 2.60  | IK       |
| A_23_P433865 | 2.07E-03 | 8.33E-04 | -4.47 | C2       |
| A_23_P54540  | 8.16E-03 | 4.04E-03 | 1.89  | EIF2AK4  |
| A_23_P12282  | 1.00E-03 | 3.58E-04 | 1.70  | DYRK3    |
| A_23_P73589  | 3.53E-06 | 8.63E-08 | 2.35  | MSN      |
| A_24_P165965 | 4.24E-04 | 1.27E-04 | 1.51  | TUSC2    |
| A_23_P119130 | 6.00E-06 | 2.16E-07 | 2.20  | RPS19    |
| A_32_P173481 | 3.40E-06 | 7.96E-08 | 1.95  | IK       |
| A_23_P207600 | 6.10E-06 | 2.30E-07 | 2.17  | PSMD11   |
| A_23_P104607 | 2.48E-03 | 1.03E-03 | 3.07  | PSMC3    |
| A_23_P127088 | 4.04E-05 | 6.15E-06 | 2.20  | CUEDC2   |
| A_23_P211985 | 8.64E-03 | 4.33E-03 | 1.87  | SNRK     |
| A_24_P82200  | 1.24E-02 | 6.50E-03 | 1.59  | MEIS2    |
| A_23_P137035 | 3.22E-05 | 4.41E-06 | 1.89  | PIR      |
| A_24_P472055 | 4.59E-03 | 2.11E-03 | -2.14 | RNF125   |
| A_24_P943792 | 4.78E-04 | 1.49E-04 | 2.11  | CD47     |
| A_23_P259621 | 1.41E-03 | 5.31E-04 | 1.83  | LAT2     |
| A_24_P370472 | 1.53E-02 | 8.35E-03 | 2.68  | HLA-DRB4 |
| A_23_P166371 | 8.92E-03 | 4.48E-03 | -1.99 | VPREB3   |
| A_23_P306507 | 2.68E-02 | 1.57E-02 | 1.84  | KRAS     |
| A_23_P138194 | 6.66E-04 | 2.20E-04 | 2.04  | NCF2     |
| A_23_P71624  | 1.97E-02 | 1.11E-02 | -2.18 | PAX5     |
| A_23_P130040 | 7.08E-05 | 1.32E-05 | 1.88  | PHB      |
| A_23_P383377 | 2.24E-05 | 2.48E-06 | -4.02 | KLF1     |
| A_23_P22096  | 1.34E-06 | 1.08E-08 | 2.16  | PTK2     |
| A_23_P348636 | 1.25E-02 | 6.55E-03 | 1.91  | FOXJ1    |
| A_23_P214627 | 8.72E-04 | 3.00E-04 | 2.23  | AIF1     |
| A_23_P125107 | 8.89E-06 | 5.35E-07 | 3.32  | HLA-B    |

|              |          |          |       |             |
|--------------|----------|----------|-------|-------------|
| A_24_P388528 | 1.02E-04 | 2.15E-05 | 1.85  | ST6GAL1     |
| A_23_P381979 | 9.50E-05 | 1.98E-05 | 2.00  | OGT         |
| A_23_P37497  | 1.96E-04 | 4.81E-05 | 1.77  | MYO1E       |
| A_32_P156963 | 9.21E-06 | 5.73E-07 | 2.33  | ACTG1       |
| A_23_P217688 | 1.81E-05 | 1.80E-06 | 1.81  | TSC22D3     |
| A_23_P38959  | 8.64E-03 | 4.33E-03 | 1.66  | VAV1        |
| A_23_P48088  | 3.02E-04 | 8.42E-05 | -1.64 | CD27        |
| A_24_P74753  | 2.23E-03 | 9.11E-04 | 2.40  | ATP6AP1     |
| A_24_P244356 | 9.26E-06 | 5.92E-07 | 1.81  | NLRX1       |
| A_23_P500676 | 2.10E-02 | 1.20E-02 | -3.03 | IL5RA       |
| A_24_P88696  | 8.27E-03 | 4.10E-03 | 2.85  | <b>SCG2</b> |
| A_24_P86993  | 1.74E-04 | 4.19E-05 | 2.19  | JAM3        |
| A_23_P133245 | 7.74E-06 | 3.70E-07 | 1.99  | IK          |
| A_24_P166443 | 1.49E-05 | 1.30E-06 | 2.99  | HLA-DPB1    |
| A_23_P361773 | 2.65E-02 | 1.54E-02 | 1.69  | CCND3       |
| A_32_P234459 | 2.53E-04 | 6.70E-05 | 4.30  | HLA-H       |
| A_24_P113674 | 7.30E-06 | 3.24E-07 | 2.57  | HLA-B       |
| A_24_P373174 | 3.68E-02 | 2.27E-02 | -2.58 | RAB27A      |
| A_24_P226108 | 2.11E-04 | 5.30E-05 | -6.01 | RBM47       |
| A_23_P39465  | 1.12E-04 | 2.43E-05 | 2.00  | BST2        |
| A_23_P200767 | 3.41E-04 | 9.71E-05 | 1.68  | TROVE2      |
| A_24_P224727 | 8.89E-05 | 1.81E-05 | 2.14  | CEBPA       |
| A_23_P63798  | 5.98E-06 | 2.09E-07 | 2.30  | KLF6        |
| A_24_P216165 | 2.09E-04 | 5.23E-05 | -2.49 | CEBPA       |
| A_23_P111662 | 2.10E-05 | 2.23E-06 | -5.16 | ABCB5       |
| A_24_P166042 | 3.79E-04 | 1.10E-04 | 1.99  | IMPDH2      |
| A_32_P186921 | 3.29E-05 | 4.59E-06 | -1.42 | ZNF616      |
| A_23_P64525  | 7.95E-05 | 1.54E-05 | -4.00 | RAG2        |
| A_23_P337242 | 1.26E-06 | 8.32E-09 | -1.75 | TGFBR2      |
| A_24_P94916  | 1.78E-02 | 9.88E-03 | 1.88  | LST1        |
| A_23_P32404  | 1.79E-06 | 1.93E-08 | 1.87  | ISG20       |
| A_23_P31323  | 2.70E-06 | 4.61E-08 | 2.60  | ACTB        |
| A_24_P141688 | 1.10E-04 | 2.38E-05 | 1.59  | PCBP2       |
| A_23_P413641 | 6.00E-06 | 2.20E-07 | 1.78  | PREX1       |
| A_23_P163347 | 3.98E-04 | 1.17E-04 | 1.57  | PIAS1       |
| A_23_P390518 | 4.20E-04 | 1.26E-04 | -2.06 | TNFRSF11A   |
| A_23_P312132 | 4.63E-02 | 2.94E-02 | 1.77  | ITGAX       |
| A_23_P158239 | 2.34E-02 | 1.35E-02 | 1.75  | SHMT2       |
| A_23_P112798 | 3.05E-03 | 1.31E-03 | 2.41  | CRIP2       |
| A_23_P501538 | 7.30E-06 | 3.22E-07 | -2.04 | HOXA3       |
| A_23_P146644 | 5.59E-05 | 9.67E-06 | 3.00  | ANXA2       |
| A_23_P28279  | 2.25E-04 | 5.75E-05 | 2.26  | ACTR1B      |
| A_23_P368805 | 1.22E-05 | 9.06E-07 | -1.79 | HHLA2       |
| A_32_P9543   | 1.21E-02 | 6.30E-03 | -1.75 | APOBEC3A    |

In bold are highlighted candidate genes already known to contribute to ALS susceptibility.

\*Gene expression fold-changes are given on a linear scale.

**Supplementary Table 4. Neuroinflammatory genes differentially expressed in SALS2.**

| Probe ID     | p Value (Corr) | p Value  | Fold Change<br>(SALS2/CTRL <sup>+</sup> )* | GENE_SYMBOL   |
|--------------|----------------|----------|--------------------------------------------|---------------|
| A_23_P126540 | 3.37E-03       | 1.47E-03 | 2.20                                       | ADORA3        |
| A_23_P82886  | 6.84E-03       | 3.33E-03 | 1.58                                       | DEFA6         |
| A_23_P426292 | 1.03E-04       | 2.20E-05 | -1.82                                      | <b>MAPK14</b> |
| A_23_P48936  | 2.22E-05       | 2.44E-06 | -1.70                                      | SMAD3         |
| A_23_P119478 | 3.66E-05       | 5.33E-06 | -1.68                                      | EBI3          |
| A_24_P202522 | 1.56E-05       | 1.41E-06 | -2.78                                      | AQP4          |
| A_23_P169629 | 3.49E-05       | 5.00E-06 | -2.04                                      | SHMT2         |
| A_24_P129277 | 3.04E-03       | 1.30E-03 | 1.94                                       | NOD1          |
| A_23_P87973  | 1.53E-05       | 1.38E-06 | -3.79                                      | TRIM13        |
| A_23_P7325   | 2.23E-05       | 2.45E-06 | 2.03                                       | BST1          |
| A_24_P295999 | 1.49E-04       | 3.45E-05 | -3.87                                      | CD4           |
| A_32_P186474 | 2.55E-03       | 1.07E-03 | -2.46                                      | RACGAP1       |
| A_24_P337700 | 1.10E-02       | 5.64E-03 | -2.45                                      | VNN1          |
| A_32_P154830 | 8.21E-06       | 4.24E-07 | -1.69                                      | OSTM1         |
| A_23_P89249  | 7.67E-04       | 2.59E-04 | 1.62                                       | ERBB2         |
| A_24_P139191 | 2.31E-05       | 2.62E-06 | -3.19                                      | ITCH          |
| A_23_P54373  | 7.35E-05       | 1.39E-05 | -2.96                                      | RAB27A        |
| A_24_P83615  | 4.47E-03       | 2.04E-03 | -2.73                                      | NLRP1         |
| A_23_P308603 | 3.22E-05       | 4.41E-06 | -4.30                                      | SRC           |
| A_23_P309739 | 2.75E-02       | 1.61E-02 | -1.56                                      | ESR1          |
| A_24_P308096 | 1.63E-04       | 3.86E-05 | -2.76                                      | JAK3          |
| A_23_P138760 | 2.44E-03       | 1.01E-03 | 1.57                                       | CLCF1         |
| A_23_P2990   | 3.94E-03       | 1.76E-03 | 3.17                                       | CEBPE         |
| A_32_P61757  | 2.49E-05       | 3.00E-06 | -4.24                                      | PTPN11        |
| A_32_P530933 | 1.08E-02       | 5.53E-03 | -3.37                                      | PYGO1         |
| A_23_P35456  | 1.11E-04       | 2.41E-05 | -3.13                                      | SH3PXD2A      |
| A_23_P31945  | 1.42E-05       | 1.18E-06 | -3.07                                      | IL33          |
| A_23_P84705  | 1.27E-05       | 9.92E-07 | 9.01                                       | TNFRSF13B     |
| A_23_P68740  | 1.71E-03       | 6.72E-04 | -1.75                                      | AIRE          |
| A_23_P68155  | 7.93E-04       | 2.70E-04 | -1.60                                      | IFIH1         |
| A_23_P208706 | 8.45E-05       | 1.68E-05 | -2.51                                      | <b>BAX</b>    |
| A_23_P99985  | 2.04E-06       | 2.85E-08 | -2.28                                      | HMGB1         |
| A_23_P35916  | 7.95E-05       | 1.55E-05 | 3.99                                       | ATM           |
| A_23_P135248 | 5.08E-04       | 1.61E-04 | 1.81                                       | CCL27         |
| A_23_P168836 | 7.40E-03       | 3.62E-03 | 2.30                                       | PTK2B         |
| A_23_P70688  | 6.08E-05       | 1.08E-05 | -2.66                                      | LY86          |
| A_23_P167096 | 2.18E-04       | 5.51E-05 | -2.00                                      | VEGFC         |
| A_24_P354800 | 2.43E-05       | 2.84E-06 | -3.57                                      | HLA-DOA       |
| A_23_P343799 | 4.00E-04       | 1.18E-04 | 3.56                                       | SOX6          |
| A_23_P29885  | 2.56E-05       | 3.12E-06 | -2.63                                      | MAEA          |
| A_23_P23303  | 6.68E-07       | 5.52E-10 | 4.12                                       | EXO1          |
| A_24_P134074 | 5.90E-05       | 1.03E-05 | -2.88                                      | RPS19         |
| A_23_P1691   | 4.39E-06       | 1.36E-07 | 2.79                                       | MMP1          |
| A_23_P50907  | 1.61E-04       | 3.80E-05 | -2.37                                      | ITGAV         |
| A_24_P142118 | 2.99E-03       | 1.28E-03 | -1.81                                      | THBS1         |
| A_23_P70095  | 1.39E-02       | 7.41E-03 | 2.10                                       | CD74          |
| A_23_P101992 | 3.31E-02       | 1.99E-02 | 2.98                                       | MARCO         |

|              |          |          |       |              |
|--------------|----------|----------|-------|--------------|
| A_23_P40174  | 4.13E-05 | 6.31E-06 | -3.17 | <b>MMP9</b>  |
| A_23_P134454 | 8.55E-05 | 1.72E-05 | -2.65 | CAV1         |
| A_23_P29939  | 1.94E-05 | 1.98E-06 | -3.64 | SNCA         |
| A_23_P94879  | 6.68E-07 | 1.99E-10 | 3.82  | F2           |
| A_24_P151464 | 1.60E-05 | 1.48E-06 | -4.52 | <b>SOD1</b>  |
| A_23_P62953  | 1.25E-02 | 6.59E-03 | 5.61  | PBX1         |
| A_23_P162874 | 1.59E-03 | 6.16E-04 | -3.86 | HSP90AA1     |
| A_23_P70020  | 8.53E-06 | 4.75E-07 | -2.80 | PFDN1        |
| A_24_P898583 | 1.64E-05 | 1.54E-06 | -1.89 | TRIM26       |
| A_23_P376096 | 1.67E-02 | 9.20E-03 | -1.70 | TICAM1       |
| A_23_P115792 | 9.20E-04 | 3.21E-04 | -2.47 | PLEKHA1      |
| A_23_P205686 | 6.64E-06 | 2.63E-07 | -2.28 | <b>PSEN1</b> |
| A_23_P203191 | 5.23E-05 | 8.83E-06 | 1.81  | APOA1        |
| A_24_P343695 | 3.89E-06 | 1.13E-07 | 2.19  | RET          |
| A_23_P107073 | 1.49E-05 | 1.31E-06 | -2.42 | RPA1         |
| A_23_P212617 | 4.58E-05 | 7.29E-06 | -2.04 | TFRC         |
| A_24_P227927 | 4.51E-04 | 1.39E-04 | 2.05  | IL21R        |
| A_32_P181077 | 1.56E-04 | 3.65E-05 | -2.32 | DOCK8        |
| A_23_P63668  | 7.62E-06 | 3.58E-07 | -1.75 | IFIT5        |
| A_23_P140967 | 1.20E-03 | 4.40E-04 | -3.13 | MEFV         |
| A_23_P111571 | 7.97E-05 | 1.55E-05 | -7.00 | HOXA3        |
| A_24_P92683  | 2.91E-03 | 1.24E-03 | -1.91 | IGHA1        |
| A_23_P213706 | 1.96E-06 | 2.39E-08 | 6.64  | IL4          |
| A_23_P207596 | 6.84E-04 | 2.27E-04 | -3.35 | NF1          |
| A_23_P106024 | 4.36E-05 | 6.82E-06 | -1.53 | JAG2         |
| A_23_P43049  | 1.18E-05 | 8.55E-07 | -3.65 | DCTN6        |
| A_32_P115015 | 6.84E-05 | 1.26E-05 | -2.23 | CDC42        |
| A_23_P7313   | 3.02E-04 | 8.43E-05 | -2.80 | SPP1         |
| A_23_P6272   | 9.09E-05 | 1.87E-05 | -2.15 | ICOSLG       |
| A_23_P103361 | 1.17E-02 | 6.08E-03 | -1.66 | LCK          |
| A_24_P184535 | 8.52E-05 | 1.70E-05 | -1.91 | C12orf4      |
| A_23_P117546 | 1.02E-02 | 5.22E-03 | -1.66 | SOS2         |
| A_24_P943283 | 1.43E-03 | 5.37E-04 | -2.34 | DENND1B      |
| A_24_P274270 | 1.26E-06 | 9.85E-09 | -2.00 | STAT1        |
| A_23_P77847  | 8.52E-05 | 1.71E-05 | -2.87 | GRB2         |
| A_23_P72096  | 3.33E-05 | 4.70E-06 | 2.08  | IL1A         |
| A_24_P291016 | 1.88E-03 | 7.48E-04 | 1.80  | ABL1         |
| A_32_P151102 | 3.39E-05 | 4.83E-06 | 2.10  | MSN          |
| A_23_P83277  | 1.02E-04 | 2.15E-05 | -1.81 | IL11RA       |
| A_24_P158089 | 2.45E-05 | 2.89E-06 | -2.46 | SERPINE1     |
| A_24_P93948  | 1.26E-05 | 9.74E-07 | -2.71 | KIF5A        |
| A_24_P916496 | 3.48E-04 | 9.97E-05 | -3.11 | <b>PRKCA</b> |
| A_24_P100742 | 1.22E-04 | 2.73E-05 | 2.80  | ADD1         |
| A_24_P929754 | 5.12E-03 | 2.38E-03 | -2.10 | MKNK2        |
| A_24_P852756 | 9.26E-04 | 3.24E-04 | -3.29 | HLA-DQA2     |
| A_23_P215406 | 8.71E-06 | 5.05E-07 | -3.88 | RAC1         |
| A_24_P260443 | 7.44E-06 | 3.38E-07 | -2.49 | THBS4        |
| A_23_P57036  | 1.28E-03 | 4.73E-04 | 1.43  | CD40         |
| A_23_P10291  | 1.24E-04 | 2.78E-05 | -1.91 | CTSE         |
| A_23_P153616 | 6.60E-05 | 1.20E-05 | -2.36 | MADCAM1      |

|              |          |          |       |               |
|--------------|----------|----------|-------|---------------|
| A_23_P394605 | 2.48E-02 | 1.44E-02 | -1.72 | SEC24A        |
| A_24_P295010 | 4.04E-05 | 6.13E-06 | -4.85 | SERPINB9      |
| A_32_P214943 | 9.76E-03 | 4.96E-03 | 2.27  | PCBP2         |
| A_23_P209712 | 4.49E-03 | 2.05E-03 | -2.03 | SP100         |
| A_23_P171324 | 3.30E-05 | 4.61E-06 | 2.86  | L1CAM         |
| A_23_P373028 | 1.80E-03 | 7.10E-04 | -1.82 | CACNA1C       |
| A_24_P56388  | 9.09E-05 | 1.87E-05 | -2.34 | HIF1A         |
| A_23_P502312 | 2.15E-04 | 5.43E-05 | -2.23 | CD97          |
| A_23_P37535  | 1.25E-04 | 2.81E-05 | -3.39 | RAB8B         |
| A_24_P278008 | 5.30E-05 | 9.00E-06 | -2.41 | DCTN6         |
| A_24_P932233 | 3.15E-04 | 8.86E-05 | -2.39 | TET2          |
| A_23_P71037  | 4.07E-04 | 1.20E-04 | -2.21 | IL6           |
| A_23_P126735 | 2.54E-04 | 6.71E-05 | -2.48 | IL10          |
| A_23_P69491  | 3.53E-06 | 9.01E-08 | -3.34 | RHOA          |
| A_23_P253524 | 1.01E-04 | 2.12E-05 | -2.37 | CENPE         |
| A_23_P170273 | 2.90E-04 | 8.00E-05 | -1.83 | SEC31A        |
| A_24_P254079 | 6.81E-03 | 3.31E-03 | 2.96  | ICAM5         |
| A_24_P209765 | 3.53E-06 | 8.95E-08 | -2.83 | DCTN3         |
| A_23_P143242 | 1.46E-03 | 5.55E-04 | -1.58 | CEBPB         |
| A_23_P257895 | 1.28E-02 | 6.78E-03 | 1.88  | MAPK1         |
| A_23_P58293  | 1.01E-06 | 4.34E-09 | -3.49 | UBE2D3        |
| A_24_P246196 | 3.40E-03 | 1.48E-03 | 2.18  | CLEC4M        |
| A_24_P156769 | 2.87E-05 | 3.69E-06 | -5.63 | MPL           |
| A_23_P154306 | 1.96E-06 | 2.36E-08 | -3.67 | TANK          |
| A_23_P254091 | 3.28E-06 | 7.28E-08 | -2.14 | KIF2A         |
| A_23_P167537 | 3.41E-04 | 9.71E-05 | -2.79 | CPLX2         |
| A_23_P48570  | 5.59E-03 | 2.64E-03 | -1.73 | DHRS2         |
| A_23_P85250  | 7.92E-03 | 3.90E-03 | -1.53 | CD24          |
| A_23_P81912  | 5.03E-06 | 1.64E-07 | -2.15 | TUBB          |
| A_23_P24433  | 2.86E-04 | 7.89E-05 | -2.85 | CTSF          |
| A_23_P151294 | 1.01E-06 | 3.77E-09 | 1.94  | IFNG          |
| A_23_P26810  | 6.00E-06 | 2.20E-07 | 1.90  | <b>TP53</b>   |
| A_23_P79628  | 3.14E-05 | 4.22E-06 | -4.02 | PSME4         |
| A_23_P2960   | 7.30E-06 | 3.17E-07 | 1.92  | <b>AKT1</b>   |
| A_23_P209269 | 2.30E-05 | 2.58E-06 | -3.15 | PPM1B         |
| A_32_P223777 | 8.83E-06 | 5.17E-07 | -2.09 | IL6ST         |
| A_23_P89410  | 6.77E-05 | 1.24E-05 | -2.07 | BECN1         |
| A_23_P62920  | 1.26E-05 | 9.68E-07 | -3.34 | <b>KIFAP3</b> |
| A_23_P121064 | 4.78E-04 | 1.49E-04 | -2.12 | PTX3          |
| A_23_P300033 | 2.78E-04 | 7.56E-05 | -1.67 | PDGFRA        |
| A_23_P372255 | 5.34E-05 | 9.14E-06 | -2.62 | ITPKB         |
| A_23_P144054 | 3.14E-05 | 4.21E-06 | -2.88 | PRKCD         |
| A_23_P36397  | 1.67E-05 | 1.60E-06 | -2.63 | CYP27B1       |
| A_23_P99540  | 3.48E-04 | 9.96E-05 | -2.52 | ZFP36L1       |
| A_23_P55281  | 1.63E-03 | 6.30E-04 | 3.92  | HOXB7         |
| A_23_P106682 | 1.07E-04 | 2.31E-05 | -2.08 | EMP2          |
| A_23_P149545 | 7.60E-03 | 3.74E-03 | -2.10 | HIST2H2BE     |
| A_23_P91619  | 6.02E-05 | 1.06E-05 | -3.98 | MIF           |
| A_23_P250462 | 2.67E-05 | 3.34E-06 | -2.77 | ATP6AP1       |
| A_23_P52278  | 1.79E-05 | 1.77E-06 | 3.80  | KIF11         |

|              |          |          |       |             |
|--------------|----------|----------|-------|-------------|
| A_23_P72050  | 2.22E-06 | 3.47E-08 | -2.20 | PTK2        |
| A_23_P30736  | 3.76E-03 | 1.67E-03 | -2.77 | HLA-DOB     |
| A_23_P252062 | 1.82E-03 | 7.19E-04 | 2.02  | PPARG       |
| A_24_P167473 | 1.98E-05 | 2.04E-06 | -2.06 | ARPC3       |
| A_23_P12113  | 1.68E-03 | 6.56E-04 | 5.01  | FLVCR1      |
| A_23_P348894 | 2.61E-04 | 6.98E-05 | -2.18 | SEC23A      |
| A_23_P407718 | 3.63E-02 | 2.23E-02 | -1.62 | TRIM59      |
| A_23_P87216  | 3.30E-05 | 4.61E-06 | -2.95 | SLC3A2      |
| A_23_P20970  | 3.18E-06 | 6.67E-08 | -2.10 | ATG12       |
| A_23_P104689 | 1.46E-05 | 1.26E-06 | -3.54 | RELA        |
| A_23_P77228  | 4.22E-05 | 6.47E-06 | -1.54 | CRTC3       |
| A_23_P54206  | 3.06E-04 | 8.58E-05 | 3.21  | TSHR        |
| A_24_P38702  | 1.73E-02 | 9.54E-03 | -2.12 | NKX2-3      |
| A_23_P10873  | 2.52E-04 | 6.62E-05 | -3.24 | TLR1        |
| A_23_P210210 | 4.24E-04 | 1.28E-04 | -2.62 | EPAS1       |
| A_23_P127438 | 3.03E-05 | 4.01E-06 | -2.95 | FAU         |
| A_23_P81492  | 9.66E-06 | 6.26E-07 | -2.78 | RPS14       |
| A_24_P337746 | 5.21E-05 | 8.77E-06 | -1.69 | RABGEF1     |
| A_23_P216756 | 1.16E-03 | 4.23E-04 | 3.22  | FCN2        |
| A_23_P44768  | 3.95E-05 | 5.90E-06 | -2.30 | <b>TBK1</b> |
| A_23_P67466  | 1.04E-05 | 7.07E-07 | -2.49 | PSMD8       |
| A_23_P95960  | 6.31E-05 | 1.14E-05 | -1.97 | POLR3D      |
| A_23_P218770 | 1.56E-03 | 6.02E-04 | -1.59 | RAC2        |
| A_23_P123343 | 8.34E-04 | 2.85E-04 | -1.55 | NUDCD1      |
| A_24_P412976 | 2.79E-05 | 3.52E-06 | -4.16 | TMEM143     |
| A_23_P140916 | 4.24E-06 | 1.30E-07 | -2.04 | GLG1        |
| A_23_P103522 | 2.81E-03 | 1.20E-03 | 4.96  | <b>SELL</b> |
| A_23_P377750 | 4.10E-04 | 1.22E-04 | 4.17  | FGF10       |
| A_23_P396135 | 8.80E-03 | 4.42E-03 | -2.07 | NKX2-5      |
| A_23_P305677 | 6.90E-06 | 2.80E-07 | -1.98 | UBE2D2      |
| A_24_P76809  | 3.73E-03 | 1.66E-03 | -1.76 | PTPRO       |
| A_23_P9255   | 3.62E-05 | 5.27E-06 | -2.60 | SYK         |
| A_24_P388322 | 8.97E-03 | 4.51E-03 | 2.13  | COLEC11     |
| A_24_P71973  | 1.45E-04 | 3.32E-05 | -2.12 | <b>KDR</b>  |
| A_23_P311616 | 1.72E-03 | 6.76E-04 | 2.35  | JMJD6       |
| A_23_P29994  | 8.12E-06 | 4.08E-07 | -2.15 | RBPJ        |
| A_23_P112602 | 1.52E-05 | 1.37E-06 | -1.91 | TRIM62      |
| A_23_P51231  | 1.81E-03 | 7.18E-04 | 4.30  | RUNX3       |
| A_23_P140301 | 2.22E-05 | 2.44E-06 | -2.48 | PSMA3       |
| A_23_P139820 | 8.42E-05 | 1.67E-05 | -2.86 | SLC11A2     |
| A_23_P162486 | 4.25E-05 | 6.56E-06 | 1.78  | PTPN6       |
| A_23_P206212 | 7.90E-07 | 1.70E-09 | 3.12  | THBS1       |
| A_23_P40470  | 3.70E-03 | 1.64E-03 | 4.23  | HIST1H2BE   |
| A_23_P369815 | 2.61E-04 | 7.02E-05 | 2.20  | FASLG       |
| A_24_P133253 | 3.11E-03 | 1.34E-03 | -1.79 | KITLG       |
| A_23_P167250 | 1.46E-03 | 5.53E-04 | 2.30  | IL21        |
| A_23_P417891 | 1.33E-04 | 3.00E-05 | -3.35 | ARHGEF7     |
| A_24_P365767 | 7.27E-05 | 1.38E-05 | -2.94 | CYBB        |
| A_23_P329593 | 3.98E-03 | 1.79E-03 | -2.00 | SEC24A      |
| A_23_P34788  | 9.14E-04 | 3.19E-04 | -2.08 | KIF2C       |

|              |          |          |       |              |
|--------------|----------|----------|-------|--------------|
| A_24_P918175 | 1.84E-04 | 4.45E-05 | 3.11  | TBK1         |
| A_24_P263793 | 1.93E-04 | 4.73E-05 | 1.59  | FCN1         |
| A_23_P99883  | 1.20E-04 | 2.65E-05 | -3.04 | PDIA3        |
| A_23_P17837  | 3.40E-05 | 4.87E-06 | 5.45  | APOL1        |
| A_23_P42935  | 1.37E-02 | 7.30E-03 | -1.45 | BRAF         |
| A_24_P934487 | 5.64E-03 | 2.67E-03 | 5.00  | STXBP2       |
| A_24_P305597 | 3.35E-05 | 4.77E-06 | -1.72 | ADRM1        |
| A_23_P206177 | 1.97E-04 | 4.86E-05 | -2.50 | SNAP23       |
| A_32_P120977 | 8.16E-06 | 4.15E-07 | -1.68 | PRELID1      |
| A_24_P200023 | 2.83E-04 | 7.78E-05 | -1.94 | IL1R1        |
| A_32_P4364   | 3.35E-05 | 4.75E-06 | -3.10 | BCAP31       |
| A_23_P500244 | 4.00E-05 | 6.04E-06 | -1.95 | TRPV1        |
| A_23_P502142 | 1.33E-05 | 1.07E-06 | -2.28 | FYN          |
| A_23_P423457 | 7.78E-04 | 2.63E-04 | -2.23 | SERINC5      |
| A_23_P5778   | 1.61E-03 | 6.23E-04 | 3.64  | RAB17        |
| A_23_P340728 | 6.72E-06 | 2.67E-07 | -2.10 | <b>PSEN1</b> |
| A_23_P204689 | 1.66E-05 | 1.59E-06 | -2.35 | CLEC2D       |
| A_23_P387552 | 5.35E-04 | 1.70E-04 | -2.65 | RARG         |
| A_24_P237265 | 4.78E-05 | 7.85E-06 | -1.87 | MAPK1        |
| A_24_P418418 | 8.02E-05 | 1.56E-05 | -2.92 | RPS17        |
| A_24_P236437 | 2.48E-05 | 2.96E-06 | -3.36 | DYNC1LI2     |
| A_23_P26965  | 1.19E-04 | 2.62E-05 | 3.21  | CCL13        |
| A_23_P108785 | 1.44E-05 | 1.24E-06 | -2.62 | ACTR3        |
| A_24_P917783 | 3.25E-02 | 1.96E-02 | -2.01 | RUNX1        |
| A_32_P89837  | 1.07E-04 | 2.31E-05 | -2.16 | TRAF3        |
| A_24_P933151 | 2.32E-06 | 3.68E-08 | 2.67  | HOXB6        |
| A_23_P101783 | 2.99E-03 | 1.28E-03 | -1.96 | IL12RB1      |
| A_23_P218456 | 9.04E-06 | 5.52E-07 | -2.93 | ILF3         |
| A_24_P927507 | 2.74E-03 | 1.17E-03 | -2.35 | OSBPL1A      |
| A_23_P250564 | 8.40E-06 | 4.47E-07 | -2.71 | PRKCE        |
| A_23_P301138 | 5.09E-05 | 8.46E-06 | -3.96 | IP6K2        |
| A_23_P121253 | 1.57E-02 | 8.57E-03 | -1.53 | TNFSF10      |
| A_32_P162187 | 2.25E-04 | 5.71E-05 | -2.70 | C2           |
| A_23_P204208 | 2.33E-05 | 2.66E-06 | 5.05  | KLRD1        |
| A_23_P81805  | 1.95E-03 | 7.80E-04 | -1.79 | <b>VEGFA</b> |
| A_24_P400729 | 1.81E-04 | 4.37E-05 | -1.85 | PPP4R2       |
| A_23_P13899  | 1.58E-05 | 1.45E-06 | -3.20 | GAPDH        |
| A_23_P165968 | 1.40E-02 | 7.53E-03 | 4.31  | SEMG1        |
| A_23_P142455 | 1.24E-05 | 9.44E-07 | -2.63 | SIRT2        |
| A_23_P256375 | 7.09E-06 | 2.97E-07 | -2.13 | STX4         |
| A_23_P372910 | 2.34E-03 | 9.65E-04 | -2.92 | RORC         |
| A_23_P404965 | 1.63E-05 | 1.52E-06 | -3.92 | GNL1         |
| A_24_P145377 | 1.32E-04 | 2.97E-05 | -5.35 | HSP90AA1     |
| A_23_P152655 | 9.26E-06 | 5.90E-07 | -1.92 | ICAM2        |
| A_23_P134764 | 1.06E-02 | 5.43E-03 | 1.68  | LY6D         |
| A_23_P218442 | 2.06E-05 | 2.18E-06 | -4.19 | CEACAM6      |
| A_23_P22671  | 1.26E-06 | 8.49E-09 | -2.48 | VAMP7        |
| A_24_P401990 | 1.77E-03 | 6.96E-04 | -2.31 | ERCC2        |
| A_23_P4885   | 1.65E-04 | 3.92E-05 | 1.54  | AP2A1        |
| A_23_P207981 | 6.84E-03 | 3.33E-03 | 4.34  | SOCS6        |

|              |          |          |       |              |
|--------------|----------|----------|-------|--------------|
| A_23_P347198 | 1.86E-03 | 7.38E-04 | -1.89 | SP3          |
| A_23_P168928 | 5.75E-04 | 1.85E-04 | -2.10 | CYP11B1      |
| A_24_P322756 | 1.04E-02 | 5.33E-03 | 3.58  | <b>TRPM2</b> |
| A_23_P258340 | 1.24E-05 | 9.43E-07 | -4.60 | PPIA         |
| A_23_P75056  | 1.14E-05 | 8.08E-07 | 2.66  | GATA3        |
| A_23_P212844 | 2.68E-03 | 1.13E-03 | 5.93  | TACC3        |
| A_23_P253317 | 2.67E-04 | 7.20E-05 | -1.96 | GPR171       |
| A_23_P4286   | 6.12E-04 | 1.98E-04 | -2.26 | XAF1         |
| A_23_P30024  | 6.58E-06 | 2.57E-07 | -2.71 | NFKB1        |
| A_23_P34888  | 1.47E-04 | 3.40E-05 | -2.28 | CHIA         |
| A_32_P226149 | 5.89E-06 | 2.04E-07 | -2.75 | YWHAZ        |
| A_24_P178011 | 3.18E-05 | 4.30E-06 | -4.31 | MYC          |
| A_24_P930276 | 1.67E-03 | 6.51E-04 | -3.34 | NFE2L1       |
| A_23_P315651 | 1.70E-04 | 4.07E-05 | -4.77 | CYBA         |
| A_23_P26890  | 1.44E-03 | 5.44E-04 | -2.50 | MMP28        |
| A_23_P126716 | 1.05E-04 | 2.25E-05 | -4.90 | ATPIF1       |
| A_23_P11739  | 4.78E-05 | 7.84E-06 | 1.95  | MIXL1        |
| A_23_P133432 | 3.28E-06 | 7.31E-08 | -4.35 | SKP1         |
| A_24_P8371   | 3.20E-05 | 4.33E-06 | -2.68 | SPNS2        |
| A_23_P251945 | 2.15E-05 | 2.30E-06 | -2.25 | DCTN4        |
| A_23_P79836  | 3.21E-06 | 6.91E-08 | -3.32 | SERINC3      |
| A_24_P933908 | 3.91E-03 | 1.75E-03 | 2.95  | GPNMB        |
| A_23_P500282 | 4.45E-04 | 1.36E-04 | -1.94 | PACS1        |
| A_23_P19543  | 2.43E-05 | 2.85E-06 | -2.63 | SRPK1        |
| A_23_P136347 | 2.57E-03 | 1.08E-03 | -2.99 | EPS8         |
| A_32_P11499  | 8.78E-07 | 2.12E-09 | -2.61 | UBE2N        |
| A_23_P502464 | 7.60E-06 | 3.51E-07 | -2.27 | NOS2         |
| A_23_P414855 | 3.23E-03 | 1.40E-03 | 1.80  | PURB         |
| A_24_P32935  | 7.47E-03 | 3.66E-03 | -1.92 | FOLR2        |
| A_32_P68459  | 3.31E-05 | 4.64E-06 | -5.00 | PPIA         |
| A_32_P517749 | 6.84E-03 | 3.33E-03 | -1.86 | RPS6KA3      |
| A_24_P50245  | 2.36E-05 | 2.71E-06 | -3.31 | HLA-DMA      |
| A_23_P146943 | 1.92E-04 | 4.69E-05 | -4.56 | ATP1B1       |
| A_23_P126278 | 1.22E-02 | 6.39E-03 | 2.46  | CHIT1        |
| A_32_P175934 | 9.35E-05 | 1.94E-05 | 10.02 | CD48         |
| A_23_P113716 | 7.07E-06 | 2.91E-07 | -2.38 | HLA-C        |
| A_24_P150361 | 1.66E-06 | 1.51E-08 | -3.09 | HSP90B1      |
| A_24_P393711 | 1.82E-03 | 7.22E-04 | 4.24  | ABL1         |
| A_23_P201238 | 1.43E-04 | 3.25E-05 | -2.24 | SNX27        |
| A_23_P145301 | 8.96E-04 | 3.12E-04 | 3.31  | NFKBIL1      |
| A_23_P11372  | 8.02E-05 | 1.57E-05 | -2.51 | HPRT1        |
| A_23_P102471 | 9.29E-06 | 5.97E-07 | -3.31 | MSH2         |
| A_23_P55828  | 2.45E-05 | 2.88E-06 | 2.16  | CCL25        |
| A_24_P389218 | 6.39E-03 | 3.08E-03 | 3.43  | ARHGEF5      |
| A_23_P204702 | 9.94E-07 | 3.21E-09 | -3.43 | TMBIM6       |
| A_23_P32463  | 2.88E-05 | 3.71E-06 | -2.23 | EXOSC4       |
| A_23_P342009 | 2.83E-04 | 7.77E-05 | -2.28 | <b>HFE</b>   |
| A_23_P210176 | 5.04E-05 | 8.35E-06 | -2.23 | ITGA6        |
| A_23_P158481 | 1.53E-04 | 3.58E-05 | 3.21  | CYP2C19      |
| A_23_P376060 | 2.73E-05 | 3.44E-06 | -3.48 | IKZF3        |

|              |          |          |       |              |
|--------------|----------|----------|-------|--------------|
| A_23_P61748  | 8.19E-05 | 1.61E-05 | -2.45 | COL4A3BP     |
| A_23_P87036  | 2.57E-06 | 4.28E-08 | 2.82  | APOA4        |
| A_23_P71774  | 1.33E-02 | 7.03E-03 | 2.12  | IFNB1        |
| A_24_P344251 | 3.49E-04 | 9.99E-05 | 6.06  | ITGAX        |
| A_23_P37441  | 1.14E-05 | 8.06E-07 | -4.39 | B2M          |
| A_23_P114783 | 5.52E-05 | 9.49E-06 | -2.60 | <b>PARP1</b> |
| A_23_P69368  | 7.21E-04 | 2.41E-04 | 2.89  | TF           |
| A_24_P300777 | 4.53E-05 | 7.18E-06 | -1.85 | ADAM8        |
| A_23_P214444 | 1.68E-05 | 1.63E-06 | -4.37 | TAP2         |
| A_32_P209960 | 3.36E-03 | 1.46E-03 | -4.27 | CIITA        |
| A_24_P141481 | 1.11E-05 | 7.70E-07 | -2.21 | CD59         |
| A_24_P311926 | 9.26E-06 | 5.92E-07 | -2.60 | HLA-G        |
| A_32_P140656 | 3.39E-03 | 1.48E-03 | -3.01 | IL6ST        |
| A_23_P109143 | 6.08E-05 | 1.08E-05 | -3.42 | PRNP         |
| A_23_P105264 | 9.39E-03 | 4.75E-03 | -3.03 | ETV6         |
| A_24_P418717 | 7.58E-05 | 1.45E-05 | 3.75  | BMPR1A       |
| A_23_P411296 | 1.29E-05 | 1.01E-06 | -1.86 | CEBPB        |
| A_23_P11995  | 3.70E-06 | 9.54E-08 | -2.72 | PRDX1        |
| A_23_P306148 | 2.69E-04 | 7.28E-05 | 4.30  | PML          |
| A_23_P346309 | 8.59E-03 | 4.29E-03 | -2.09 | <b>BAX</b>   |
| A_23_P34345  | 3.56E-03 | 1.57E-03 | 3.66  | VCAM1        |
| A_23_P130815 | 3.40E-03 | 1.49E-03 | -1.99 | KIR2DS2      |
| A_23_P61945  | 1.00E-04 | 2.11E-05 | -2.75 | MITF         |
| A_23_P139786 | 2.17E-03 | 8.79E-04 | -1.91 | OASL         |
| A_23_P254801 | 1.47E-03 | 5.57E-04 | 1.81  | PLCG1        |
| A_23_P109928 | 7.30E-06 | 3.26E-07 | -3.41 | PSMD6        |
| A_23_P54991  | 2.98E-05 | 3.93E-06 | -2.89 | DYNLL2       |
| A_23_P500034 | 6.28E-04 | 2.04E-04 | 1.94  | GLI2         |
| A_23_P86470  | 2.93E-04 | 8.11E-05 | -1.69 | CH25H        |
| A_23_P397933 | 9.56E-04 | 3.37E-04 | 3.58  | MASP1        |
| A_24_P162483 | 2.20E-05 | 2.39E-06 | 7.02  | ANK1         |
| A_23_P164536 | 2.72E-04 | 7.39E-05 | -2.48 | PIK3C3       |
| A_24_P261760 | 1.45E-04 | 3.31E-05 | 3.59  | KLRG1        |
| A_32_P177024 | 3.67E-05 | 5.37E-06 | -2.78 | SBDS         |
| A_23_P85503  | 4.24E-04 | 1.28E-04 | -2.53 | PGLYRP4      |
| A_24_P276853 | 1.29E-03 | 4.79E-04 | 2.16  | GON4L        |
| A_23_P47034  | 4.12E-03 | 1.86E-03 | -1.57 | HHEX         |
| A_24_P397817 | 6.68E-07 | 3.63E-10 | 5.80  | LEP          |
| A_23_P168761 | 1.50E-05 | 1.32E-06 | -2.74 | PTPRZ1       |
| A_24_P252078 | 1.81E-02 | 1.01E-02 | 1.76  | BTN3A2       |
| A_23_P91019  | 6.23E-06 | 2.39E-07 | -2.12 | PRKRA        |
| A_23_P100872 | 7.92E-03 | 3.91E-03 | 2.58  | HOXB3        |
| A_23_P215900 | 2.28E-05 | 2.55E-06 | -2.30 | SCARA3       |
| A_24_P45446  | 1.19E-02 | 6.20E-03 | -1.56 | GBP4         |
| A_23_P14769  | 1.04E-02 | 5.31E-03 | 1.97  | FES          |
| A_23_P86635  | 2.19E-02 | 1.26E-02 | 1.97  | DCLRE1C      |
| A_23_P373031 | 8.09E-05 | 1.58E-05 | -3.75 | CACNA1C      |
| A_23_P92410  | 9.05E-05 | 1.85E-05 | -2.66 | <b>CASP3</b> |
| A_23_P147185 | 1.02E-05 | 6.71E-07 | -2.26 | CANX         |
| A_23_P38505  | 2.47E-04 | 6.46E-05 | -2.60 | CXCL16       |

|              |          |          |       |             |
|--------------|----------|----------|-------|-------------|
| A_24_P766716 | 2.55E-02 | 1.48E-02 | 1.88  | CMKLR1      |
| A_23_P52697  | 2.89E-05 | 3.76E-06 | -2.02 | CD248       |
| A_24_P389517 | 9.84E-06 | 6.45E-07 | -2.07 | HNRNPK      |
| A_24_P41850  | 3.69E-04 | 1.07E-04 | 3.48  | MASP1       |
| A_23_P314202 | 3.93E-03 | 1.75E-03 | 4.13  | PAPD4       |
| A_23_P207582 | 7.09E-06 | 2.99E-07 | 3.23  | CCL16       |
| A_23_P212179 | 2.24E-03 | 9.14E-04 | 3.72  | HRH1        |
| A_24_P403734 | 4.26E-05 | 6.60E-06 | -2.36 | ZNF385A     |
| A_23_P38519  | 2.11E-02 | 1.20E-02 | -1.93 | ITGB3       |
| A_23_P134419 | 3.62E-04 | 1.04E-04 | 1.74  | ZP3         |
| A_23_P6263   | 3.03E-04 | 8.48E-05 | -2.24 | MX2         |
| A_24_P101201 | 1.70E-04 | 4.05E-05 | -3.28 | PDIA3       |
| A_24_P103469 | 4.54E-03 | 2.08E-03 | 2.83  | LST1        |
| A_23_P149345 | 3.20E-05 | 4.35E-06 | -2.95 | PTPN22      |
| A_23_P134147 | 1.45E-04 | 3.34E-05 | -1.66 | ZBTB24      |
| A_23_P253345 | 1.16E-03 | 4.24E-04 | -2.58 | C8orf4      |
| A_24_P367432 | 6.76E-04 | 2.24E-04 | 3.26  | IGHV1-69    |
| A_24_P245589 | 6.19E-05 | 1.12E-05 | 2.93  | PLVAP       |
| A_23_P392501 | 4.58E-05 | 7.28E-06 | -2.95 | TNRC6C      |
| A_23_P17575  | 1.95E-05 | 1.99E-06 | -3.21 | AHCY        |
| A_23_P11729  | 3.18E-04 | 8.97E-05 | 2.31  | ZBTB7B      |
| A_23_P160638 | 1.33E-02 | 7.05E-03 | 2.15  | BGLAP       |
| A_23_P204536 | 1.41E-05 | 1.16E-06 | -2.10 | SENP1       |
| A_23_P326885 | 3.73E-02 | 2.30E-02 | -2.12 | SIX4        |
| A_23_P213745 | 7.62E-05 | 1.46E-05 | -2.48 | CXCL14      |
| A_23_P202905 | 9.55E-05 | 1.99E-05 | 4.12  | TIRAP       |
| A_23_P34093  | 1.09E-03 | 3.92E-04 | 2.34  | G6PD        |
| A_32_P25273  | 4.60E-05 | 7.37E-06 | -3.28 | HSPD1       |
| A_23_P101141 | 5.33E-03 | 2.50E-03 | -2.20 | RNF125      |
| A_23_P8913   | 1.68E-05 | 1.61E-06 | -2.81 | CA2         |
| A_23_P67332  | 4.24E-05 | 6.51E-06 | -1.58 | NR1H2       |
| A_23_P149281 | 3.89E-06 | 1.13E-07 | 3.38  | EPHA2       |
| A_32_P232865 | 6.76E-03 | 3.28E-03 | 3.78  | BCR         |
| A_23_P163787 | 2.73E-06 | 5.00E-08 | 2.55  | <b>MMP2</b> |
| A_24_P402080 | 1.44E-05 | 1.21E-06 | -2.02 | MBP         |
| A_23_P25644  | 6.68E-07 | 8.25E-10 | -2.29 | PCID2       |
| A_23_P85693  | 1.02E-03 | 3.63E-04 | 2.64  | GBP2        |
| A_23_P250353 | 1.46E-05 | 1.25E-06 | -2.57 | HERC6       |
| A_23_P99027  | 2.15E-05 | 2.29E-06 | -2.80 | PTPN11      |
| A_23_P72737  | 2.20E-05 | 2.38E-06 | -2.63 | IFITM1      |
| A_24_P249072 | 1.71E-05 | 1.68E-06 | -1.60 | BTN2A2      |
| A_24_P92472  | 1.52E-05 | 1.36E-06 | 3.99  | CFI         |
| A_23_P79066  | 2.41E-04 | 6.23E-05 | -2.30 | SPPL2B      |
| A_23_P367676 | 4.00E-06 | 1.18E-07 | -2.72 | SIN3A       |
| A_23_P204654 | 1.47E-04 | 3.40E-05 | 11.61 | KITLG       |
| A_23_P2801   | 2.70E-02 | 1.58E-02 | -1.73 | ELF1        |
| A_23_P102122 | 1.81E-05 | 1.81E-06 | -2.79 | ARPC2       |
| A_23_P79161  | 3.88E-06 | 1.11E-07 | -1.64 | PRELID1     |
| A_23_P165007 | 1.95E-02 | 1.10E-02 | -2.57 | RASGRP4     |
| A_23_P116286 | 2.47E-05 | 2.93E-06 | -2.81 | AMPD3       |

|              |          |          |       |              |
|--------------|----------|----------|-------|--------------|
| A_24_P380919 | 5.10E-05 | 8.54E-06 | -2.22 | HNRNPK       |
| A_23_P206585 | 6.08E-05 | 1.08E-05 | -4.04 | <b>PRKCB</b> |
| A_23_P158484 | 1.77E-05 | 1.75E-06 | 9.51  | CYP2C19      |
| A_23_P37191  | 3.13E-06 | 6.39E-08 | -3.28 | PSMB5        |
| A_24_P209047 | 7.59E-04 | 2.56E-04 | 6.03  | IL5          |
| A_23_P7961   | 1.48E-03 | 5.66E-04 | -3.21 | PGC          |
| A_24_P269779 | 1.54E-02 | 8.41E-03 | 3.00  | CHST3        |
| A_23_P164773 | 1.17E-05 | 8.46E-07 | 2.57  | FCER2        |
| A_23_P19592  | 2.50E-05 | 3.03E-06 | -1.56 | PGM3         |
| A_24_P388252 | 5.24E-05 | 8.86E-06 | -4.56 | PPP3R1       |
| A_23_P59657  | 6.00E-06 | 2.19E-07 | -2.43 | CUL1         |
| A_23_P56069  | 2.73E-06 | 5.07E-08 | -1.69 | LSM14A       |
| A_23_P214798 | 3.81E-06 | 1.01E-07 | -3.48 | SYNCRIP      |
| A_23_P202334 | 1.66E-05 | 1.59E-06 | -3.71 | FGFR2        |
| A_24_P57367  | 3.51E-02 | 2.14E-02 | 3.49  | AHCY         |
| A_23_P44112  | 8.96E-05 | 1.83E-05 | -1.90 | LAT          |
| A_23_P155539 | 3.32E-04 | 9.40E-05 | 2.15  | POU1F1       |
| A_23_P104199 | 1.55E-04 | 3.62E-05 | -1.70 | ITGB1        |
| A_23_P347070 | 1.26E-06 | 6.41E-09 | -2.71 | PAG1         |
| A_23_P119778 | 7.30E-06 | 3.22E-07 | -2.00 | SLC39A10     |
| A_23_P334083 | 1.65E-03 | 6.40E-04 | 3.75  | TRIM14       |
| A_23_P124108 | 1.34E-02 | 7.10E-03 | -2.59 | ITGAM        |
| A_24_P110937 | 4.69E-03 | 2.16E-03 | 2.20  | PCID2        |
| A_24_P370682 | 2.78E-04 | 7.58E-05 | -3.13 | TRIM11       |
| A_24_P98524  | 9.26E-06 | 5.90E-07 | -4.02 | PPP3CB       |
| A_23_P210048 | 5.93E-05 | 1.04E-05 | -4.28 | HDAC4        |
| A_23_P66682  | 4.00E-05 | 6.06E-06 | -3.35 | HOXB6        |
| A_23_P163390 | 1.03E-04 | 2.19E-05 | -2.21 | CHRNA7       |
| A_23_P97990  | 4.45E-04 | 1.36E-04 | -3.10 | HTRA1        |
| A_23_P348194 | 4.11E-03 | 1.85E-03 | 2.49  | PRKCE        |
| A_24_P209571 | 1.41E-05 | 1.14E-06 | -3.59 | YWHAZ        |
| A_23_P518    | 6.51E-04 | 2.13E-04 | 7.60  | VTCN1        |
| A_23_P402319 | 3.23E-03 | 1.40E-03 | -2.13 | GAPT         |
| A_23_P17663  | 2.95E-05 | 3.86E-06 | -2.66 | MX1          |
| A_23_P56195  | 6.68E-07 | 1.26E-09 | -2.21 | UBA52        |
| A_32_P116203 | 1.39E-02 | 7.40E-03 | 1.99  | NCF1         |
| A_23_P124252 | 8.32E-06 | 4.35E-07 | -2.08 | CAMK1D       |
| A_24_P373096 | 5.59E-05 | 9.70E-06 | 3.92  | TGFB3        |
| A_23_P381976 | 9.03E-03 | 4.55E-03 | -2.34 | OGT          |
| A_23_P41999  | 3.40E-02 | 2.06E-02 | -1.47 | SMAP1        |
| A_23_P250910 | 1.41E-05 | 1.17E-06 | -2.02 | UBQLN1       |
| A_23_P142361 | 8.96E-04 | 3.11E-04 | 3.11  | PIK3R2       |
| A_23_P143143 | 7.51E-04 | 2.52E-04 | -3.14 | ID2          |
| A_23_P203053 | 2.04E-03 | 8.20E-04 | 2.21  | NCAM1        |
| A_23_P79518  | 2.05E-02 | 1.16E-02 | -1.64 | IL1B         |
| A_24_P108401 | 1.47E-03 | 5.60E-04 | -3.72 | KLK3         |
| A_23_P356755 | 3.14E-05 | 4.20E-06 | -1.91 | CEBPG        |
| A_23_P369919 | 2.73E-06 | 5.14E-08 | -3.28 | RAB4A        |
| A_23_P30122  | 4.59E-06 | 1.48E-07 | 2.11  | IL2          |
| A_32_P11477  | 2.04E-06 | 2.80E-08 | -3.59 | FAU          |

|              |          |          |       |          |
|--------------|----------|----------|-------|----------|
| A_24_P196534 | 7.72E-05 | 1.49E-05 | -3.09 | PKNOX1   |
| A_24_P772061 | 1.30E-05 | 1.03E-06 | -4.31 | PPIA     |
| A_23_P76529  | 5.26E-03 | 2.46E-03 | -1.97 | ITGB7    |
| A_23_P45185  | 4.63E-03 | 2.13E-03 | -1.90 | FIGF     |
| A_24_P381901 | 1.16E-02 | 6.00E-03 | -2.14 | CX3CL1   |
| A_23_P169331 | 1.37E-02 | 7.28E-03 | 1.56  | TRAF2    |
| A_24_P62708  | 3.07E-04 | 8.61E-05 | -3.75 | PRKACB   |
| A_23_P47709  | 7.61E-03 | 3.74E-03 | -2.46 | FOLR2    |
| A_23_P156562 | 9.21E-06 | 5.75E-07 | -2.54 | CRIP3    |
| A_23_P117298 | 3.49E-02 | 2.12E-02 | 1.59  | F7       |
| A_23_P122027 | 2.58E-05 | 3.17E-06 | -4.56 | KIF3A    |
| A_23_P150609 | 6.45E-04 | 2.11E-04 | -2.69 | IGF2     |
| A_23_P128503 | 6.05E-04 | 1.95E-04 | 2.94  | IL26     |
| A_23_P168692 | 2.44E-04 | 6.37E-05 | 2.70  | DBNL     |
| A_23_P251562 | 1.45E-04 | 3.34E-05 | -2.96 | TUSC2    |
| A_24_P379379 | 3.18E-02 | 1.91E-02 | 2.84  | CAPZA1   |
| A_24_P222655 | 1.03E-02 | 5.29E-03 | 2.34  | C1QA     |
| A_23_P63584  | 1.38E-04 | 3.15E-05 | -2.48 | AHCTF1   |
| A_32_P7721   | 2.04E-06 | 2.76E-08 | -4.57 | RORA     |
| A_23_P129956 | 7.25E-06 | 3.10E-07 | -2.69 | DUSP3    |
| A_24_P135856 | 4.93E-04 | 1.54E-04 | 2.66  | RHD      |
| A_23_P301133 | 1.22E-05 | 9.01E-07 | -4.16 | IP6K2    |
| A_23_P119143 | 6.59E-05 | 1.20E-05 | -2.10 | ICAM5    |
| A_23_P209740 | 2.30E-05 | 2.58E-06 | -2.91 | PSMD1    |
| A_32_P92295  | 8.41E-06 | 4.59E-07 | -2.85 | RPL13A   |
| A_23_P401106 | 3.81E-04 | 1.11E-04 | -3.45 | PDE2A    |
| A_24_P239676 | 1.47E-03 | 5.59E-04 | -2.13 | HLA-DQB1 |
| A_32_P151933 | 3.22E-03 | 1.39E-03 | -1.52 | FECH     |
| A_23_P98282  | 8.34E-06 | 4.40E-07 | -2.79 | SPTBN2   |
| A_23_P74290  | 8.86E-03 | 4.45E-03 | 3.00  | GBP5     |
| A_32_P217709 | 4.24E-06 | 1.29E-07 | -2.22 | RAC1     |
| A_23_P75523  | 2.16E-05 | 2.32E-06 | -2.88 | CD59     |
| A_24_P272061 | 1.18E-05 | 8.52E-07 | -3.25 | RPL13A   |
| A_24_P42755  | 3.36E-02 | 2.03E-02 | -1.73 | FLT1     |
| A_23_P134125 | 4.58E-05 | 7.31E-06 | -1.95 | MAP3K5   |
| A_23_P120845 | 2.68E-05 | 3.35E-06 | -4.08 | XBP1     |
| A_24_P397928 | 1.60E-05 | 1.48E-06 | -2.13 | CTSB     |
| A_23_P408708 | 8.32E-06 | 4.36E-07 | -3.06 | BNIP3L   |
| A_23_P73239  | 2.78E-04 | 7.57E-05 | -2.05 | NCKAP1   |
| A_23_P23759  | 2.45E-03 | 1.02E-03 | 5.62  | CFHR5    |
| A_23_P88119  | 6.46E-05 | 1.17E-05 | -3.67 | HSPH1    |
| A_23_P205567 | 9.12E-06 | 5.61E-07 | -2.18 | PRKCH    |
| A_24_P356406 | 8.69E-05 | 1.75E-05 | -2.99 | PAFAH1B1 |
| A_23_P15705  | 2.73E-06 | 5.05E-08 | -2.52 | PSMB6    |
| A_23_P420873 | 3.15E-04 | 8.88E-05 | -2.52 | NR1D1    |
| A_23_P134484 | 3.65E-03 | 1.62E-03 | 6.02  | CALCR    |
| A_24_P245298 | 2.82E-04 | 7.75E-05 | -3.67 | TNFSF12  |
| A_23_P29225  | 1.67E-06 | 1.75E-08 | -2.82 | FBXO7    |
| A_23_P38446  | 1.96E-06 | 2.25E-08 | -2.31 | TNFAIP1  |
| A_23_P106741 | 2.02E-05 | 2.11E-06 | -3.75 | PSMD7    |

|              |          |          |       |           |
|--------------|----------|----------|-------|-----------|
| A_24_P940979 | 5.71E-03 | 2.71E-03 | 2.35  | LGALS8    |
| A_23_P68007  | 1.91E-05 | 1.93E-06 | -2.38 | ATP1B3    |
| A_23_P121480 | 9.09E-05 | 1.87E-05 | -3.40 | CD200     |
| A_23_P37375  | 1.17E-04 | 2.57E-05 | -2.85 | RPS6KA5   |
| A_23_P51926  | 1.32E-02 | 7.01E-03 | 1.74  | PTAFR     |
| A_24_P304071 | 4.46E-02 | 2.83E-02 | 2.74  | IFIT2     |
| A_24_P329600 | 5.74E-06 | 1.94E-07 | -3.68 | UBQLN1    |
| A_23_P92042  | 8.40E-06 | 4.56E-07 | -4.83 | ITPR1     |
| A_23_P123112 | 1.71E-05 | 1.67E-06 | 2.21  | ABCB4     |
| A_32_P162183 | 1.06E-04 | 2.28E-05 | -2.25 | C2        |
| A_24_P165998 | 1.70E-04 | 4.05E-05 | 4.39  | GATA2     |
| A_23_P209129 | 3.55E-04 | 1.02E-04 | 8.53  | LAIR2     |
| A_23_P254594 | 6.70E-03 | 3.25E-03 | 3.27  | GNRH1     |
| A_23_P107623 | 2.81E-04 | 7.70E-05 | 5.95  | SERPINB12 |
| A_23_P106002 | 1.98E-05 | 2.04E-06 | -2.31 | NFKBIA    |
| A_23_P24211  | 2.08E-03 | 8.37E-04 | 2.73  | MMP21     |
| A_23_P154235 | 5.24E-04 | 1.67E-04 | -2.19 | NMI       |
| A_23_P120254 | 5.53E-06 | 1.86E-07 | -2.58 | DUSP22    |
| A_24_P12573  | 2.15E-02 | 1.23E-02 | 4.24  | CCL26     |
| A_24_P345679 | 5.17E-03 | 2.41E-03 | -1.74 | MLF1      |
| A_24_P355944 | 3.90E-05 | 5.80E-06 | -1.87 | EFNB2     |
| A_23_P69012  | 6.52E-05 | 1.18E-05 | 3.11  | CCR8      |
| A_23_P36364  | 7.57E-05 | 1.44E-05 | -4.72 | THY1      |
| A_23_P305680 | 1.43E-03 | 5.41E-04 | -3.15 | IGF1R     |
| A_24_P383480 | 7.19E-03 | 3.51E-03 | 4.18  | PROS1     |
| A_23_P88630  | 1.68E-05 | 1.62E-06 | -2.64 | BLM       |
| A_23_P6099   | 2.94E-04 | 8.15E-05 | -4.01 | PLCB1     |
| A_24_P408206 | 1.27E-03 | 4.71E-04 | 1.64  | PRKACA    |
| A_23_P213326 | 6.12E-05 | 1.09E-05 | -1.99 | ANKHD1    |
| A_32_P203917 | 4.10E-03 | 1.85E-03 | -2.81 | C9        |
| A_23_P407565 | 3.54E-04 | 1.02E-04 | -3.21 | CX3CR1    |
| A_23_P366376 | 8.89E-06 | 5.32E-07 | 3.38  | TDGF1     |
| A_23_P321892 | 5.04E-03 | 2.34E-03 | -3.09 | HRG       |
| A_23_P137139 | 2.82E-02 | 1.66E-02 | 2.26  | BTBK      |
| A_23_P163178 | 1.56E-05 | 1.42E-06 | -5.84 | CALM1     |
| A_24_P338121 | 8.69E-05 | 1.75E-05 | 4.89  | UBQLN1    |
| A_23_P102988 | 7.99E-04 | 2.72E-04 | 7.14  | TXNRD2    |
| A_24_P342178 | 2.56E-04 | 6.84E-05 | -2.94 | STAT5B    |
| A_23_P26783  | 2.21E-04 | 5.60E-05 | -4.09 | PSMD3     |
| A_23_P156928 | 6.32E-03 | 3.04E-03 | 1.69  | GPLD1     |
| A_24_P125335 | 2.90E-04 | 8.03E-05 | -3.80 | CCL13     |
| A_24_P838748 | 5.34E-03 | 2.51E-03 | -2.66 | WIPF2     |
| A_23_P147025 | 7.85E-05 | 1.52E-05 | -3.80 | RAB33A    |
| A_24_P294851 | 3.18E-04 | 8.98E-05 | 7.10  | TRIM38    |
| A_23_P38346  | 8.68E-06 | 4.99E-07 | -2.07 | DHX58     |
| A_24_P359856 | 4.38E-05 | 6.86E-06 | 2.73  | HDAC4     |
| A_23_P31921  | 4.35E-03 | 1.98E-03 | 3.27  | ASS1      |
| A_23_P72568  | 2.62E-05 | 3.24E-06 | -3.77 | SNX4      |
| A_24_P84419  | 1.19E-02 | 6.20E-03 | -2.34 | VAV2      |
| A_23_P104193 | 1.33E-05 | 1.07E-06 | -2.66 | ITGB1     |

|              |          |          |       |          |
|--------------|----------|----------|-------|----------|
| A_23_P365614 | 7.55E-04 | 2.54E-04 | -1.83 | NOTCH4   |
| A_23_P94412  | 4.80E-03 | 2.22E-03 | 3.19  | PDCD1LG2 |
| A_23_P47955  | 7.91E-04 | 2.68E-04 | 3.58  | OAS3     |
| A_24_P122050 | 1.21E-02 | 6.31E-03 | 2.34  | PSMF1    |
| A_24_P408704 | 1.17E-03 | 4.28E-04 | 6.69  | DOCK2    |
| A_24_P149314 | 1.96E-05 | 2.01E-06 | 7.54  | ULBP2    |
| A_23_P103334 | 1.46E-02 | 7.90E-03 | -2.36 | RC3H1    |
| A_23_P317636 | 4.62E-03 | 2.13E-03 | -2.38 | ADD2     |
| A_23_P407614 | 7.88E-04 | 2.67E-04 | 3.59  | PYDC1    |
| A_23_P152782 | 4.52E-04 | 1.39E-04 | -1.99 | IFI35    |
| A_23_P154108 | 1.08E-06 | 4.91E-09 | -3.23 | DYNC1I2  |
| A_24_P364335 | 1.26E-06 | 7.76E-09 | -3.55 | CLEC2D   |
| A_24_P29277  | 8.40E-06 | 4.46E-07 | -2.36 | COL4A3BP |
| A_32_P165611 | 2.50E-05 | 3.02E-06 | -2.86 | KIF13B   |
| A_23_P62652  | 2.45E-02 | 1.42E-02 | 2.73  | SLAMF1   |
| A_23_P1206   | 2.46E-05 | 2.92E-06 | -3.17 | RPS24    |
| A_24_P313186 | 8.53E-06 | 4.70E-07 | -4.31 | CALM1    |
| A_23_P85903  | 4.90E-02 | 3.16E-02 | 1.61  | TLR5     |
| A_23_P362659 | 1.60E-05 | 1.49E-06 | -2.59 | MYD88    |
| A_24_P199774 | 2.48E-05 | 2.95E-06 | 4.08  | TINAGL1  |
| A_23_P117721 | 1.52E-05 | 1.35E-06 | -2.65 | RPS17    |
| A_23_P142380 | 6.68E-07 | 9.44E-10 | -1.81 | AKAP8    |
| A_24_P347488 | 1.13E-04 | 2.47E-05 | -3.35 | PSMC1    |
| A_23_P34018  | 2.62E-03 | 1.11E-03 | -2.72 | RPL39    |
| A_24_P51517  | 9.36E-04 | 3.29E-04 | 1.83  | FGR      |
| A_23_P77073  | 2.22E-03 | 9.08E-04 | -1.93 | SPPL2A   |
| A_23_P23584  | 5.37E-05 | 9.20E-06 | -2.43 | CTNBP1   |
| A_23_P143845 | 9.21E-06 | 5.71E-07 | -2.93 | TIPARP   |
| A_24_P304760 | 2.69E-02 | 1.57E-02 | 2.45  | SIN3A    |
| A_23_P212034 | 5.10E-05 | 8.54E-06 | -3.75 | DLG1     |
| A_23_P325155 | 2.36E-04 | 6.05E-05 | 2.86  | CD200R1  |
| A_23_P330262 | 7.93E-03 | 3.91E-03 | 2.11  | PIP5K1C  |
| A_24_P923591 | 2.05E-04 | 5.09E-05 | 6.09  | PPIL2    |
| A_23_P329112 | 1.07E-03 | 3.83E-04 | 1.75  | JAK3     |
| A_23_P77876  | 6.68E-07 | 1.08E-09 | -2.48 | PSMD12   |
| A_24_P933319 | 1.02E-04 | 2.16E-05 | -3.92 | RAB3B    |
| A_23_P29555  | 1.62E-04 | 3.82E-05 | -2.83 | SEC13    |
| A_24_P100228 | 1.65E-02 | 9.06E-03 | 2.26  | XBP1     |
| A_23_P86216  | 1.67E-06 | 1.75E-08 | -3.15 | PSMA5    |
| A_23_P251173 | 9.94E-07 | 2.70E-09 | -2.95 | EIF2AK1  |
| A_23_P433588 | 2.93E-04 | 8.12E-05 | -5.57 | EFNB3    |
| A_23_P259741 | 4.78E-04 | 1.49E-04 | -4.31 | SATB1    |
| A_23_P134827 | 3.40E-06 | 7.90E-08 | -2.81 | ASH2L    |
| A_23_P71867  | 2.04E-06 | 2.81E-08 | -1.78 | IL11RA   |
| A_32_P181638 | 6.37E-04 | 2.08E-04 | -3.93 | BVES     |
| A_23_P143987 | 1.30E-02 | 6.85E-03 | -2.12 | ATG7     |
| A_24_P381494 | 2.81E-05 | 3.60E-06 | -2.21 | SLC11A2  |
| A_23_P203215 | 1.81E-02 | 1.01E-02 | -1.72 | CXCR5    |
| A_24_P108451 | 7.63E-05 | 1.46E-05 | -3.93 | GPI      |
| A_24_P345993 | 8.40E-06 | 4.55E-07 | -2.40 | CANX     |

|              |          |          |       |          |
|--------------|----------|----------|-------|----------|
| A_24_P56467  | 3.35E-05 | 4.75E-06 | -2.64 | GMPR2    |
| A_24_P20607  | 3.64E-04 | 1.05E-04 | 2.91  | CXCL11   |
| A_23_P420209 | 1.82E-04 | 4.42E-05 | 3.92  | GCNT3    |
| A_24_P257539 | 1.57E-02 | 8.59E-03 | -1.83 | FBXW11   |
| A_23_P217236 | 2.60E-05 | 3.21E-06 | -1.84 | HMGB3    |
| A_23_P163079 | 2.87E-02 | 1.70E-02 | 4.61  | GCH1     |
| A_24_P944519 | 1.52E-02 | 8.26E-03 | -2.47 | PDE4D    |
| A_23_P417282 | 1.89E-04 | 4.60E-05 | -1.77 | IGF1R    |
| A_23_P164022 | 6.19E-05 | 1.12E-05 | -3.54 | MYO1C    |
| A_24_P65722  | 1.10E-02 | 5.66E-03 | 2.26  | LILRB4   |
| A_23_P141405 | 1.46E-05 | 1.26E-06 | -3.44 | NME2     |
| A_24_P932418 | 1.50E-04 | 3.50E-05 | -2.76 | AP2A2    |
| A_24_P190894 | 9.27E-05 | 1.92E-05 | -3.24 | ARF1     |
| A_24_P335620 | 2.05E-04 | 5.13E-05 | -2.18 | SLC7A5   |
| A_23_P152804 | 6.11E-06 | 2.32E-07 | -2.83 | NME1     |
| A_24_P64781  | 3.39E-02 | 2.05E-02 | -4.30 | KITLG    |
| A_24_P941643 | 1.03E-05 | 6.88E-07 | -6.55 | PLCB1    |
| A_23_P120942 | 6.04E-05 | 1.07E-05 | -4.25 | XRCC6    |
| A_32_P104075 | 1.40E-05 | 1.13E-06 | -2.13 | PAK2     |
| A_32_P17765  | 7.62E-04 | 2.57E-04 | 2.26  | LGR4     |
| A_23_P89798  | 1.81E-05 | 1.81E-06 | -2.44 | FECH     |
| A_24_P124672 | 1.22E-05 | 9.03E-07 | -3.97 | DYNLL1   |
| A_23_P90497  | 1.94E-04 | 4.75E-05 | 2.01  | LILRA4   |
| A_23_P374862 | 6.10E-03 | 2.91E-03 | -1.79 | CD55     |
| A_23_P3562   | 3.28E-05 | 4.56E-06 | -2.05 | SLC7A6OS |
| A_23_P128993 | 1.12E-02 | 5.81E-03 | 1.76  | GZMH     |
| A_23_P200598 | 1.97E-04 | 4.85E-05 | -1.88 | MUL1     |
| A_23_P132526 | 3.58E-02 | 2.20E-02 | 2.02  | PIK3R4   |
| A_23_P69109  | 6.94E-04 | 2.31E-04 | -2.13 | PLSCR1   |
| A_23_P365719 | 2.43E-05 | 2.84E-06 | -2.14 | TAPBP    |
| A_24_P28657  | 4.42E-04 | 1.35E-04 | -1.67 | AHCTF1   |
| A_24_P722216 | 7.26E-05 | 1.37E-05 | -3.31 | DHTKD1   |
| A_23_P121037 | 4.35E-04 | 1.32E-04 | 8.19  | PODXL2   |
| A_23_P61881  | 1.80E-04 | 4.34E-05 | -2.46 | ARIH2    |
| A_32_P99275  | 5.52E-05 | 9.50E-06 | -1.92 | YTHDF2   |
| A_23_P132159 | 2.56E-03 | 1.07E-03 | -1.91 | USP18    |
| A_23_P46819  | 5.73E-05 | 9.96E-06 | -2.68 | BTRC     |
| A_24_P310894 | 1.66E-05 | 1.57E-06 | -3.58 | CAPZA1   |
| A_24_P166663 | 1.22E-05 | 8.92E-07 | -2.99 | CDK6     |
| A_32_P220307 | 4.57E-04 | 1.41E-04 | -3.86 | RPL39    |
| A_24_P285158 | 1.22E-05 | 9.10E-07 | -4.24 | FCRLB    |
| A_23_P57497  | 3.68E-03 | 1.63E-03 | 2.79  | MYH9     |
| A_23_P151915 | 2.14E-02 | 1.22E-02 | 3.64  | GCNT3    |
| A_23_P214208 | 5.83E-05 | 1.02E-05 | -2.64 | CNR1     |
| A_23_P143120 | 5.42E-03 | 2.55E-03 | -2.21 | ADAM17   |
| A_23_P258418 | 1.05E-03 | 3.76E-04 | 4.17  | TNIP2    |
| A_23_P406438 | 2.80E-05 | 3.56E-06 | -3.53 | SRPK2    |
| A_23_P6762   | 1.41E-05 | 1.16E-06 | -2.57 | JAGN1    |
| A_32_P96807  | 2.50E-04 | 6.55E-05 | -2.68 | RC3H1    |
| A_24_P404822 | 2.43E-05 | 2.82E-06 | -2.41 | APLN     |

|              |          |          |       |               |
|--------------|----------|----------|-------|---------------|
| A_23_P45871  | 8.84E-06 | 5.20E-07 | -2.53 | IFI44L        |
| A_23_P500601 | 1.26E-06 | 6.64E-09 | -2.10 | TRIM4         |
| A_24_P246173 | 8.68E-06 | 4.92E-07 | -3.22 | MYO9B         |
| A_23_P51187  | 2.41E-04 | 6.22E-05 | -3.27 | <b>PRKCZ</b>  |
| A_23_P74278  | 1.24E-05 | 9.55E-07 | -2.25 | PDE4B         |
| A_32_P460973 | 5.83E-05 | 1.02E-05 | -2.79 | HLA-E         |
| A_23_P37727  | 4.47E-04 | 1.37E-04 | -3.72 | CX3CL1        |
| A_23_P360167 | 1.44E-05 | 1.23E-06 | -2.39 | DCTN2         |
| A_32_P7502   | 8.95E-04 | 3.10E-04 | 2.49  | CD96          |
| A_23_P6464   | 3.52E-03 | 1.55E-03 | -2.29 | PLA2G6        |
| A_23_P501732 | 3.03E-04 | 8.47E-05 | 4.72  | FCN2          |
| A_24_P284893 | 6.58E-06 | 2.58E-07 | -1.94 | PSMB2         |
| A_23_P39735  | 1.10E-05 | 7.51E-07 | 3.11  | IL18R1        |
| A_23_P113245 | 8.68E-06 | 4.95E-07 | -4.38 | RBPJ          |
| A_24_P143574 | 7.60E-04 | 2.56E-04 | 3.26  | SIRPB1        |
| A_24_P221424 | 2.37E-04 | 6.11E-05 | 1.69  | ZNF784        |
| A_23_P170820 | 1.56E-04 | 3.66E-05 | -2.92 | PUM1          |
| A_23_P23438  | 1.75E-03 | 6.88E-04 | -2.67 | SEMA4A        |
| A_23_P12392  | 1.36E-03 | 5.09E-04 | 6.09  | PTPRC         |
| A_23_P41344  | 2.58E-05 | 3.15E-06 | 4.66  | EREG          |
| A_23_P120125 | 5.30E-05 | 8.98E-06 | -2.61 | COLEC11       |
| A_23_P200670 | 1.59E-03 | 6.14E-04 | 1.52  | WDR78         |
| A_24_P935033 | 8.27E-05 | 1.63E-05 | 9.48  | IL6ST         |
| A_23_P211299 | 6.66E-04 | 2.20E-04 | -2.38 | PKNOX1        |
| A_23_P433753 | 4.68E-05 | 7.57E-06 | -3.36 | PRKAR1A       |
| A_23_P136325 | 6.22E-03 | 2.98E-03 | 2.10  | WIPF2         |
| A_23_P138352 | 7.41E-03 | 3.62E-03 | 2.60  | WNT2B         |
| A_23_P166122 | 4.14E-04 | 1.24E-04 | -2.92 | POLR3F        |
| A_23_P338479 | 7.67E-04 | 2.59E-04 | -2.66 | CD274         |
| A_32_P66881  | 6.11E-05 | 1.09E-05 | -1.75 | TLR4          |
| A_23_P24004  | 4.92E-05 | 8.12E-06 | -2.72 | IFIT2         |
| A_24_P208081 | 2.25E-04 | 5.73E-05 | 2.58  | PLA2G2F       |
| A_23_P153390 | 2.73E-03 | 1.16E-03 | -1.62 | CLEC4G        |
| A_23_P255126 | 1.53E-03 | 5.88E-04 | 2.95  | GAB3          |
| A_23_P67288  | 1.46E-05 | 1.27E-06 | -2.34 | CALR          |
| A_23_P93360  | 6.25E-04 | 2.03E-04 | -3.87 | AGER          |
| A_23_P32253  | 6.89E-06 | 2.78E-07 | -1.87 | NFIL3         |
| A_23_P350574 | 2.19E-03 | 8.90E-04 | -1.78 | FCRLB         |
| A_24_P105771 | 7.98E-06 | 3.95E-07 | -2.12 | ACTR3         |
| A_24_P131752 | 8.16E-06 | 4.13E-07 | -3.56 | DLG1          |
| A_23_P156117 | 2.73E-04 | 7.41E-05 | -3.57 | <b>CYFIP2</b> |
| A_24_P382319 | 6.29E-03 | 3.02E-03 | -4.19 | CEACAM1       |
| A_23_P421483 | 1.08E-03 | 3.88E-04 | 6.26  | CEACAM6       |
| A_23_P128974 | 2.76E-02 | 1.62E-02 | 2.18  | BATF          |
| A_23_P120744 | 4.13E-05 | 6.30E-06 | -3.48 | MCM3AP        |
| A_32_P15017  | 1.40E-02 | 7.49E-03 | 6.03  | RICTOR        |
| A_23_P134176 | 4.00E-05 | 6.06E-06 | -1.95 | <b>SOD2</b>   |
| A_23_P111288 | 1.26E-05 | 9.81E-07 | -2.78 | TMEM14C       |
| A_24_P481844 | 8.19E-05 | 1.61E-05 | 4.67  | HLA-DMB       |
| A_23_P83192  | 7.77E-06 | 3.74E-07 | -2.48 | PHPT1         |

|              |          |          |       |              |
|--------------|----------|----------|-------|--------------|
| A_23_P106080 | 3.83E-03 | 1.71E-03 | 3.14  | RNASE7       |
| A_23_P118306 | 4.87E-05 | 8.03E-06 | -3.06 | DNAJA3       |
| A_23_P354341 | 2.94E-04 | 8.17E-05 | 3.01  | CD160        |
| A_32_P67533  | 6.00E-06 | 2.15E-07 | -1.48 | L3MBTL3      |
| A_23_P166280 | 3.16E-05 | 4.26E-06 | -2.69 | ICOSLG       |
| A_23_P156687 | 4.27E-05 | 6.63E-06 | 3.03  | CFB          |
| A_23_P166087 | 1.22E-05 | 9.15E-07 | -3.54 | RASSF2       |
| A_24_P322741 | 1.32E-03 | 4.91E-04 | -2.48 | IL10RB       |
| A_23_P45059  | 8.71E-06 | 5.04E-07 | -4.49 | DOCK1        |
| A_23_P31188  | 2.33E-05 | 2.66E-06 | 3.39  | GIMAP1       |
| A_32_P310335 | 3.10E-04 | 8.71E-05 | -2.14 | JAM2         |
| A_24_P233570 | 4.77E-05 | 7.78E-06 | -3.34 | PSMB1        |
| A_24_P85317  | 4.38E-05 | 6.86E-06 | 3.07  | CHD2         |
| A_23_P201193 | 8.18E-04 | 2.80E-04 | 2.70  | TSPAN2       |
| A_24_P98109  | 5.45E-04 | 1.74E-04 | -2.50 | SNX10        |
| A_24_P13032  | 1.47E-04 | 3.42E-05 | -2.11 | UBE2D1       |
| A_23_P219144 | 3.09E-05 | 4.13E-06 | -2.85 | CLTA         |
| A_24_P940815 | 3.39E-03 | 1.48E-03 | -2.16 | SGPL1        |
| A_24_P252497 | 3.62E-04 | 1.04E-04 | -2.32 | TRIB1        |
| A_32_P35969  | 4.12E-03 | 1.86E-03 | -2.01 | CHRFAM7A     |
| A_24_P940006 | 2.81E-05 | 3.60E-06 | -3.87 | EFNB3        |
| A_23_P501996 | 2.92E-05 | 3.80E-06 | -3.16 | UBE2V1       |
| A_23_P34402  | 2.48E-05 | 2.98E-06 | -3.44 | NCSTN        |
| A_23_P99942  | 1.66E-03 | 6.45E-04 | -2.06 | LRRK1        |
| A_23_P143526 | 3.21E-06 | 6.82E-08 | -3.29 | <b>S100B</b> |
| A_32_P11471  | 4.70E-05 | 7.64E-06 | -3.35 | FAU          |
| A_24_P273972 | 2.79E-02 | 1.64E-02 | 4.59  | CFH          |
| A_24_P355876 | 4.10E-04 | 1.22E-04 | -3.11 | TMBIM6       |
| A_24_P381625 | 1.98E-05 | 2.05E-06 | -2.27 | PSMC6        |
| A_23_P71268  | 1.55E-03 | 5.97E-04 | 3.23  | AZGP1        |
| A_23_P7185   | 6.80E-05 | 1.25E-05 | 5.34  | STAP1        |
| A_23_P86917  | 5.09E-05 | 8.46E-06 | -2.49 | FADD         |
| A_23_P107735 | 1.07E-04 | 2.32E-05 | -3.18 | CD79A        |
| A_24_P319364 | 2.46E-05 | 2.90E-06 | -1.86 | F11R         |
| A_24_P38951  | 9.52E-04 | 3.34E-04 | -3.53 | RELT         |
| A_23_P252193 | 5.37E-05 | 9.20E-06 | -3.68 | ITGA9        |
| A_23_P164307 | 1.96E-04 | 4.82E-05 | -3.63 | MINK1        |
| A_32_P26092  | 9.78E-04 | 3.47E-04 | 1.82  | TNFRSF4      |
| A_23_P29566  | 3.42E-02 | 2.07E-02 | 1.85  | ARPC4        |
| A_23_P215599 | 7.53E-06 | 3.44E-07 | -3.11 | SRPK2        |
| A_23_P201551 | 1.03E-05 | 6.92E-07 | -3.37 | VAV3         |
| A_23_P5761   | 4.65E-04 | 1.44E-04 | -3.24 | NFE2L2       |
| A_23_P124642 | 2.00E-05 | 2.07E-06 | -2.91 | RASGRP1      |
| A_23_P212508 | 4.35E-05 | 6.78E-06 | -3.78 | TF           |
| A_23_P165691 | 7.35E-06 | 3.30E-07 | -2.96 | PSMD14       |
| A_23_P206396 | 2.98E-05 | 3.92E-06 | -2.25 | CKLF         |
| A_23_P10127  | 2.80E-05 | 3.54E-06 | -3.84 | SFRP1        |
| A_24_P184031 | 8.21E-06 | 4.26E-07 | -2.08 | PHPT1        |
| A_23_P87310  | 4.74E-04 | 1.47E-04 | -2.20 | LMO1         |
| A_24_P246787 | 2.54E-03 | 1.06E-03 | -2.33 | REST         |

|              |          |          |       |               |
|--------------|----------|----------|-------|---------------|
| A_23_P54006  | 3.11E-06 | 6.10E-08 | -2.60 | HECTD1        |
| A_23_P26847  | 2.37E-04 | 6.12E-05 | -2.09 | SOX9          |
| A_23_P370005 | 2.44E-03 | 1.01E-03 | 2.27  | RIPK1         |
| A_23_P69058  | 1.67E-06 | 1.73E-08 | -3.14 | MLH1          |
| A_23_P359091 | 5.39E-03 | 2.53E-03 | 1.67  | SMAD3         |
| A_23_P55251  | 7.38E-03 | 3.61E-03 | 2.74  | ITGA3         |
| A_24_P72420  | 3.26E-03 | 1.41E-03 | -1.98 | ELMO1         |
| A_23_P19352  | 1.87E-04 | 4.54E-05 | 2.54  | CNPY3         |
| A_23_P148047 | 4.51E-03 | 2.07E-03 | 2.27  | PTGER4        |
| A_23_P500300 | 7.42E-05 | 1.41E-05 | 4.11  | TRIM15        |
| A_24_P48403  | 7.98E-06 | 3.92E-07 | -3.60 | YES1          |
| A_23_P372874 | 1.87E-04 | 4.54E-05 | -2.40 | S100A13       |
| A_23_P70867  | 1.71E-03 | 6.69E-04 | -2.01 | SBDS          |
| A_24_P334445 | 3.83E-05 | 5.69E-06 | -2.91 | MAEA          |
| A_23_P92623  | 4.32E-04 | 1.31E-04 | -3.55 | <b>PPP3CA</b> |
| A_23_P59005  | 1.64E-06 | 1.41E-08 | -2.03 | TAP1          |
| A_24_P29876  | 6.78E-06 | 2.71E-07 | -2.55 | AGPAT5        |
| A_23_P369960 | 3.84E-04 | 1.12E-04 | 3.58  | NCAPH2        |
| A_23_P97265  | 6.60E-05 | 1.20E-05 | -2.88 | GPATCH4       |
| A_24_P89708  | 4.41E-04 | 1.34E-04 | 3.77  | IMPDH1        |
| A_23_P132444 | 3.81E-05 | 5.63E-06 | -3.25 | TCEA1         |
| A_32_P820503 | 5.35E-06 | 1.77E-07 | -3.28 | FTH1          |
| A_24_P148762 | 3.66E-04 | 1.06E-04 | 5.26  | IL1RAP        |
| A_24_P169234 | 2.30E-03 | 9.45E-04 | 2.13  | ZAP70         |
| A_24_P941824 | 2.12E-06 | 3.01E-08 | -2.66 | KIF3B         |
| A_23_P154840 | 8.45E-05 | 1.68E-05 | -4.56 | <b>SOD1</b>   |
| A_24_P418809 | 8.56E-06 | 4.83E-07 | -3.04 | GNAS          |
| A_24_P100419 | 2.68E-04 | 7.23E-05 | 10.63 | EDA           |
| A_32_P197489 | 6.92E-05 | 1.29E-05 | -3.40 | KLF13         |
| A_24_P116017 | 1.49E-03 | 5.71E-04 | 3.86  | PSMD9         |
| A_24_P146892 | 2.68E-03 | 1.13E-03 | -2.53 | ORAI1         |
| A_24_P173823 | 7.98E-06 | 3.88E-07 | -2.58 | PBX1          |
| A_23_P125423 | 2.56E-04 | 6.80E-05 | -2.19 | C1R           |
| A_24_P13230  | 8.79E-05 | 1.78E-05 | -2.54 | RAB6A         |
| A_23_P113311 | 4.29E-05 | 6.67E-06 | -3.74 | P4HTM         |
| A_23_P140807 | 8.53E-06 | 4.68E-07 | -2.86 | PSMB10        |
| A_23_P364517 | 8.71E-05 | 1.76E-05 | -3.32 | SELK          |
| A_23_P393425 | 1.21E-03 | 4.46E-04 | -2.01 | PAPD4         |
| A_23_P75921  | 6.72E-04 | 2.22E-04 | -1.59 | TRAF6         |
| A_23_P55649  | 2.55E-02 | 1.49E-02 | -2.46 | FPR2          |
| A_32_P7118   | 8.12E-06 | 4.07E-07 | -2.88 | PSMC6         |
| A_24_P337592 | 9.84E-03 | 5.01E-03 | 1.81  | BTN2A2        |
| A_23_P67669  | 1.57E-05 | 1.44E-06 | 2.44  | PGLYRP2       |
| A_24_P381962 | 7.93E-05 | 1.54E-05 | -2.94 | AP1G1         |
| A_23_P35906  | 3.22E-05 | 4.41E-06 | -1.95 | CASP4         |
| A_23_P55477  | 4.54E-03 | 2.08E-03 | -1.98 | ADORA2B       |
| A_24_P299507 | 3.03E-04 | 8.48E-05 | 3.02  | REST          |
| A_24_P326082 | 1.17E-05 | 8.46E-07 | -2.43 | HLA-E         |
| A_23_P49021  | 1.02E-05 | 6.72E-07 | -3.21 | WDR61         |
| A_24_P286465 | 1.17E-04 | 2.58E-05 | -2.78 | PURB          |

|              |          |          |       |          |
|--------------|----------|----------|-------|----------|
| A_23_P502170 | 1.50E-02 | 8.13E-03 | 2.61  | DYNC2LI1 |
| A_23_P351215 | 1.11E-05 | 7.67E-07 | 9.48  | SKIL     |
| A_23_P126992 | 3.61E-04 | 1.04E-04 | -2.40 | ABI1     |
| A_23_P51361  | 1.02E-04 | 2.18E-05 | 3.18  | TXLNA    |
| A_32_P12639  | 9.94E-07 | 3.18E-09 | -2.94 | PSMD12   |
| A_24_P298409 | 1.11E-05 | 7.67E-07 | -2.86 | HLA-C    |
| A_23_P34644  | 1.11E-05 | 7.79E-07 | 2.08  | FCGR2B   |
| A_23_P404536 | 6.77E-05 | 1.25E-05 | 1.70  | ENPP3    |
| A_24_P381199 | 4.63E-04 | 1.43E-04 | 6.66  | TRIM6    |
| A_23_P146468 | 1.41E-05 | 1.15E-06 | 5.75  | VAV2     |
| A_24_P172304 | 3.26E-05 | 4.49E-06 | 3.34  | ADAMTS13 |
| A_23_P41159  | 3.77E-03 | 1.68E-03 | 2.85  | PPP4R2   |
| A_24_P246943 | 1.66E-05 | 1.59E-06 | -3.70 | PPIA     |
| A_24_P31275  | 3.38E-04 | 9.59E-05 | -2.83 | ATP1B2   |
| A_24_P159866 | 9.78E-03 | 4.97E-03 | 3.27  | STK11    |
| A_23_P88781  | 8.52E-05 | 1.71E-05 | -2.95 | CIAPIN1  |
| A_24_P235248 | 1.22E-04 | 2.72E-05 | -3.19 | PTPRZ1   |
| A_23_P203900 | 1.37E-04 | 3.12E-05 | -3.51 | SCARB1   |
| A_23_P126825 | 2.40E-05 | 2.77E-06 | -2.35 | SLC16A1  |
| A_23_P80382  | 1.04E-03 | 3.72E-04 | -2.26 | PRR5     |
| A_24_P286013 | 7.91E-06 | 3.83E-07 | -2.37 | UBE2K    |
| A_23_P27215  | 1.79E-05 | 1.78E-06 | -3.27 | UBB      |
| A_23_P385690 | 2.07E-02 | 1.18E-02 | -3.39 | WNT3A    |
| A_24_P353638 | 2.40E-03 | 9.97E-04 | 3.57  | SLAMF7   |
| A_23_P54878  | 2.30E-02 | 1.32E-02 | -3.23 | ITGAL    |
| A_23_P368624 | 3.31E-02 | 2.00E-02 | -2.37 | CHRN2    |
| A_23_P73837  | 1.14E-02 | 5.90E-03 | 3.04  | TLR8     |
| A_24_P82142  | 6.05E-06 | 2.26E-07 | -2.05 | TCF12    |
| A_24_P115774 | 2.80E-05 | 3.55E-06 | -1.83 | BIRC2    |
| A_23_P100576 | 2.66E-04 | 7.16E-05 | -2.43 | PSMB3    |
| A_24_P940599 | 4.69E-03 | 2.16E-03 | 2.75  | SYNCRIP  |
| A_24_P261326 | 3.93E-05 | 5.87E-06 | -2.44 | ACTR1A   |
| A_24_P227211 | 1.94E-02 | 1.09E-02 | -2.56 | KLC2     |
| A_23_P112103 | 1.79E-03 | 7.06E-04 | 2.58  | GSDMD    |
| A_24_P228700 | 1.19E-02 | 6.20E-03 | 6.16  | THOC5    |
| A_23_P147388 | 1.30E-05 | 1.02E-06 | -2.74 | KIF13B   |
| A_24_P114739 | 3.51E-06 | 8.39E-08 | -2.98 | CAMK2D   |
| A_24_P65779  | 1.96E-06 | 2.46E-08 | -1.68 | UBA52    |
| A_23_P115460 | 1.01E-06 | 4.08E-09 | -1.92 | RPL22    |
| A_32_P9700   | 2.37E-06 | 3.82E-08 | -2.19 | PSMC1    |
| A_23_P502553 | 4.15E-03 | 1.88E-03 | -2.39 | TRIM35   |
| A_24_P251040 | 4.14E-02 | 2.58E-02 | -2.66 | ARTN     |
| A_24_P392201 | 6.94E-04 | 2.31E-04 | 2.68  | TBC1D10C |
| A_23_P59507  | 1.88E-02 | 1.05E-02 | -2.40 | SH2B2    |
| A_23_P34744  | 7.68E-05 | 1.48E-05 | -2.11 | CTSK     |
| A_23_P52425  | 4.47E-04 | 1.37E-04 | 9.41  | NKX2-3   |
| A_24_P273666 | 3.17E-05 | 4.27E-06 | -4.49 | GNAS     |
| A_23_P380181 | 5.02E-05 | 8.32E-06 | -4.25 | LMO4     |
| A_23_P8981   | 1.22E-05 | 9.21E-07 | -2.09 | STAR     |
| A_23_P171249 | 1.67E-06 | 1.69E-08 | -1.84 | IGBP1    |

|              |          |          |       |          |
|--------------|----------|----------|-------|----------|
| A_23_P17560  | 6.07E-03 | 2.90E-03 | 6.29  | KIF3B    |
| A_32_P69368  | 3.25E-05 | 4.46E-06 | -2.80 | ID2      |
| A_23_P62932  | 4.10E-04 | 1.22E-04 | -4.28 | ATP1B1   |
| A_23_P8513   | 3.82E-05 | 5.65E-06 | -4.92 | SNX10    |
| A_23_P9362   | 2.40E-05 | 2.76E-06 | -2.78 | PSMB7    |
| A_23_P151471 | 4.59E-06 | 1.47E-07 | -1.99 | CUL4A    |
| A_24_P346277 | 7.30E-06 | 3.15E-07 | -2.09 | SRF      |
| A_23_P156531 | 3.28E-06 | 7.15E-08 | -3.58 | PSMB1    |
| A_23_P374844 | 2.79E-04 | 7.63E-05 | -4.05 | GAL      |
| A_23_P169576 | 1.15E-05 | 8.18E-07 | -3.23 | EXOC6    |
| A_23_P49097  | 2.05E-04 | 5.09E-05 | 4.17  | IL17C    |
| A_24_P180165 | 3.26E-03 | 1.41E-03 | 3.02  | IL1RAP   |
| A_23_P86599  | 1.80E-02 | 1.00E-02 | -1.92 | DMBT1    |
| A_23_P310350 | 2.25E-04 | 5.74E-05 | -1.82 | SHPK     |
| A_23_P24616  | 2.44E-04 | 6.34E-05 | -3.48 | SIAE     |
| A_23_P55373  | 5.15E-04 | 1.63E-04 | 4.70  | ALOX15   |
| A_23_P30666  | 1.56E-05 | 1.42E-06 | -3.33 | TNFRSF21 |
| A_23_P113204 | 6.14E-05 | 1.10E-05 | -4.34 | FGF3     |
| A_23_P24389  | 4.82E-02 | 3.10E-02 | 3.01  | CCDC88B  |
| A_23_P84565  | 5.59E-05 | 9.69E-06 | -2.95 | POLR3D   |
| A_24_P8892   | 4.59E-06 | 1.46E-07 | -1.77 | HDAC4    |
| A_24_P269814 | 2.30E-04 | 5.88E-05 | -2.37 | PLEKHA1  |
| A_23_P119562 | 1.15E-02 | 5.97E-03 | 1.98  | CFD      |
| A_23_P113634 | 9.31E-04 | 3.26E-04 | -2.12 | CBFB     |
| A_23_P131785 | 6.21E-05 | 1.12E-05 | 5.20  | BPI      |
| A_23_P6935   | 3.96E-05 | 5.94E-06 | -2.43 | CD47     |
| A_23_P151610 | 1.26E-06 | 7.59E-09 | -1.90 | PSME1    |
| A_23_P41217  | 1.43E-03 | 5.38E-04 | 3.46  | CD200R1  |
| A_23_P341471 | 3.41E-06 | 8.07E-08 | -2.38 | UBE2N    |
| A_23_P365817 | 3.51E-05 | 5.06E-06 | -2.58 | PPP1R14B |
| A_24_P913210 | 1.09E-02 | 5.61E-03 | -2.45 | SLC11A2  |
| A_24_P134266 | 1.36E-03 | 5.07E-04 | -2.60 | BSG      |
| A_23_P101636 | 2.86E-03 | 1.22E-03 | 4.26  | KIR3DL2  |
| A_23_P250122 | 3.55E-05 | 5.13E-06 | -2.35 | FAM20C   |
| A_23_P142631 | 1.60E-06 | 1.33E-08 | -2.36 | FKBP1B   |
| A_23_P136635 | 3.81E-06 | 1.00E-07 | -3.63 | AP3B1    |
| A_23_P165028 | 1.19E-02 | 6.20E-03 | 2.03  | DAPK3    |
| A_24_P408424 | 8.40E-06 | 4.56E-07 | -1.90 | MYH9     |
| A_23_P397371 | 1.79E-03 | 7.06E-04 | -2.38 | POLM     |
| A_24_P362317 | 8.53E-06 | 4.79E-07 | -2.34 | ADAR     |
| A_23_P10442  | 3.88E-06 | 1.10E-07 | -4.01 | OSBPL1A  |
| A_23_P97054  | 3.40E-03 | 1.49E-03 | 5.70  | PLA2G2F  |
| A_23_P203743 | 1.11E-05 | 7.77E-07 | -1.80 | GAB2     |
| A_24_P11506  | 1.09E-03 | 3.92E-04 | 5.70  | KYNU     |
| A_24_P402222 | 2.90E-02 | 1.72E-02 | 2.29  | HLA-DRB3 |
| A_23_P212500 | 2.44E-04 | 6.34E-05 | -4.30 | TF       |
| A_23_P14019  | 1.89E-03 | 7.51E-04 | 4.41  | APOBEC1  |
| A_24_P63950  | 1.85E-02 | 1.03E-02 | 6.42  | AP1S1    |
| A_23_P324327 | 2.33E-05 | 2.66E-06 | -2.84 | GPRC5B   |
| A_24_P113109 | 9.09E-05 | 1.87E-05 | -3.98 | UBB      |

|              |          |          |       |             |
|--------------|----------|----------|-------|-------------|
| A_23_P349928 | 1.52E-05 | 1.37E-06 | -3.30 | SP100       |
| A_24_P402588 | 4.64E-05 | 7.46E-06 | -3.75 | BCL11A      |
| A_23_P420196 | 3.08E-03 | 1.32E-03 | -3.23 | SOCS1       |
| A_23_P169351 | 1.01E-04 | 2.14E-05 | -4.46 | SH3GL2      |
| A_23_P143365 | 5.08E-04 | 1.60E-04 | 9.18  | CST9L       |
| A_23_P17345  | 1.35E-04 | 3.06E-05 | -2.29 | MAFB        |
| A_23_P167081 | 4.60E-04 | 1.42E-04 | 3.15  | REST        |
| A_24_P418239 | 3.88E-06 | 1.09E-07 | -3.54 | RPS14       |
| A_23_P138157 | 2.14E-04 | 5.38E-05 | 3.19  | OTUD7B      |
| A_23_P397391 | 2.54E-02 | 1.47E-02 | -2.58 | FFAR2       |
| A_24_P124992 | 2.73E-06 | 5.07E-08 | -3.30 | PSMA4       |
| A_23_P90143  | 7.26E-05 | 1.37E-05 | -2.75 | RPL13A      |
| A_23_P92842  | 2.04E-05 | 2.14E-06 | -2.44 | SAR1B       |
| A_24_P500621 | 2.02E-03 | 8.09E-04 | -2.91 | HIPK2       |
| A_32_P95397  | 2.59E-05 | 3.19E-06 | -3.70 | ITGB1       |
| A_32_P208120 | 3.48E-04 | 9.95E-05 | -2.55 | CAMK1D      |
| A_23_P115998 | 1.22E-03 | 4.48E-04 | 3.67  | SPI1        |
| A_23_P214554 | 2.53E-04 | 6.65E-05 | 5.06  | TRIM15      |
| A_23_P150286 | 1.32E-05 | 1.06E-06 | -2.83 | PSMA1       |
| A_23_P350467 | 8.42E-05 | 1.67E-05 | 16.04 | MAPKAPK2    |
| A_23_P428819 | 2.70E-06 | 4.64E-08 | -2.85 | AKIRIN2     |
| A_32_P193322 | 7.09E-06 | 2.99E-07 | -2.45 | RICTOR      |
| A_23_P164528 | 9.05E-05 | 1.85E-05 | -2.01 | WDR7        |
| A_24_P95038  | 1.16E-04 | 2.55E-05 | -4.17 | PPIA        |
| A_23_P250671 | 1.06E-04 | 2.29E-05 | -2.82 | <b>GPX1</b> |
| A_23_P50146  | 4.68E-02 | 3.00E-02 | -2.27 | SIGLEC15    |
| A_32_P58280  | 3.22E-04 | 9.12E-05 | 2.36  | EXOC6       |
| A_32_P128656 | 1.07E-02 | 5.49E-03 | 3.24  | MID1        |
| A_23_P123563 | 1.00E-04 | 2.11E-05 | -3.53 | RPS6        |
| A_23_P44037  | 2.97E-05 | 3.90E-06 | -3.02 | ACTG1       |
| A_23_P6596   | 7.62E-05 | 1.46E-05 | 6.79  | HES1        |
| A_23_P169189 | 2.06E-05 | 2.17E-06 | -2.41 | IKBKAP      |
| A_23_P98410  | 2.94E-05 | 3.83E-06 | 3.73  | CD3G        |
| A_23_P131024 | 2.26E-04 | 5.76E-05 | 4.70  | ZBTB32      |
| A_24_P333525 | 9.01E-06 | 5.47E-07 | -2.30 | RABGAP1L    |
| A_24_P58337  | 2.56E-05 | 3.12E-06 | -2.91 | FTH1        |
| A_32_P12820  | 9.27E-05 | 1.92E-05 | -3.67 | YWHAZ       |
| A_23_P324813 | 2.52E-04 | 6.61E-05 | 2.53  | BCL6B       |
| A_23_P353478 | 5.56E-03 | 2.62E-03 | -2.60 | CIITA       |
| A_23_P121533 | 2.80E-05 | 3.57E-06 | -2.49 | SPON2       |
| A_32_P74983  | 6.01E-05 | 1.06E-05 | -2.39 | MICB        |
| A_23_P103104 | 4.18E-03 | 1.89E-03 | -2.82 | MFNG        |
| A_23_P382081 | 2.56E-03 | 1.08E-03 | 3.61  | SPEF2       |
| A_23_P59069  | 1.04E-05 | 7.02E-07 | -1.47 | HIST1H2BO   |
| A_23_P147874 | 3.27E-05 | 4.52E-06 | -2.36 | CHID1       |
| A_23_P103414 | 2.04E-06 | 2.83E-08 | -2.86 | YTHDF2      |
| A_23_P373017 | 1.99E-02 | 1.12E-02 | -1.90 | CCL3        |
| A_23_P139585 | 2.17E-03 | 8.79E-04 | -2.06 | PDE1B       |
| A_24_P19983  | 8.84E-05 | 1.80E-05 | 3.07  | BCL10       |
| A_24_P237559 | 3.17E-03 | 1.37E-03 | 3.77  | LNPEP       |

|              |          |          |       |               |
|--------------|----------|----------|-------|---------------|
| A_23_P55936  | 1.01E-04 | 2.14E-05 | -2.42 | FCGRT         |
| A_23_P208482 | 1.03E-04 | 2.20E-05 | -4.14 | CLEC4M        |
| A_23_P70968  | 1.78E-02 | 9.88E-03 | 2.98  | HOXA7         |
| A_23_P26771  | 4.62E-04 | 1.43E-04 | 2.82  | CD300C        |
| A_23_P210763 | 4.20E-02 | 2.63E-02 | 1.81  | JAG1          |
| A_23_P126803 | 2.14E-04 | 5.37E-05 | -4.28 | ARPC5         |
| A_24_P931443 | 7.62E-06 | 3.56E-07 | -3.42 | GPR68         |
| A_24_P353794 | 4.32E-04 | 1.31E-04 | 1.73  | GALNT2        |
| A_23_P5550   | 3.69E-05 | 5.41E-06 | -3.48 | PUM2          |
| A_24_P919330 | 9.25E-06 | 5.82E-07 | -2.22 | FTH1          |
| A_23_P425750 | 2.34E-03 | 9.68E-04 | -2.98 | ARMC6         |
| A_23_P54313  | 1.27E-02 | 6.67E-03 | -2.87 | CD276         |
| A_23_P23829  | 1.94E-02 | 1.09E-02 | -2.69 | CD34          |
| A_23_P40527  | 9.55E-04 | 3.36E-04 | 8.63  | TBX1          |
| A_23_P503072 | 1.46E-04 | 3.38E-05 | 2.12  | CCL28         |
| A_23_P98022  | 1.89E-03 | 7.53E-04 | -2.11 | SIRT1         |
| A_23_P155257 | 2.28E-04 | 5.82E-05 | -2.43 | FOXP1         |
| A_23_P142835 | 1.27E-04 | 2.85E-05 | -2.36 | <b>DCTN1</b>  |
| A_24_P914134 | 5.30E-05 | 8.99E-06 | -7.64 | PRNP          |
| A_23_P15326  | 1.10E-03 | 4.00E-04 | -2.06 | TRIM25        |
| A_23_P128744 | 2.73E-02 | 1.60E-02 | -2.11 | BDKRB1        |
| A_23_P155677 | 3.85E-05 | 5.73E-06 | -1.60 | UBE2K         |
| A_23_P210482 | 2.68E-04 | 7.26E-05 | -2.42 | ADA           |
| A_23_P214046 | 8.99E-05 | 1.84E-05 | -2.42 | FBXW11        |
| A_23_P254111 | 2.22E-05 | 2.44E-06 | -3.83 | FBXO9         |
| A_23_P115732 | 8.53E-06 | 4.77E-07 | -2.75 | BMI1          |
| A_23_P204087 | 2.70E-02 | 1.58E-02 | -4.58 | OAS2          |
| A_24_P365327 | 7.12E-05 | 1.33E-05 | -1.61 | LSM14A        |
| A_23_P323823 | 1.95E-05 | 2.00E-06 | 3.67  | HIST1H2BA     |
| A_23_P166459 | 5.62E-05 | 9.76E-06 | -2.52 | LGALS1        |
| A_24_P72479  | 3.88E-06 | 1.06E-07 | -2.78 | ARPC1A        |
| A_23_P31097  | 2.22E-06 | 3.42E-08 | -3.11 | OSTM1         |
| A_23_P33752  | 7.09E-06 | 2.98E-07 | -2.02 | SLC25A6       |
| A_23_P304287 | 8.89E-06 | 5.29E-07 | -2.03 | PSMC2         |
| A_23_P407012 | 8.18E-05 | 1.60E-05 | 2.15  | CSF1          |
| A_23_P87513  | 1.04E-02 | 5.33E-03 | -2.85 | ATP6V0A2      |
| A_24_P324838 | 8.10E-04 | 2.76E-04 | 2.25  | IGHD          |
| A_23_P133424 | 3.28E-05 | 4.54E-06 | -3.76 | SKP1          |
| A_23_P167509 | 6.16E-05 | 1.11E-05 | -2.66 | <b>CYFIP2</b> |
| A_23_P329740 | 1.96E-04 | 4.83E-05 | -3.51 | UBC           |
| A_23_P19650  | 4.45E-04 | 1.36E-04 | -2.74 | VIP           |
| A_24_P133542 | 1.96E-06 | 2.39E-08 | 3.32  | PML           |
| A_23_P433760 | 2.19E-03 | 8.93E-04 | -3.37 | SPN           |
| A_23_P27677  | 3.68E-02 | 2.27E-02 | 2.25  | IRF3          |
| A_24_P681301 | 9.83E-04 | 3.50E-04 | -3.06 | UBC           |
| A_23_P64898  | 6.41E-03 | 3.09E-03 | -2.40 | KLRG1         |
| A_32_P6344   | 1.70E-05 | 1.65E-06 | -4.29 | MAP2K4        |
| A_23_P257250 | 8.82E-04 | 3.04E-04 | 5.13  | KIAA0922      |
| A_24_P889720 | 4.25E-05 | 6.57E-06 | -3.39 | UBC           |
| A_24_P194845 | 3.88E-06 | 1.06E-07 | -2.40 | RAC1          |

|              |          |          |       |          |
|--------------|----------|----------|-------|----------|
| A_24_P270814 | 4.45E-04 | 1.36E-04 | -2.71 | CRK      |
| A_24_P673786 | 1.09E-05 | 7.43E-07 | -2.76 | PIP4K2A  |
| A_23_P123503 | 8.87E-04 | 3.07E-04 | 6.08  | TRIB1    |
| A_23_P212768 | 6.94E-05 | 1.29E-05 | -2.92 | ADD1     |
| A_24_P682285 | 6.08E-05 | 1.08E-05 | 1.87  | HSPA1A   |
| A_24_P29401  | 3.47E-03 | 1.52E-03 | -2.39 | PIK3R1   |
| A_24_P344307 | 3.82E-04 | 1.12E-04 | -1.78 | PSME3    |
| A_23_P146990 | 2.20E-05 | 2.39E-06 | -3.00 | WWP1     |
| A_24_P380348 | 3.37E-02 | 2.03E-02 | -1.61 | SMAP1    |
| A_23_P84952  | 4.66E-02 | 2.99E-02 | 1.61  | TFE3     |
| A_23_P216812 | 8.89E-06 | 5.34E-07 | 9.00  | CDKN2B   |
| A_23_P218025 | 3.96E-05 | 5.94E-06 | -3.60 | KIF5A    |
| A_23_P158829 | 1.66E-04 | 3.94E-05 | -2.09 | ARRB2    |
| A_24_P411561 | 5.91E-03 | 2.81E-03 | 2.77  | HAVCR2   |
| A_32_P168349 | 3.80E-02 | 2.35E-02 | -2.67 | C6orf25  |
| A_23_P9232   | 1.85E-05 | 1.86E-06 | 3.44  | GCNT1    |
| A_24_P940909 | 2.03E-03 | 8.14E-04 | 2.77  | TTC7A    |
| A_24_P335781 | 2.53E-04 | 6.69E-05 | -1.97 | ADCYAP1  |
| A_23_P53856  | 6.23E-06 | 2.38E-07 | -1.89 | N4BP2L2  |
| A_23_P63017  | 2.24E-05 | 2.47E-06 | -2.77 | LGALS8   |
| A_23_P74928  | 4.70E-05 | 7.66E-06 | 2.92  | MR1      |
| A_23_P94338  | 1.74E-05 | 1.71E-06 | -3.17 | ENPP2    |
| A_24_P69538  | 1.47E-02 | 7.93E-03 | 2.13  | TLR4     |
| A_24_P598836 | 1.21E-04 | 2.70E-05 | -2.21 | ITGB1    |
| A_24_P87931  | 1.58E-05 | 1.46E-06 | -1.55 | APOL1    |
| A_24_P335656 | 2.79E-02 | 1.64E-02 | -3.04 | SECTM1   |
| A_23_P51996  | 1.58E-05 | 1.45E-06 | -2.53 | STXBP3   |
| A_24_P411186 | 4.00E-04 | 1.18E-04 | -5.34 | BCL11A   |
| A_23_P80528  | 1.38E-03 | 5.16E-04 | 2.99  | TIGIT    |
| A_24_P792734 | 4.53E-05 | 7.19E-06 | -3.85 | PSMC6    |
| A_24_P226554 | 3.53E-06 | 8.86E-08 | -2.29 | ACTB     |
| A_23_P6943   | 2.46E-03 | 1.02E-03 | -2.65 | GPR15    |
| A_23_P89192  | 4.64E-05 | 7.46E-06 | 3.11  | EPX      |
| A_24_P341897 | 5.12E-03 | 2.39E-03 | -2.27 | ACVR1B   |
| A_24_P801264 | 2.00E-04 | 4.94E-05 | -2.43 | HMGB1    |
| A_23_P332820 | 2.74E-02 | 1.61E-02 | -2.78 | IL17A    |
| A_23_P354074 | 4.93E-04 | 1.55E-04 | -2.42 | LYST     |
| A_23_P118888 | 3.13E-06 | 6.35E-08 | -1.90 | PAFAH1B1 |
| A_23_P124542 | 1.12E-04 | 2.44E-05 | -4.19 | CR2      |
| A_24_P279704 | 4.94E-05 | 8.17E-06 | -3.48 | MAG      |
| A_24_P162073 | 3.47E-02 | 2.11E-02 | 1.91  | BCR      |
| A_23_P46482  | 4.85E-05 | 7.98E-06 | 3.83  | IL20     |
| A_23_P331748 | 2.49E-03 | 1.04E-03 | 1.97  | CD33     |
| A_23_P10232  | 4.83E-02 | 3.11E-02 | -2.72 | BANK1    |
| A_23_P343303 | 6.11E-03 | 2.92E-03 | -2.29 | GFI1B    |
| A_23_P332713 | 3.41E-03 | 1.49E-03 | -2.52 | ZFR2     |
| A_23_P256470 | 1.33E-04 | 2.99E-05 | -3.51 | NPY      |
| A_23_P370434 | 2.98E-05 | 3.92E-06 | -3.18 | C1QBP    |
| A_23_P125977 | 2.17E-03 | 8.78E-04 | 2.72  | C1QC     |
| A_23_P419947 | 1.02E-03 | 3.63E-04 | -2.37 | MLF1     |

|              |          |          |       |          |
|--------------|----------|----------|-------|----------|
| A_24_P231513 | 1.24E-05 | 9.54E-07 | -2.16 | ACTR3    |
| A_24_P936758 | 3.60E-03 | 1.59E-03 | -3.76 | IGF2     |
| A_23_P211985 | 8.64E-03 | 4.33E-03 | 2.07  | SNRK     |
| A_23_P166219 | 3.36E-02 | 2.03E-02 | 4.46  | GABPA    |
| A_32_P57870  | 1.50E-04 | 3.49E-05 | -3.47 | PSMC1    |
| A_24_P82200  | 1.24E-02 | 6.50E-03 | 1.88  | MEIS2    |
| A_24_P53595  | 1.43E-03 | 5.40E-04 | 6.05  | GNAS     |
| A_23_P167674 | 7.39E-05 | 1.40E-05 | -2.10 | F12      |
| A_23_P9688   | 5.91E-05 | 1.03E-05 | -2.80 | DYNC1LI2 |
| A_23_P210939 | 3.20E-05 | 4.36E-06 | -2.68 | EIF6     |
| A_23_P393598 | 3.89E-06 | 1.14E-07 | 2.77  | CD276    |
| A_23_P171296 | 2.60E-05 | 3.20E-06 | -2.96 | MPP1     |
| A_24_P76267  | 1.07E-03 | 3.84E-04 | -2.10 | GGT1     |
| A_24_P938293 | 4.65E-05 | 7.51E-06 | -2.00 | HES1     |
| A_23_P82929  | 7.74E-06 | 3.68E-07 | -2.97 | NOV      |
| A_23_P65031  | 2.06E-05 | 2.18E-06 | -4.25 | DYNLL1   |
| A_23_P65370  | 1.04E-05 | 7.04E-07 | -3.50 | GLRX5    |
| A_23_P35755  | 4.11E-02 | 2.57E-02 | -3.79 | TYR      |
| A_24_P472055 | 4.59E-03 | 2.11E-03 | -2.75 | RNF125   |
| A_23_P258837 | 3.81E-04 | 1.11E-04 | 5.28  | ORAI1    |
| A_23_P213204 | 1.26E-06 | 6.76E-09 | -1.79 | WHSC1    |
| A_23_P76538  | 9.98E-05 | 2.09E-05 | -3.56 | TESC     |
| A_23_P166371 | 8.92E-03 | 4.48E-03 | -2.19 | VPREB3   |
| A_23_P111381 | 5.74E-06 | 1.96E-07 | -2.66 | ATG5     |
| A_32_P170003 | 3.87E-04 | 1.14E-04 | -2.19 | TRAF3IP1 |
| A_32_P162726 | 1.77E-03 | 6.96E-04 | -2.82 | EXOSC6   |
| A_23_P122174 | 4.21E-02 | 2.64E-02 | -2.09 | XRCC4    |
| A_23_P99980  | 6.90E-05 | 1.28E-05 | -3.15 | HMGB1    |
| A_23_P153372 | 2.63E-04 | 7.07E-05 | -2.57 | HSH2D    |
| A_23_P97632  | 7.19E-06 | 3.05E-07 | -2.88 | EPRS     |
| A_24_P236949 | 3.87E-02 | 2.40E-02 | 2.43  | C19orf66 |
| A_23_P159956 | 2.90E-02 | 1.72E-02 | 1.53  | MID2     |
| A_23_P254120 | 1.40E-04 | 3.19E-05 | -3.65 | FBXO9    |
| A_23_P120002 | 4.65E-05 | 7.49E-06 | 2.41  | SP110    |
| A_23_P71624  | 1.97E-02 | 1.11E-02 | -1.86 | PAX5     |
| A_23_P205929 | 9.39E-05 | 1.95E-05 | -2.97 | DPP8     |
| A_32_P210252 | 4.59E-05 | 7.34E-06 | -2.83 | RPL22    |
| A_23_P75453  | 2.32E-04 | 5.96E-05 | -2.49 | MEN1     |
| A_24_P916522 | 4.40E-02 | 2.78E-02 | -2.03 | PAX5     |
| A_24_P362737 | 2.67E-05 | 3.32E-06 | -2.99 | FOXP1    |
| A_23_P134851 | 2.46E-04 | 6.42E-05 | 2.45  | DOK2     |
| A_23_P107351 | 1.34E-04 | 3.03E-05 | -3.31 | NLRP1    |
| A_24_P13381  | 1.16E-03 | 4.21E-04 | 2.51  | TRPV4    |
| A_23_P59426  | 8.87E-04 | 3.07E-04 | -1.72 | PAXIP1   |
| A_24_P935026 | 1.51E-04 | 3.52E-05 | -2.95 | STK4     |
| A_32_P342064 | 1.14E-04 | 2.49E-05 | -5.33 | FTH1     |
| A_23_P8281   | 1.14E-05 | 8.08E-07 | -2.52 | IFNGR1   |
| A_23_P5273   | 7.32E-04 | 2.45E-04 | 4.97  | SBNO2    |
| A_23_P348636 | 1.25E-02 | 6.55E-03 | 1.76  | FOXJ1    |
| A_23_P140648 | 2.81E-04 | 7.69E-05 | -2.03 | CYFIP1   |

|              |          |          |       |               |
|--------------|----------|----------|-------|---------------|
| A_23_P29773  | 4.68E-02 | 3.00E-02 | -2.01 | LAMP3         |
| A_24_P402242 | 4.70E-05 | 7.65E-06 | 3.34  | COL3A1        |
| A_24_P374244 | 5.91E-03 | 2.81E-03 | 3.68  | GATA1         |
| A_23_P250358 | 8.52E-03 | 4.25E-03 | 6.15  | HERC6         |
| A_24_P278637 | 1.27E-02 | 6.68E-03 | 4.10  | FADD          |
| A_32_P97489  | 4.00E-05 | 6.02E-06 | -2.22 | YWHAZ         |
| A_32_P43217  | 5.11E-05 | 8.59E-06 | -4.01 | PSMA6         |
| A_23_P145238 | 8.65E-04 | 2.97E-04 | -2.52 | HIST1H2BK     |
| A_23_P35256  | 9.04E-04 | 3.14E-04 | 2.94  | POLR3C        |
| A_24_P370952 | 5.09E-05 | 8.49E-06 | 4.30  | LAX1          |
| A_23_P120325 | 1.29E-04 | 2.90E-05 | -3.24 | KIF3C         |
| A_23_P211957 | 9.15E-04 | 3.19E-04 | -2.06 | TGFBR2        |
| A_23_P60742  | 9.52E-04 | 3.35E-04 | 2.60  | MYLPF         |
| A_23_P39665  | 2.76E-02 | 1.62E-02 | -1.87 | SLC11A1       |
| A_24_P873764 | 2.11E-04 | 5.27E-05 | -2.42 | BCR           |
| A_23_P4308   | 5.55E-04 | 1.78E-04 | 2.06  | PLD2          |
| A_23_P17548  | 2.54E-04 | 6.72E-05 | 4.16  | DEFB118       |
| A_23_P156017 | 1.21E-04 | 2.69E-05 | -2.81 | GOLPH3        |
| A_23_P52266  | 1.44E-05 | 1.20E-06 | -3.18 | IFIT1         |
| A_24_P414371 | 2.51E-05 | 3.06E-06 | -3.53 | <b>PPP3CA</b> |
| A_24_P76759  | 1.64E-04 | 3.90E-05 | 2.62  | FARP2         |
| A_24_P124624 | 2.72E-03 | 1.16E-03 | -1.83 | OLR1          |
| A_23_P161983 | 1.34E-02 | 7.10E-03 | -2.35 | MRGPRX4       |
| A_23_P63158  | 1.75E-02 | 9.71E-03 | 4.71  | SPTA1         |
| A_23_P54573  | 1.03E-03 | 3.70E-04 | -3.95 | ZFPM1         |
| A_23_P200560 | 3.61E-05 | 5.25E-06 | -2.76 | CDC42         |
| A_23_P76059  | 1.08E-05 | 7.32E-07 | -2.35 | DCTN2         |
| A_24_P173325 | 1.44E-05 | 1.22E-06 | -3.50 | UBA52         |
| A_23_P128930 | 1.22E-05 | 9.24E-07 | -2.23 | PSMC6         |
| A_23_P345591 | 9.05E-05 | 1.86E-05 | -1.93 | PSMA2         |
| A_23_P2601   | 2.36E-05 | 2.71E-06 | -3.43 | HSP90B1       |
| A_23_P214499 | 5.10E-05 | 8.54E-06 | 3.19  | BTN3A1        |
| A_24_P272088 | 3.08E-05 | 4.10E-06 | 1.78  | SPTB          |
| A_23_P121459 | 8.52E-05 | 1.71E-05 | 12.88 | THPO          |
| A_23_P302386 | 6.19E-04 | 2.00E-04 | 3.75  | HLA-DOA       |
| A_23_P147450 | 1.26E-06 | 9.54E-09 | -2.53 | SPG21         |
| A_23_P116898 | 4.12E-04 | 1.23E-04 | -2.89 | A2M           |
| A_23_P257956 | 2.46E-05 | 2.92E-06 | -2.91 | ILF2          |
| A_24_P45451  | 1.91E-04 | 4.66E-05 | 3.97  | SLAMF6        |
| A_24_P252945 | 2.32E-03 | 9.56E-04 | 5.95  | CXCR5         |
| A_23_P141917 | 2.45E-03 | 1.02E-03 | 3.44  | TYK2          |
| A_24_P124032 | 4.59E-06 | 1.45E-07 | -2.22 | RIPK2         |
| A_32_P416583 | 3.50E-02 | 2.13E-02 | -2.21 | NLRC5         |
| A_23_P38959  | 8.64E-03 | 4.33E-03 | 2.12  | VAV1          |
| A_23_P25735  | 7.62E-06 | 3.57E-07 | -3.50 | PSMA6         |
| A_23_P102202 | 3.40E-06 | 7.88E-08 | -1.88 | MSH6          |
| A_23_P819    | 1.44E-03 | 5.44E-04 | -1.88 | ISG15         |
| A_23_P48088  | 3.02E-04 | 8.42E-05 | -2.52 | CD27          |
| A_23_P300100 | 1.10E-03 | 3.99E-04 | 2.29  | PLA2G2D       |
| A_23_P39386  | 1.41E-03 | 5.29E-04 | -2.61 | HCST          |

|              |          |          |        |          |
|--------------|----------|----------|--------|----------|
| A_23_P219060 | 1.65E-02 | 9.04E-03 | -2.23  | GPSM3    |
| A_23_P356684 | 5.29E-06 | 1.73E-07 | -3.51  | ANLN     |
| A_32_P111565 | 1.43E-05 | 1.19E-06 | -3.02  | FTH1     |
| A_32_P880454 | 3.26E-05 | 4.50E-06 | -4.18  | APLF     |
| A_23_P162866 | 4.21E-06 | 1.27E-07 | -3.31  | HSP90AA1 |
| A_32_P24581  | 2.00E-05 | 2.08E-06 | -2.81  | RPS27A   |
| A_24_P339944 | 6.58E-04 | 2.17E-04 | 2.03   | PDGFB    |
| A_23_P137806 | 3.88E-03 | 1.73E-03 | -2.61  | MPL      |
| A_24_P125283 | 7.26E-05 | 1.37E-05 | -2.95  | HDAC5    |
| A_23_P118544 | 3.49E-05 | 5.01E-06 | -3.90  | CLTC     |
| A_23_P25433  | 2.50E-03 | 1.04E-03 | -1.87  | C12orf4  |
| A_32_P199252 | 4.45E-04 | 1.36E-04 | -3.43  | HSP90AA1 |
| A_23_P6130   | 6.00E-06 | 2.23E-07 | 2.18   | PAX1     |
| A_23_P171074 | 3.51E-05 | 5.07E-06 | -4.27  | ITM2A    |
| A_23_P207842 | 3.53E-06 | 8.79E-08 | -5.02  | RARA     |
| A_23_P103398 | 2.24E-04 | 5.69E-05 | -2.65  | PSEN2    |
| A_23_P119943 | 4.74E-04 | 1.48E-04 | -2.56  | IGFBP2   |
| A_24_P141332 | 6.61E-05 | 1.21E-05 | -2.87  | CAMK2G   |
| A_32_P175198 | 1.57E-04 | 3.69E-05 | -3.25  | ACTG1    |
| A_24_P275984 | 1.87E-03 | 7.41E-04 | 7.87   | ZNF616   |
| A_23_P138635 | 2.48E-05 | 2.98E-06 | -5.72  | BNIP3    |
| A_23_P88201  | 2.15E-06 | 3.18E-08 | -2.69  | PPP2R3C  |
| A_23_P133245 | 7.74E-06 | 3.70E-07 | -2.10  | IK       |
| A_24_P311917 | 6.56E-04 | 2.16E-04 | 2.28   | BTN3A3   |
| A_23_P256473 | 3.12E-04 | 8.76E-05 | -2.41  | SEMA3C   |
| A_24_P63019  | 2.60E-03 | 1.09E-03 | 4.54   | IL1R2    |
| A_23_P210100 | 4.29E-05 | 6.66E-06 | -2.64  | CYP26B1  |
| A_23_P502174 | 3.28E-05 | 4.56E-06 | -3.57  | DYNC2LI1 |
| A_23_P79732  | 1.35E-04 | 3.06E-05 | -3.38  | RPS27A   |
| A_23_P38894  | 2.19E-05 | 2.36E-06 | -2.43  | C19orf66 |
| A_23_P163814 | 3.35E-04 | 9.50E-05 | -3.83  | ATXN1L   |
| A_23_P20814  | 6.17E-04 | 2.00E-04 | 1.61   | DDX58    |
| A_24_P340679 | 9.05E-06 | 5.55E-07 | -3.65  | PPIA     |
| A_23_P35970  | 2.68E-04 | 7.24E-05 | -1.67  | SLC37A4  |
| A_23_P389919 | 1.44E-02 | 7.76E-03 | -1.81  | WHSC1    |
| A_24_P82106  | 5.89E-04 | 1.89E-04 | 4.73   | MMP14    |
| A_23_P367995 | 7.57E-03 | 3.72E-03 | 3.52   | PSMA8    |
| A_23_P146922 | 1.43E-02 | 7.72E-03 | 1.94   | GAS6     |
| A_23_P22444  | 2.55E-02 | 1.48E-02 | 1.68   | CFP      |
| A_23_P22378  | 1.33E-04 | 3.01E-05 | 2.96   | SOX11    |
| A_23_P115223 | 1.81E-05 | 1.82E-06 | -3.07  | HAX1     |
| A_24_P373976 | 3.14E-04 | 8.84E-05 | 14.21  | SDC4     |
| A_23_P99771  | 7.53E-05 | 1.44E-05 | -3.81  | PNMA1    |
| A_24_P166431 | 1.71E-03 | 6.72E-04 | -2.70  | TRIM10   |
| A_24_P216165 | 2.09E-04 | 5.23E-05 | -4.75  | CEBPA    |
| A_23_P10815  | 9.43E-06 | 6.09E-07 | -3.60  | PUM1     |
| A_32_P186921 | 3.29E-05 | 4.59E-06 | -1.98  | ZNF616   |
| A_23_P29953  | 1.71E-05 | 1.68E-06 | -11.09 | IL15     |
| A_23_P218369 | 2.87E-06 | 5.47E-08 | 7.86   | CCL15    |
| A_24_P154037 | 1.41E-05 | 1.16E-06 | -2.23  | IRS2     |

|              |          |          |       |           |
|--------------|----------|----------|-------|-----------|
| A_24_P105721 | 4.12E-04 | 1.23E-04 | 9.19  | CREB1     |
| A_24_P10890  | 9.50E-05 | 1.97E-05 | -3.61 | PRR5      |
| A_23_P106016 | 2.56E-04 | 6.84E-05 | -2.34 | PRKD1     |
| A_23_P250904 | 1.09E-03 | 3.95E-04 | -2.10 | UBQLN1    |
| A_23_P337242 | 1.26E-06 | 8.32E-09 | 1.92  | TGFBR2    |
| A_24_P94916  | 1.78E-02 | 9.88E-03 | 1.90  | LST1      |
| A_23_P404162 | 1.57E-02 | 8.56E-03 | -3.41 | HDAC9     |
| A_24_P284783 | 1.68E-05 | 1.62E-06 | 1.91  | PPIL2     |
| A_32_P46765  | 4.41E-05 | 6.93E-06 | -4.23 | C12orf29  |
| A_23_P218685 | 2.34E-03 | 9.62E-04 | -2.29 | UBE2V1    |
| A_23_P311875 | 4.33E-02 | 2.72E-02 | -1.86 | CD6       |
| A_23_P259863 | 1.79E-02 | 9.96E-03 | -4.14 | CD177     |
| A_23_P31323  | 2.70E-06 | 4.61E-08 | -2.25 | ACTB      |
| A_23_P321855 | 6.99E-04 | 2.33E-04 | -2.35 | ARHGEF7   |
| A_23_P165879 | 2.49E-05 | 2.99E-06 | -2.47 | RAB10     |
| A_32_P80678  | 6.14E-03 | 2.94E-03 | 2.51  | ADAM9     |
| A_23_P761    | 5.15E-05 | 8.67E-06 | -3.73 | PSMB4     |
| A_23_P130169 | 8.40E-06 | 4.55E-07 | -4.94 | TBKBP1    |
| A_24_P91272  | 4.85E-02 | 3.12E-02 | -2.55 | SOCS6     |
| A_23_P214876 | 6.14E-05 | 1.10E-05 | -1.87 | JARID2    |
| A_23_P167452 | 1.01E-04 | 2.12E-05 | 4.13  | ERAP1     |
| A_24_P116351 | 1.52E-05 | 1.36E-06 | -2.75 | SIVA1     |
| A_23_P151930 | 9.09E-03 | 4.58E-03 | -2.13 | TCF12     |
| A_23_P26815  | 8.42E-05 | 1.67E-05 | -3.00 | RILP      |
| A_23_P217384 | 6.57E-05 | 1.19E-05 | -2.36 | AP1S2     |
| A_23_P30913  | 1.65E-05 | 1.56E-06 | -2.93 | HLA-DPA1  |
| A_24_P566891 | 8.89E-06 | 5.32E-07 | -3.28 | ARF1      |
| A_23_P413641 | 6.00E-06 | 2.20E-07 | -1.89 | PREX1     |
| A_24_P22488  | 6.21E-04 | 2.01E-04 | 2.78  | AXIN1     |
| A_24_P363802 | 5.55E-04 | 1.78E-04 | -2.48 | PSMD5     |
| A_32_P134968 | 1.34E-03 | 4.98E-04 | -3.06 | SPTB      |
| A_23_P216257 | 2.25E-05 | 2.50E-06 | -3.74 | TPD52     |
| A_23_P215491 | 6.56E-03 | 3.17E-03 | -3.02 | CCL24     |
| A_23_P56188  | 3.35E-05 | 4.76E-06 | -3.73 | UBA52     |
| A_23_P258570 | 1.96E-06 | 2.30E-08 | -3.92 | PSMD10    |
| A_23_P132316 | 2.28E-05 | 2.54E-06 | 3.36  | APOBEC3D  |
| A_23_P162846 | 1.93E-04 | 4.73E-05 | -3.16 | LAMP1     |
| A_24_P849801 | 9.85E-05 | 2.06E-05 | -2.28 | RPL22     |
| A_23_P98884  | 3.40E-03 | 1.49E-03 | -2.63 | RNF41     |
| A_23_P414884 | 4.28E-04 | 1.29E-04 | -3.28 | CRHR1     |
| A_24_P399630 | 5.08E-04 | 1.60E-04 | -2.14 | PRKACA    |
| A_23_P128337 | 7.06E-06 | 2.89E-07 | -5.82 | PTMS      |
| A_23_P204304 | 1.31E-05 | 1.04E-06 | -3.76 | PTPRO     |
| A_23_P158239 | 2.34E-02 | 1.35E-02 | 1.84  | SHMT2     |
| A_23_P306500 | 9.83E-06 | 6.42E-07 | -3.10 | KRAS      |
| A_23_P201459 | 2.14E-03 | 8.63E-04 | -2.03 | IFI6      |
| A_23_P157478 | 6.90E-05 | 1.28E-05 | -2.98 | ATP6V1H   |
| A_23_P93180  | 3.29E-03 | 1.43E-03 | 2.02  | HIST1H2BC |
| A_23_P134925 | 1.33E-05 | 1.07E-06 | -2.45 | BNIP3L    |
| A_23_P56938  | 2.16E-02 | 1.24E-02 | 2.57  | REL       |

|              |          |          |       |        |
|--------------|----------|----------|-------|--------|
| A_23_P501538 | 7.30E-06 | 3.22E-07 | 1.97  | HOXA3  |
| A_23_P69493  | 3.88E-06 | 1.11E-07 | -3.42 | RHOA   |
| A_24_P39759  | 1.41E-05 | 1.17E-06 | 1.64  | RNF135 |
| A_24_P277456 | 1.02E-04 | 2.17E-05 | -3.50 | UBE2K  |
| A_24_P935437 | 4.77E-05 | 7.81E-06 | 1.92  | MBP    |
| A_23_P2097   | 5.73E-04 | 1.84E-04 | -1.79 | TRIM68 |
| A_23_P256561 | 2.05E-04 | 5.13E-05 | 1.64  | TLR6   |
| A_23_P207940 | 5.57E-05 | 9.61E-06 | -1.79 | PTPN2  |

In bold are highlighted candidate genes already known to contribute to ALS susceptibility.

\*Gene expression fold-changes are given on a linear scale.

**Supplementary Table 5. Neuroinflammatory genes differentially expressed in SALS1 and SALS2.**

| Probe ID     | p Value (Corr) | p Value  | Fold Change<br>(SALS1/CTRL <sup>+</sup> )* | Fold Change<br>(SALS2/CTRL <sup>+</sup> )* | GENE_SYMBOL |
|--------------|----------------|----------|--------------------------------------------|--------------------------------------------|-------------|
| A_23_P89249  | 7.67E-04       | 2.59E-04 | 1.99                                       | 1.6245594                                  | ERBB2       |
| A_23_P309739 | 2.75E-02       | 1.61E-02 | -1.46                                      | -1.5552287                                 | ESR1        |
| A_23_P70095  | 1.39E-02       | 7.41E-03 | 1.69                                       | 2.1040883                                  | CD74        |
| A_23_P101992 | 3.31E-02       | 1.99E-02 | 2.44                                       | 2.9789243                                  | MARCO       |
| A_23_P103361 | 1.17E-02       | 6.08E-03 | -1.48                                      | -1.6601439                                 | LCK         |
| A_24_P943283 | 1.43E-03       | 5.37E-04 | -1.64                                      | -2.3417015                                 | DENND1B     |
| A_24_P254079 | 6.81E-03       | 3.31E-03 | 2.10                                       | 2.963726                                   | ICAM5       |
| A_23_P81912  | 5.03E-06       | 1.64E-07 | 2.33                                       | -2.1507022                                 | TUBB        |
| A_23_P151294 | 1.01E-06       | 3.77E-09 | -1.80                                      | 1.9352487                                  | IFNG        |
| A_23_P140916 | 4.24E-06       | 1.30E-07 | 2.17                                       | -2.0372417                                 | GLG1        |
| A_23_P29994  | 8.12E-06       | 4.08E-07 | 2.08                                       | -2.1523817                                 | RBPJ        |
| A_23_P42935  | 1.37E-02       | 7.30E-03 | -1.32                                      | -1.4475981                                 | BRAF        |
| A_32_P120977 | 8.16E-06       | 4.15E-07 | 1.64                                       | -1.6825967                                 | PRELID1     |
| A_23_P121253 | 1.57E-02       | 8.57E-03 | -1.40                                      | -1.5319853                                 | TNFSF10     |
| A_23_P113716 | 7.07E-06       | 2.91E-07 | 2.11                                       | -2.3847184                                 | HLA-C       |
| A_23_P130815 | 3.40E-03       | 1.49E-03 | -1.84                                      | -1.9945887                                 | KIR2DS2     |
| A_24_P276853 | 1.29E-03       | 4.79E-04 | 2.01                                       | 2.162412                                   | GON4L       |
| A_24_P252078 | 1.81E-02       | 1.01E-02 | 1.63                                       | 1.7563841                                  | BTN3A2      |
| A_24_P766716 | 2.55E-02       | 1.48E-02 | 1.72                                       | 1.8776253                                  | CMKLR1      |
| A_23_P207582 | 7.09E-06       | 2.99E-07 | -3.23                                      | 3.2294095                                  | CCL16       |
| A_24_P103469 | 4.54E-03       | 2.08E-03 | 1.98                                       | 2.8276353                                  | LST1        |
| A_32_P232865 | 6.76E-03       | 3.28E-03 | 3.14                                       | 3.7766464                                  | BCR         |
| A_23_P25644  | 6.68E-07       | 8.25E-10 | 1.69                                       | -2.291853                                  | PCID2       |
| A_23_P79161  | 3.88E-06       | 1.11E-07 | 1.54                                       | -1.6402473                                 | PRELID1     |
| A_23_P56195  | 6.68E-07       | 1.26E-09 | 1.58                                       | -2.210804                                  | UBA52       |
| A_23_P203053 | 2.04E-03       | 8.20E-04 | 1.70                                       | 2.2072346                                  | NCAM1       |
| A_23_P30122  | 4.59E-06       | 1.48E-07 | -1.83                                      | 2.1090114                                  | IL2         |
| A_23_P169331 | 1.37E-02       | 7.28E-03 | 1.78                                       | 1.5586059                                  | TRAF2       |
| A_24_P222655 | 1.03E-02       | 5.29E-03 | 2.90                                       | 2.3396752                                  | C1QA        |
| A_32_P217709 | 4.24E-06       | 1.29E-07 | 2.37                                       | -2.2239976                                 | RAC1        |
| A_23_P38346  | 8.68E-06       | 4.99E-07 | 1.98                                       | -2.0749657                                 | DHX58       |
| A_23_P31921  | 4.35E-03       | 1.98E-03 | 2.69                                       | 3.2652416                                  | ASS1        |
| A_23_P142380 | 6.68E-07       | 9.44E-10 | 1.79                                       | -1.8057177                                 | AKAP8       |
| A_23_P136325 | 6.22E-03       | 2.98E-03 | 1.62                                       | 2.1003823                                  | WIPF2       |
| A_32_P67533  | 6.00E-06       | 2.15E-07 | 1.40                                       | -1.482858                                  | L3MBTL3     |
| A_23_P71268  | 1.55E-03       | 5.97E-04 | 2.25                                       | 3.2261822                                  | AZGP1       |
| A_24_P184031 | 8.21E-06       | 4.26E-07 | 2.08                                       | -2.0806754                                 | PHPT1       |
| A_23_P359091 | 5.39E-03       | 2.53E-03 | 1.73                                       | 1.6670423                                  | SMAD3       |
| A_23_P59005  | 1.64E-06       | 1.41E-08 | 2.05                                       | -2.0266466                                 | TAP1        |
| A_24_P337592 | 9.84E-03       | 5.01E-03 | 1.61                                       | 1.8112911                                  | BTN2A2      |
| A_23_P115460 | 1.01E-06       | 4.08E-09 | 1.75                                       | -1.9200194                                 | RPL22       |
| A_32_P9700   | 2.37E-06       | 3.82E-08 | 1.94                                       | -2.1930177                                 | PSMC1       |
| A_23_P171249 | 1.67E-06       | 1.69E-08 | 1.98                                       | -1.8409251                                 | IGBP1       |
| A_23_P17560  | 6.07E-03       | 2.90E-03 | 3.32                                       | 6.288712                                   | KIF3B       |
| A_24_P346277 | 7.30E-06       | 3.15E-07 | 1.93                                       | -2.0923793                                 | SRF         |
| A_24_P8892   | 4.59E-06       | 1.46E-07 | 1.75                                       | -1.7740107                                 | HDAC4       |
| A_23_P119562 | 1.15E-02       | 5.97E-03 | 2.46                                       | 1.9826583                                  | CFD         |

|              |          |          |       |            |          |
|--------------|----------|----------|-------|------------|----------|
| A_23_P151610 | 1.26E-06 | 7.59E-09 | 2.42  | -1.9032911 | PSME1    |
| A_23_P142631 | 1.60E-06 | 1.33E-08 | 1.92  | -2.3611374 | FKBP1B   |
| A_24_P402222 | 2.90E-02 | 1.72E-02 | 2.53  | 2.2931263  | HLA-DRB3 |
| A_24_P353794 | 4.32E-04 | 1.31E-04 | 2.05  | 1.7299206  | GALNT2   |
| A_23_P128744 | 2.73E-02 | 1.60E-02 | -2.15 | -2.1131637 | BDKRB1   |
| A_23_P33752  | 7.09E-06 | 2.98E-07 | 2.12  | -2.0164661 | SLC25A6  |
| A_24_P682285 | 6.08E-05 | 1.08E-05 | 3.53  | 1.8744959  | HSPA1A   |
| A_24_P226554 | 3.53E-06 | 8.86E-08 | 2.64  | -2.288506  | ACTB     |
| A_23_P211985 | 8.64E-03 | 4.33E-03 | 1.87  | 2.0685003  | SNRK     |
| A_24_P82200  | 1.24E-02 | 6.50E-03 | 1.59  | 1.8813595  | MEIS2    |
| A_24_P472055 | 4.59E-03 | 2.11E-03 | -2.14 | -2.748359  | RNF125   |
| A_23_P166371 | 8.92E-03 | 4.48E-03 | -1.99 | -2.1929023 | VPREB3   |
| A_23_P71624  | 1.97E-02 | 1.11E-02 | -2.18 | -1.8598564 | PAX5     |
| A_23_P348636 | 1.25E-02 | 6.55E-03 | 1.91  | 1.7638527  | FOXJ1    |
| A_23_P38959  | 8.64E-03 | 4.33E-03 | 1.66  | 2.119077   | VAV1     |
| A_23_P48088  | 3.02E-04 | 8.42E-05 | -1.64 | -2.5189831 | CD27     |
| A_23_P133245 | 7.74E-06 | 3.70E-07 | 1.99  | -2.1024985 | IK       |
| A_24_P216165 | 2.09E-04 | 5.23E-05 | -2.49 | -4.7468586 | CEBPA    |
| A_32_P186921 | 3.29E-05 | 4.59E-06 | -1.42 | -1.9837334 | ZNF616   |
| A_23_P337242 | 1.26E-06 | 8.32E-09 | -1.75 | 1.9213755  | TGFBR2   |
| A_24_P94916  | 1.78E-02 | 9.88E-03 | 1.88  | 1.896965   | LST1     |
| A_23_P31323  | 2.70E-06 | 4.61E-08 | 2.60  | -2.2473917 | ACTB     |
| A_23_P413641 | 6.00E-06 | 2.20E-07 | 1.78  | -1.890054  | PREX1    |
| A_23_P158239 | 2.34E-02 | 1.35E-02 | 1.75  | 1.8354497  | SHMT2    |
| A_23_P501538 | 7.30E-06 | 3.22E-07 | -2.04 | 1.9682595  | HOXA3    |

---

\*Gene expression fold-changes are given on a linear scale.

**Supplementary Table 6. List of genes included in the SALS1-related PPI network.**

| Degree | Node     | Gene name                                                                                                      |
|--------|----------|----------------------------------------------------------------------------------------------------------------|
| 157    | UBC      | ubiquitin C                                                                                                    |
| 84     | TP53     | tumor protein p53                                                                                              |
| 79     | AKT1     | v-akt murine thymoma viral oncogene homolog 1                                                                  |
| 66     | MYC      | v-myc myelocytomatosis viral oncogene homolog (avian)                                                          |
| 64     | CCND1    | cyclin D1                                                                                                      |
| 64     | STAT3    | signal transducer and activator of transcription 3 (acute-phase response factor)                               |
| 63     | HSP90AA1 | heat shock protein 90kDa alpha (cytosolic), class A member 1                                                   |
| 62     | JUN      | jun proto-oncogene                                                                                             |
| 58     | EGFR     | epidermal growth factor receptor                                                                               |
| 56     | FOS      | FBJ murine osteosarcoma viral oncogene homolog                                                                 |
| 56     | MAPK14   | mitogen-activated protein kinase 14                                                                            |
| 54     | RAC1     | ras-related C3 botulinum toxin substrate 1 (rho family, small GTP binding protein Rac1)                        |
| 49     | RHOA     | ras homolog family member A                                                                                    |
| 47     | MAPK1    | mitogen-activated protein kinase 1                                                                             |
| 47     | PIK3R1   | phosphoinositide-3-kinase, regulatory subunit 1 (alpha)                                                        |
| 46     | MAPK8    | mitogen-activated protein kinase 8                                                                             |
| 45     | NFKB1    | nuclear factor of kappa light polypeptide gene enhancer in B-cells 1                                           |
| 45     | CTNNB1   | catenin (cadherin-associated protein), beta 1, 88kDa                                                           |
| 45     | PTPN11   | protein tyrosine phosphatase, non-receptor type 11                                                             |
| 44     | FYN      | FYN oncogene related to SRC, FGR, YES                                                                          |
| 44     | STAT1    | signal transducer and activator of transcription 1, 91kDa                                                      |
| 43     | HRAS     | v-Ha-ras Harvey rat sarcoma viral oncogene homolog                                                             |
| 43     | UBB      | ubiquitin B                                                                                                    |
| 42     | EP300    | E1A binding protein p300                                                                                       |
| 41     | CREBBP   | CREB binding protein                                                                                           |
| 40     | ERBB2    | v-erb-b2 erythroblastic leukemia viral oncogene homolog 2, neuro/glioblastoma derived oncogene homolog (avian) |
| 40     | MTOR     | mechanistic target of rapamycin (serine/threonine kinase)                                                      |
| 39     | ABL1     | c-abl oncogene 1, non-receptor tyrosine kinase                                                                 |
| 39     | AR       | androgen receptor                                                                                              |
| 39     | RELA     | v-rel reticuloendotheliosis viral oncogene homolog A (avian)                                                   |
| 39     | VEGFA    | vascular endothelial growth factor A                                                                           |
| 39     | UBA52    | ubiquitin A-52 residue ribosomal protein fusion product 1                                                      |
| 38     | CDH1     | cadherin 1, type 1, E-cadherin (epithelial)                                                                    |
| 38     | GRB2     | growth factor receptor-bound protein 2                                                                         |
| 38     | HIF1A    | hypoxia inducible factor 1, alpha subunit (basic helix-loop-helix transcription factor)                        |
| 36     | EGR1     | early growth response 1                                                                                        |
| 36     | MAPK3    | mitogen-activated protein kinase 3                                                                             |
| 35     | RAC3     | ras-related C3 botulinum toxin substrate 3 (rho family, small GTP binding protein Rac3)                        |
| 34     | FOXO3    | forkhead box O3                                                                                                |
| 34     | HSPA8    | heat shock 70kDa protein 8                                                                                     |
| 34     | CDKN1B   | cyclin-dependent kinase inhibitor 1B (p27, Kip1)                                                               |
| 34     | SMAD3    | SMAD family member 3                                                                                           |
| 33     | JAK2     | Janus kinase 2                                                                                                 |
| 33     | NRAS     | neuroblastoma RAS viral (v-ras) oncogene homolog                                                               |
| 33     | CDC42    | cell division cycle 42 (GTP binding protein, 25kDa)                                                            |
| 33     | PTK2     | PTK2 protein tyrosine kinase 2                                                                                 |
| 32     | NOTCH1   | notch 1                                                                                                        |
| 32     | BCL2L1   | BCL2-like 1                                                                                                    |
| 30     | KRAS     | v-Ki-ras2 Kirsten rat sarcoma viral oncogene homolog                                                           |
| 30     | LYN      | v-yes-1 Yamaguchi sarcoma viral related oncogene homolog                                                       |
| 30     | HSP90AB1 | heat shock protein 90kDa alpha (cytosolic), class B member 1                                                   |
| 30     | JAK1     | Janus kinase 1                                                                                                 |
| 29     | CREB1    | cAMP responsive element binding protein 1                                                                      |
| 29     | CD44     | CD44 molecule (Indian blood group)                                                                             |
| 28     | PLK1     | polo-like kinase 1                                                                                             |
| 28     | HDAC9    | histone deacetylase 9                                                                                          |
| 27     | KIT      | v-kit Hardy-Zuckerman 4 feline sarcoma viral oncogene homolog                                                  |
| 27     | CXCL12   | chemokine (C-X-C motif) ligand 12                                                                              |
| 27     | APP      | amyloid beta (A4) precursor protein                                                                            |
| 27     | ACTB     | actin, beta                                                                                                    |
| 26     | MAPK11   | mitogen-activated protein kinase 11                                                                            |
| 25     | EZR      | ezrin                                                                                                          |
| 25     | NOS3     | nitric oxide synthase 3 (endothelial cell)                                                                     |
| 24     | GAPDH    | glyceraldehyde-3-phosphate dehydrogenase                                                                       |
| 24     | SUMO1    | SMT3 suppressor of mif two 3 homolog 1 (S. cerevisiae)                                                         |
| 24     | TLR4     | toll-like receptor 4                                                                                           |
| 24     | HLA-DRB1 | major histocompatibility complex, class II, DR beta 1                                                          |
| 23     | IKBKB    | inhibitor of kappa light polypeptide gene enhancer in B-cells, kinase beta                                     |
| 22     | F2       | coagulation factor II (thrombin)                                                                               |
| 21     | JAK3     | Janus kinase 3                                                                                                 |
| 21     | PML      | promyelocytic leukemia                                                                                         |
| 20     | MAPK10   | mitogen-activated protein kinase 10                                                                            |

|    |         |                                                                                                   |
|----|---------|---------------------------------------------------------------------------------------------------|
| 20 | ALB     | albumin                                                                                           |
| 19 | BIRC5   | baculoviral IAP repeat containing 5                                                               |
| 19 | BCR     | breakpoint cluster region                                                                         |
| 19 | CDK4    | cyclin-dependent kinase 4                                                                         |
| 19 | PSMD4   | proteasome (prosome, macropain) 26S subunit, non-ATPase, 4                                        |
| 19 | NCAM1   | neural cell adhesion molecule 1                                                                   |
| 18 | PSMC5   | proteasome (prosome, macropain) 26S subunit, ATPase, 5                                            |
| 17 | INSR    | insulin receptor                                                                                  |
| 17 | CCND3   | cyclin D3                                                                                         |
| 17 | SMARCA4 | SWI/SNF related, matrix associated, actin dependent regulator of chromatin, subfamily a, member 4 |
| 17 | TRAF2   | TNF receptor-associated factor 2                                                                  |
| 17 | HLA-A   | major histocompatibility complex, class I, A                                                      |
| 16 | PSMD13  | proteasome (prosome, macropain) 26S subunit, non-ATPase, 13                                       |
| 16 | PSMD11  | proteasome (prosome, macropain) 26S subunit, non-ATPase, 11                                       |
| 16 | PSMD9   | proteasome (prosome, macropain) 26S subunit, non-ATPase, 9                                        |
| 16 | PSMD3   | proteasome (prosome, macropain) 26S subunit, non-ATPase, 3                                        |
| 16 | ACTN1   | actinin, alpha 1                                                                                  |
| 16 | PSMC3   | proteasome (prosome, macropain) 26S subunit, ATPase, 3                                            |
| 16 | TSPO    | translocator protein (18kDa)                                                                      |
| 16 | DNM2    | dynamitin 2                                                                                       |
| 16 | PSMC1   | proteasome (prosome, macropain) 26S subunit, ATPase, 1                                            |
| 16 | PSMF1   | proteasome (prosome, macropain) inhibitor subunit 1 (PI31)                                        |
| 16 | PSMD1   | proteasome (prosome, macropain) 26S subunit, non-ATPase, 1                                        |
| 15 | CLU     | clusterin                                                                                         |
| 15 | HLA-C   | major histocompatibility complex, class I, C                                                      |
| 15 | MYH14   | myosin, heavy chain 14, non-muscle                                                                |
| 15 | HLA-B   | major histocompatibility complex, class I, B                                                      |
| 14 | SQSTM1  | sequestosome 1                                                                                    |
| 14 | BECN1   | beclin 1, autophagy related                                                                       |
| 14 | OASL    | 2'-5'-oligoadenylate synthetase-like                                                              |
| 14 | OAS1    | 2'-5'-oligoadenylate synthetase 1, 40/46kDa                                                       |
| 13 | ANGPT2  | angiopoietin 2                                                                                    |
| 13 | TYK2    | tyrosine kinase 2                                                                                 |
| 13 | BCL6    | B-cell CLL/lymphoma 6                                                                             |
| 13 | NFATC1  | nuclear factor of activated T-cells, cytoplasmic, calcineurin-dependent 1                         |
| 13 | DECR1   | 2,4-dienoyl CoA reductase 1, mitochondrial                                                        |
| 13 | PARK2   | parkinson protein 2, E3 ubiquitin protein ligase (parkin)                                         |
| 12 | HSPA5   | heat shock 70kDa protein 5 (glucose-regulated protein, 78kDa)                                     |
| 12 | MSN     | moesin                                                                                            |
| 12 | ARNT    | aryl hydrocarbon receptor nuclear translocator                                                    |
| 12 | CDC37   | cell division cycle 37 homolog (S. cerevisiae)                                                    |
| 12 | NTRK1   | neurotrophic tyrosine kinase, receptor, type 1                                                    |
| 12 | DDX41   | DEAD (Asp-Glu-Ala-Asp) box polypeptide 41                                                         |
| 12 | PRDM10  | PR domain containing 10                                                                           |
| 11 | CD80    | CD80 molecule                                                                                     |
| 11 | TGFBR2  | transforming growth factor, beta receptor II (70/80kDa)                                           |
| 11 | BRAF    | v-raf murine sarcoma viral oncogene homolog B1                                                    |
| 11 | CYLD    | cyldromatosis (turban tumor syndrome)                                                             |
| 10 | ANXA2   | annexin A2                                                                                        |
| 10 | SLC3A2  | solute carrier family 3 (activators of dibasic and neutral amino acid transport), member 2        |
| 10 | PDIA3   | protein disulfide isomerase family A, member 3                                                    |
| 10 | TSC1    | tuberous sclerosis 1                                                                              |
| 10 | AP2M1   | adaptor-related protein complex 2, mu 1 subunit                                                   |
| 10 | NCF2    | neutrophil cytosolic factor 2                                                                     |

---

**Supplementary Table 7. List of genes included in the SALS2-related PPI network.**

| Degree | Node     | Gene name                                                                                                      |
|--------|----------|----------------------------------------------------------------------------------------------------------------|
| 326    | UBC      | ubiquitin C                                                                                                    |
| 131    | AKT1     | v-akt murine thymoma viral oncogene homolog 1                                                                  |
| 130    | TP53     | tumor protein p53                                                                                              |
| 105    | EGFR     | epidermal growth factor receptor                                                                               |
| 99     | RAC1     | ras-related C3 botulinum toxin substrate 1 (rho family, small GTP binding protein Rac1)                        |
| 98     | STAT3    | signal transducer and activator of transcription 3 (acute-phase response factor)                               |
| 97     | MAPK1    | mitogen-activated protein kinase 1                                                                             |
| 95     | HSP90AA1 | heat shock protein 90kDa alpha (cytosolic), class A member 1                                                   |
| 90     | JUN      | jun proto-oncogene                                                                                             |
| 89     | MYC      | v-myc myelocytomatosis viral oncogene homolog (avian)                                                          |
| 88     | CCND1    | cyclin D1                                                                                                      |
| 87     | UBB      | ubiquitin B                                                                                                    |
| 86     | RPS27A   | ribosomal protein S27a                                                                                         |
| 81     | HRAS     | v-Ha-ras Harvey rat sarcoma viral oncogene homolog                                                             |
| 81     | UBA52    | ubiquitin A-52 residue ribosomal protein fusion product 1                                                      |
| 79     | MAPK14   | mitogen-activated protein kinase 14                                                                            |
| 78     | RHOA     | ras homolog family member A                                                                                    |
| 76     | CTNNB1   | catenin (cadherin-associated protein), beta 1, 88kDa                                                           |
| 76     | MAPK8    | mitogen-activated protein kinase 8                                                                             |
| 75     | PIK3R1   | phosphoinositide-3-kinase, regulatory subunit 1 (alpha)                                                        |
| 75     | MAPK3    | mitogen-activated protein kinase 3                                                                             |
| 74     | PTPN11   | protein tyrosine phosphatase, non-receptor type 11                                                             |
| 74     | FOS      | FBJ murine osteosarcoma viral oncogene homolog                                                                 |
| 72     | NFKB1    | nuclear factor of kappa light polypeptide gene enhancer in B-cells 1                                           |
| 71     | GRB2     | growth factor receptor-bound protein 2                                                                         |
| 70     | STAT1    | signal transducer and activator of transcription 1, 91kDa                                                      |
| 69     | ABL1     | c-abl oncogene 1, non-receptor tyrosine kinase                                                                 |
| 69     | FYN      | FYN oncogene related to SRC, FGR, YES                                                                          |
| 68     | RELA     | v-rel reticuloendotheliosis viral oncogene homolog A (avian)                                                   |
| 68     | JAK2     | Janus kinase 2                                                                                                 |
| 68     | CREBBP   | CREB binding protein                                                                                           |
| 67     | CDC42    | cell division cycle 42 (GTP binding protein, 25kDa)                                                            |
| 67     | VEGFA    | vascular endothelial growth factor A                                                                           |
| 66     | EP300    | E1A binding protein p300                                                                                       |
| 66     | SOS1     | son of sevenless homolog 1 (Drosophila)                                                                        |
| 65     | HSPA8    | heat shock 70kDa protein 8                                                                                     |
| 64     | SHC1     | SHC (Src homology 2 domain containing) transforming protein 1                                                  |
| 62     | AGT      | angiotensinogen (serpin peptidase inhibitor, clade A, member 8)                                                |
| 61     | PTK2     | PTK2 protein tyrosine kinase 2                                                                                 |
| 61     | HSPB1    | heat shock 27kDa protein 1                                                                                     |
| 60     | CREB1    | cAMP responsive element binding protein 1                                                                      |
| 59     | PLCG1    | phospholipase C, gamma 1                                                                                       |
| 57     | AR       | androgen receptor                                                                                              |
| 56     | RAC3     | ras-related C3 botulinum toxin substrate 3 (rho family, small GTP binding protein Rac3)                        |
| 56     | CDH1     | cadherin 1, type 1, E-cadherin (epithelial)                                                                    |
| 56     | EGR1     | early growth response 1                                                                                        |
| 56     | CDKN1B   | cyclin-dependent kinase inhibitor 1B (p27, Kip1)                                                               |
| 55     | NRAS     | neuroblastoma RAS viral (v-ras) oncogene homolog                                                               |
| 55     | PRKCA    | protein kinase C, alpha                                                                                        |
| 55     | RAF1     | v-raf-1 murine leukemia viral oncogene homolog 1                                                               |
| 55     | HIF1A    | hypoxia inducible factor 1, alpha subunit (basic helix-loop-helix transcription factor)                        |
| 54     | APP      | amyloid beta (A4) precursor protein                                                                            |
| 53     | JAK1     | Janus kinase 1                                                                                                 |
| 53     | LYN      | v-yes-1 Yamaguchi sarcoma viral related oncogene homolog                                                       |
| 52     | ACTB     | actin, beta                                                                                                    |
| 52     | NOTCH1   | notch 1                                                                                                        |
| 51     | BTRC     | beta-transducin repeat containing E3 ubiquitin protein ligase                                                  |
| 51     | SMAD3    | SMAD family member 3                                                                                           |
| 51     | IGF1     | insulin-like growth factor 1 (somatomedin C)                                                                   |
| 51     | PRKCD    | protein kinase C, delta                                                                                        |
| 50     | SKP1     | S-phase kinase-associated protein 1                                                                            |
| 50     | MTOR     | mechanistic target of rapamycin (serine/threonine kinase)                                                      |
| 50     | NOS3     | nitric oxide synthase 3 (endothelial cell)                                                                     |
| 49     | CUL1     | cullin 1                                                                                                       |
| 48     | ERBB2    | v-erb-b2 erythroblastic leukemia viral oncogene homolog 2, neuro/glioblastoma derived oncogene homolog (avian) |
| 48     | KIT      | v-kit Hardy-Zuckerman 4 feline sarcoma viral oncogene homolog                                                  |
| 47     | CAV1     | caveolin 1, caveolae protein, 22kDa                                                                            |
| 47     | PRKACA   | protein kinase, cAMP-dependent, catalytic, alpha                                                               |
| 45     | IGF1R    | insulin-like growth factor 1 receptor                                                                          |
| 45     | PLK1     | polo-like kinase 1                                                                                             |
| 44     | CXCL12   | chemokine (C-X-C motif) ligand 12                                                                              |
| 44     | HSP90AB1 | heat shock protein 90kDa alpha (cytosolic), class B member 1                                                   |

|    |         |                                                                                                   |
|----|---------|---------------------------------------------------------------------------------------------------|
| 44 | PXN     | paxillin                                                                                          |
| 43 | NFKBIA  | nuclear factor of kappa light polypeptide gene enhancer in B-cells inhibitor, alpha               |
| 43 | PDGFRB  | platelet-derived growth factor receptor, beta polypeptide                                         |
| 42 | BCL2L1  | BCL2-like 1                                                                                       |
| 42 | KRAS    | v-Ki-ras2 Kirsten rat sarcoma viral oncogene homolog                                              |
| 41 | PDGFB   | platelet-derived growth factor beta polypeptide                                                   |
| 41 | SMAD4   | SMAD family member 4                                                                              |
| 41 | MET     | met proto-oncogene (hepatocyte growth factor receptor)                                            |
| 40 | YES1    | v-yes-1 Yamaguchi sarcoma viral oncogene homolog 1                                                |
| 40 | PSMA4   | proteasome (prosome, macropain) subunit, alpha type, 4                                            |
| 40 | PSMB1   | proteasome (prosome, macropain) subunit, beta type, 1                                             |
| 40 | PSMC2   | proteasome (prosome, macropain) 26S subunit, ATPase, 2                                            |
| 39 | RAC2    | ras-related C3 botulinum toxin substrate 2 (rho family, small GTP binding protein Rac2)           |
| 39 | PSMD10  | proteasome (prosome, macropain) 26S subunit, non-ATPase, 10                                       |
| 39 | PSMD14  | proteasome (prosome, macropain) 26S subunit, non-ATPase, 14                                       |
| 39 | PSMD3   | proteasome (prosome, macropain) 26S subunit, non-ATPase, 3                                        |
| 39 | MAPK11  | mitogen-activated protein kinase 11                                                               |
| 39 | PSMC1   | proteasome (prosome, macropain) 26S subunit, ATPase, 1                                            |
| 38 | PSMD12  | proteasome (prosome, macropain) 26S subunit, non-ATPase, 12                                       |
| 38 | PSMD6   | proteasome (prosome, macropain) 26S subunit, non-ATPase, 6                                        |
| 38 | PSMD1   | proteasome (prosome, macropain) 26S subunit, non-ATPase, 1                                        |
| 38 | PSMF1   | proteasome (prosome, macropain) inhibitor subunit 1 (PI31)                                        |
| 38 | F2      | coagulation factor II (thrombin)                                                                  |
| 38 | PSMA5   | proteasome (prosome, macropain) subunit, alpha type, 5                                            |
| 38 | PSMA6   | proteasome (prosome, macropain) subunit, alpha type, 6                                            |
| 38 | SMAD2   | SMAD family member 2                                                                              |
| 38 | PSMA1   | proteasome (prosome, macropain) subunit, alpha type, 1                                            |
| 38 | PSMB4   | proteasome (prosome, macropain) subunit, beta type, 4                                             |
| 38 | PSMB5   | proteasome (prosome, macropain) subunit, beta type, 5                                             |
| 38 | PSMB2   | proteasome (prosome, macropain) subunit, beta type, 2                                             |
| 38 | PSMB3   | proteasome (prosome, macropain) subunit, beta type, 3                                             |
| 38 | PSMC6   | proteasome (prosome, macropain) 26S subunit, ATPase, 6                                            |
| 37 | TLR4    | toll-like receptor 4                                                                              |
| 37 | PTK2B   | PTK2B protein tyrosine kinase 2 beta                                                              |
| 37 | PSME3   | proteasome (prosome, macropain) activator subunit 3 (PA28 gamma; Ki)                              |
| 37 | PSMB6   | proteasome (prosome, macropain) subunit, beta type, 6                                             |
| 37 | PSMB7   | proteasome (prosome, macropain) subunit, beta type, 7                                             |
| 36 | ITGB1   | integrin, beta 1 (fibronectin receptor, beta polypeptide, antigen CD29 includes MDF2, MSK12)      |
| 36 | PSMD9   | proteasome (prosome, macropain) 26S subunit, non-ATPase, 9                                        |
| 36 | PSME4   | proteasome (prosome, macropain) activator subunit 4                                               |
| 36 | PRKCB   | protein kinase C, beta                                                                            |
| 35 | CASP3   | caspase 3, apoptosis-related cysteine peptidase                                                   |
| 35 | PRKACB  | protein kinase, cAMP-dependent, catalytic, beta                                                   |
| 35 | LNPEP   | leucyl/cystinyl aminopeptidase                                                                    |
| 35 | PPARA   | peroxisome proliferator-activated receptor alpha                                                  |
| 34 | YWHAZ   | tyrosine 3-monooxygenase/tryptophan 5-monooxygenase activation protein, zeta polypeptide          |
| 34 | JAK3    | Janus kinase 3                                                                                    |
| 34 | PRKCZ   | protein kinase C, zeta                                                                            |
| 34 | SUMO1   | SMT3 suppressor of mif two 3 homolog 1 (S. cerevisiae)                                            |
| 33 | GAPDH   | glyceraldehyde-3-phosphate dehydrogenase                                                          |
| 33 | GAB2    | GRB2-associated binding protein 2                                                                 |
| 33 | MMP2    | matrix metalloproteinase 2 (gelatinase A, 72kDa gelatinase, 72kDa type IV collagenase)            |
| 32 | HDAC9   | histone deacetylase 9                                                                             |
| 31 | INSR    | insulin receptor                                                                                  |
| 31 | AKT2    | v-akt murine thymoma viral oncogene homolog 2                                                     |
| 30 | ARRB2   | arrestin, beta 2                                                                                  |
| 30 | HSPA4   | heat shock 70kDa protein 4                                                                        |
| 30 | PLCB1   | phospholipase C, beta 1 (phosphoinositide-specific)                                               |
| 29 | B2M     | beta-2-microglobulin                                                                              |
| 29 | FGR     | Gardner-Rasheed feline sarcoma viral (v-fgr) oncogene homolog                                     |
| 29 | SMARCA4 | SWI/SNF related, matrix associated, actin dependent regulator of chromatin, subfamily a, member 4 |
| 28 | BCR     | breakpoint cluster region                                                                         |
| 27 | TRAF2   | TNF receptor-associated factor 2                                                                  |
| 27 | CEBPB   | CCAAT/enhancer binding protein (C/EBP), beta                                                      |
| 27 | PML     | promyelocytic leukemia                                                                            |
| 27 | CDK4    | cyclin-dependent kinase 4                                                                         |
| 27 | MAPK9   | mitogen-activated protein kinase 9                                                                |
| 26 | HLA-C   | major histocompatibility complex, class I, C                                                      |
| 26 | VAV2    | vav 2 guanine nucleotide exchange factor                                                          |
| 26 | PRKCE   | protein kinase C, epsilon                                                                         |
| 25 | A2M     | alpha-2-macroglobulin                                                                             |
| 25 | PDGFRA  | platelet-derived growth factor receptor, alpha polypeptide                                        |
| 25 | NCAM1   | neural cell adhesion molecule 1                                                                   |
| 25 | ALB     | albumin                                                                                           |

|    |          |                                                                             |
|----|----------|-----------------------------------------------------------------------------|
| 24 | MYD88    | myeloid differentiation primary response 88                                 |
| 24 | KITLG    | KIT ligand                                                                  |
| 24 | SH3GL2   | SH3-domain GRB2-like 2                                                      |
| 24 | PLD2     | phospholipase D2                                                            |
| 24 | BAX      | BCL2-associated X protein                                                   |
| 24 | DNM2     | dynamins 2                                                                  |
| 24 | MAP3K5   | mitogen-activated protein kinase kinase kinase 5                            |
| 23 | HMGB1    | high mobility group box 1                                                   |
| 23 | HSPD1    | heat shock 60kDa protein 1 (chaperonin)                                     |
| 23 | PSMA2    | proteasome (prosome, macropain) subunit, alpha type, 2                      |
| 23 | PTAFR    | platelet-activating factor receptor                                         |
| 23 | RET      | ret proto-oncogene                                                          |
| 23 | ABI1     | abl-interactor 1                                                            |
| 22 | RPS6KA3  | ribosomal protein S6 kinase, 90kDa, polypeptide 3                           |
| 22 | ITCH     | itchy E3 ubiquitin protein ligase                                           |
| 22 | CAMK2D   | calcium/calmodulin-dependent protein kinase II delta                        |
| 21 | IGF2     | insulin-like growth factor 2 (somatomedin A)                                |
| 21 | SPTBN2   | spectrin, beta, non-erythrocytic 2                                          |
| 21 | TYK2     | tyrosine kinase 2                                                           |
| 21 | ARHGEF7  | Rho guanine nucleotide exchange factor (GEF) 7                              |
| 21 | IFNB1    | interferon, beta 1, fibroblast                                              |
| 21 | CAMK2G   | calcium/calmodulin-dependent protein kinase II gamma                        |
| 21 | SNCA     | synuclein, alpha (non A4 component of amyloid precursor)                    |
| 21 | DEC1     | 2,4-dienoyl CoA reductase 1, mitochondrial                                  |
| 21 | HSPA5    | heat shock 70kDa protein 5 (glucose-regulated protein, 78kDa)               |
| 21 | MAPK13   | mitogen-activated protein kinase 13                                         |
| 21 | HSP90B1  | heat shock protein 90kDa beta (Grp94), member 1                             |
| 20 | MAP2K4   | mitogen-activated protein kinase kinase 4                                   |
| 20 | MITF     | microphthalmia-associated transcription factor                              |
| 20 | SOS2     | son of sevenless homolog 2 (Drosophila)                                     |
| 20 | ADRM1    | adhesion regulating molecule 1                                              |
| 20 | CALM1    | calmodulin 1 (phosphorylase kinase, delta)                                  |
| 20 | CD74     | CD74 molecule, major histocompatibility complex, class II invariant chain   |
| 20 | FGFR2    | fibroblast growth factor receptor 2                                         |
| 20 | PSEN1    | presenilin 1                                                                |
| 20 | TSPO     | translocator protein (18kDa)                                                |
| 20 | DCTN1    | dynactin 1                                                                  |
| 20 | CSF1R    | colony stimulating factor 1 receptor                                        |
| 20 | SUMO2    | SMT3 suppressor of mif two 3 homolog 2 (S. cerevisiae)                      |
| 19 | RPS6     | ribosomal protein S6                                                        |
| 19 | NFE2L2   | nuclear factor (erythroid-derived 2)-like 2                                 |
| 19 | APOA1    | apolipoprotein A-I                                                          |
| 19 | IFIT1    | interferon-induced protein with tetratricopeptide repeats 1                 |
| 19 | RPS6KA5  | ribosomal protein S6 kinase, 90kDa, polypeptide 5                           |
| 19 | CANX     | calnexin                                                                    |
| 19 | RIPK1    | receptor (TNFRSF)-interacting serine-threonine kinase 1                     |
| 19 | ZAP70    | zeta-chain (TCR) associated protein kinase 70kDa                            |
| 19 | GNAS     | GNAS complex locus                                                          |
| 19 | MYH14    | myosin, heavy chain 14, non-muscle                                          |
| 19 | OAS1     | 2'-5'-oligoadenylate synthetase 1, 40/46kDa                                 |
| 19 | DYNLL1   | dynein, light chain, LC8-type 1                                             |
| 19 | NCF1     | neutrophil cytosolic factor 1                                               |
| 19 | UBE2D2   | ubiquitin-conjugating enzyme E2D 2                                          |
| 19 | WWP1     | WW domain containing E3 ubiquitin protein ligase 1                          |
| 18 | ACTR3    | ARP3 actin-related protein 3 homolog (yeast)                                |
| 18 | ITGA6    | integrin, alpha 6                                                           |
| 18 | SIN3A    | SIN3 transcription regulator homolog A (yeast)                              |
| 18 | SDC4     | syndecan 4                                                                  |
| 18 | CALR     | calreticulin                                                                |
| 18 | ACTR1A   | ARP1 actin-related protein 1 homolog A, centractin alpha (yeast)            |
| 18 | PARP1    | poly (ADP-ribose) polymerase 1                                              |
| 18 | OASL     | 2'-5'-oligoadenylate synthetase-like                                        |
| 18 | TGFB2    | transforming growth factor, beta receptor II (70/80kDa)                     |
| 18 | OAS3     | 2'-5'-oligoadenylate synthetase 3, 100kDa                                   |
| 18 | PARK2    | parkinson protein 2, E3 ubiquitin protein ligase (parkin)                   |
| 18 | MAPK7    | mitogen-activated protein kinase 7                                          |
| 18 | BRAF     | v-raf murine sarcoma viral oncogene homolog B1                              |
| 18 | PAFAH1B1 | platelet-activating factor acetylhydrolase 1b, regulatory subunit 1 (45kDa) |
| 18 | STK11    | serine/threonine kinase 11                                                  |
| 17 | ARPC5    | actin related protein 2/3 complex, subunit 5, 16kDa                         |
| 17 | ARPC2    | actin related protein 2/3 complex, subunit 2, 34kDa                         |
| 17 | ARPC3    | actin related protein 2/3 complex, subunit 3, 21kDa                         |
| 17 | ITPR1    | inositol 1,4,5-trisphosphate receptor, type 1                               |
| 17 | BECN1    | beclin 1, autophagy related                                                 |

|    |          |                                                                             |
|----|----------|-----------------------------------------------------------------------------|
| 17 | TRAF3    | TNF receptor-associated factor 3                                            |
| 17 | EPAS1    | endothelial PAS domain protein 1                                            |
| 17 | PSEN2    | presenilin 2 (Alzheimer disease 4)                                          |
| 17 | DCTN2    | dynactin 2 (p50)                                                            |
| 17 | CYFIP2   | cytoplasmic FMR1 interacting protein 2                                      |
| 17 | NCKAP1   | NCK-associated protein 1                                                    |
| 17 | HNRNPK   | heterogeneous nuclear ribonucleoprotein K                                   |
| 16 | RNF41    | ring finger protein 41                                                      |
| 16 | SOX9     | SRY (sex determining region Y)-box 9                                        |
| 16 | KLK3     | kallikrein-related peptidase 3                                              |
| 16 | ATM      | ataxia telangiectasia mutated                                               |
| 16 | DYNC1I2  | dynein, cytoplasmic 1, intermediate chain 2                                 |
| 16 | GBP2     | guanylate binding protein 2, interferon-inducible                           |
| 16 | TFRC     | transferrin receptor (p90, CD71)                                            |
| 16 | DCTN3    | dynactin 3 (p22)                                                            |
| 16 | APOE     | apolipoprotein E                                                            |
| 16 | RARA     | retinoic acid receptor, alpha                                               |
| 15 | NME1     | NME/NM23 nucleoside diphosphate kinase 1                                    |
| 15 | RPA1     | replication protein A1, 70kDa                                               |
| 15 | FBXW11   | F-box and WD repeat domain containing 11                                    |
| 15 | ADAR     | adenosine deaminase, RNA-specific                                           |
| 15 | F11R     | F11 receptor                                                                |
| 15 | NCSTN    | nicastatin                                                                  |
| 15 | ARPC1A   | actin related protein 2/3 complex, subunit 1A, 41kDa                        |
| 15 | SPP1     | secreted phosphoprotein 1                                                   |
| 15 | IFNGR1   | interferon gamma receptor 1                                                 |
| 14 | DNAJA3   | DnaJ (Hsp40) homolog, subfamily A, member 3                                 |
| 14 | XRCC6    | X-ray repair complementing defective repair in Chinese hamster cells 6      |
| 14 | ID2      | inhibitor of DNA binding 2, dominant negative helix-loop-helix protein      |
| 14 | DLG1     | discs, large homolog 1 (Drosophila)                                         |
| 14 | UBE2N    | ubiquitin-conjugating enzyme E2N                                            |
| 14 | PRDM10   | PR domain containing 10                                                     |
| 14 | RBPJ     | recombination signal binding protein for immunoglobulin kappa J region      |
| 14 | HSPH1    | heat shock 105kDa/110kDa protein 1                                          |
| 14 | AP1S1    | adaptor-related protein complex 1, sigma 1 subunit                          |
| 14 | ARF1     | ADP-ribosylation factor 1                                                   |
| 13 | CDK6     | cyclin-dependent kinase 6                                                   |
| 13 | RPL13A   | ribosomal protein L13a                                                      |
| 13 | BSG      | basigin (Ok blood group)                                                    |
| 13 | AP2A2    | adaptor-related protein complex 2, alpha 2 subunit                          |
| 13 | SEC13    | SEC13 homolog (S. cerevisiae)                                               |
| 13 | FAU      | Finkel-Biskis-Reilly murine sarcoma virus (FBR-MuSV) ubiquitously expressed |
| 13 | PDIA3    | protein disulfide isomerase family A, member 3                              |
| 13 | CYBA     | cytochrome b-245, alpha polypeptide                                         |
| 13 | FES      | feline sarcoma oncogene                                                     |
| 13 | DCTN6    | dynactin 6                                                                  |
| 13 | DCTN4    | dynactin 4 (p62)                                                            |
| 13 | CNR1     | cannabinoid receptor 1 (brain)                                              |
| 13 | PRKAR1A  | protein kinase, cAMP-dependent, regulatory, type I, alpha                   |
| 13 | CAT      | catalase                                                                    |
| 13 | HIPK2    | homeodomain interacting protein kinase 2                                    |
| 13 | MBP      | myelin basic protein                                                        |
| 12 | OSBPL1A  | oxysterol binding protein-like 1A                                           |
| 12 | ITGA3    | integrin, alpha 3 (antigen CD49C, alpha 3 subunit of VLA-3 receptor)        |
| 12 | NF1      | neurofibromin 1                                                             |
| 12 | RILP     | Rab interacting lysosomal protein                                           |
| 12 | IFITM1   | interferon induced transmembrane protein 1                                  |
| 12 | TF       | transferrin                                                                 |
| 12 | NPY      | neuropeptide Y                                                              |
| 12 | LMO4     | LIM domain only 4                                                           |
| 12 | CACNA1C  | calcium channel, voltage-dependent, L type, alpha 1C subunit                |
| 12 | DDX58    | DEAD (Asp-Glu-Ala-Asp) box polypeptide 58                                   |
| 12 | DDX41    | DEAD (Asp-Glu-Ala-Asp) box polypeptide 41                                   |
| 12 | GATA2    | GATA binding protein 2                                                      |
| 12 | DYNC2L1  | dynein, cytoplasmic 2, light intermediate chain 1                           |
| 12 | PIP5K1C  | phosphatidylinositol-4-phosphate 5-kinase, type I, gamma                    |
| 12 | RPL22    | ribosomal protein L22                                                       |
| 12 | DYNC1LI2 | dynein, cytoplasmic 1, light intermediate chain 2                           |
| 12 | PRDX1    | peroxiredoxin 1                                                             |
| 12 | IP6K2    | inositol hexakisphosphate kinase 2                                          |
| 11 | CXCL11   | chemokine (C-X-C motif) ligand 11                                           |
| 11 | TNFRSF21 | tumor necrosis factor receptor superfamily, member 21                       |
| 11 | HDAC5    | histone deacetylase 5                                                       |
| 11 | APLN     | apelin                                                                      |

|    |        |                                                                                            |
|----|--------|--------------------------------------------------------------------------------------------|
| 11 | RPS14  | ribosomal protein S14                                                                      |
| 11 | RPS19  | ribosomal protein S19                                                                      |
| 11 | GNRH1  | gonadotropin-releasing hormone 1 (luteinizing-releasing hormone)                           |
| 11 | RPS24  | ribosomal protein S24                                                                      |
| 11 | IFI6   | interferon, alpha-inducible protein 6                                                      |
| 11 | ELMO1  | engulfment and cell motility 1                                                             |
| 11 | EFNB2  | ephrin-B2                                                                                  |
| 11 | FGF10  | fibroblast growth factor 10                                                                |
| 11 | SLC3A2 | solute carrier family 3 (activators of dibasic and neutral amino acid transport), member 2 |
| 11 | MX2    | myxovirus (influenza virus) resistance 2 (mouse)                                           |
| 11 | SOD2   | superoxide dismutase 2, mitochondrial                                                      |
| 11 | SAR1B  | SAR1 homolog B ( <i>S. cerevisiae</i> )                                                    |
| 11 | EPRS   | glutamyl-prolyl-tRNA synthetase                                                            |
| 11 | PLA2G6 | phospholipase A2, group VI (cytosolic, calcium-independent)                                |
| 11 | JAG1   | jagged 1                                                                                   |
| 11 | DUSP3  | dual specificity phosphatase 3                                                             |
| 11 | CLTA   | clathrin, light chain A                                                                    |
| 11 | UBE2D3 | ubiquitin-conjugating enzyme E2D 3                                                         |
| 11 | TICAM1 | toll-like receptor adaptor molecule 1                                                      |
| 10 | OGT    | O-linked N-acetylglucosamine (GlcNAc) transferase                                          |
| 10 | AP1G1  | adaptor-related protein complex 1, gamma 1 subunit                                         |
| 10 | UBQLN1 | ubiquilin 1                                                                                |
| 10 | RPS17  | ribosomal protein S17                                                                      |
| 10 | FTH1   | ferritin, heavy polypeptide 1                                                              |
| 10 | SEC31A | SEC31 homolog A ( <i>S. cerevisiae</i> )                                                   |
| 10 | GAL    | galanin/GMAP prepropeptide                                                                 |
| 10 | SCARB1 | scavenger receptor class B, member 1                                                       |
| 10 | THPO   | thrombopoietin                                                                             |
| 10 | UBE2V1 | ubiquitin-conjugating enzyme E2 variant 1                                                  |
| 10 | EPS8   | epidermal growth factor receptor pathway substrate 8                                       |
| 10 | AP1S2  | adaptor-related protein complex 1, sigma 2 subunit                                         |
| 10 | RICTOR | RPTOR independent companion of MTOR, complex 2                                             |
| 10 | ADORA3 | adenosine A3 receptor                                                                      |

---

Supplementary Table 8. Pathway enrichment analyses on the list of statistically deregulated neuroinflammatory genes in SALS patients.

| #  | Maps                                                                           | min(pValue) | Min FDR   | SALS1/CTRL+ |           | SALS2_CTRL |           |
|----|--------------------------------------------------------------------------------|-------------|-----------|-------------|-----------|------------|-----------|
|    |                                                                                |             |           | p-value     | FDR       | p-value    | FDR       |
| 1  | Immune response_Classical complement pathway                                   | 1.384E-17   | 1.082E-14 | 1.384E-17   | 1.082E-14 | 1.090E-02  | 1.752E-02 |
| 2  | Immune response_Role of PKR in stress-induced antiviral cell response          | 8.973E-17   | 8.318E-15 | 5.572E-04   | 4.685E-03 | 8.973E-17  | 8.318E-15 |
| 3  | Immune response_Lectin induced complement pathway                              | 9.264E-17   | 3.622E-14 | 9.264E-17   | 3.622E-14 | 2.192E-03  | 4.080E-03 |
| 4  | Immune response_HMGB1/RAGE signaling pathway                                   | 1.427E-15   | 1.203E-13 | 3.541E-04   | 3.505E-03 | 1.427E-15  | 1.203E-13 |
| 5  | SLE genetic marker-specific pathways in T cells                                | 2.990E-15   | 2.133E-13 | 4.328E-09   | 2.821E-07 | 2.990E-15  | 2.133E-13 |
| 6  | Oxidative stress_Activation of NADPH oxidase                                   | 3.036E-15   | 2.133E-13 | 1.659E-02   | 5.253E-02 | 3.036E-15  | 2.133E-13 |
| 7  | PDE4 regulation of cyto/chemokine expression in inflammatory skin diseases     | 3.221E-15   | 2.133E-13 | 3.743E-02   | 9.413E-02 | 3.221E-15  | 2.133E-13 |
| 8  | Immune response_B cell antigen receptor (BCR) pathway                          | 8.304E-15   | 5.132E-13 | 1.886E-03   | 1.109E-02 | 8.304E-15  | 5.132E-13 |
| 9  | Development_VEGF signaling via VEGFR2 - generic cascades                       | 2.129E-14   | 1.234E-12 | 2.646E-04   | 2.914E-03 | 2.129E-14  | 1.234E-12 |
| 10 | Immune response_Antigen presentation by MHC class I, classical pathway         | 2.835E-14   | 1.546E-12 | 3.982E-04   | 3.731E-03 | 2.835E-14  | 1.546E-12 |
| 11 | Immune response_Platelet activating factor/PTAFR pathway signaling             | 4.701E-14   | 2.293E-12 | 2.570E-03   | 1.305E-02 | 4.701E-14  | 2.293E-12 |
| 12 | Immune response_T cell receptor signaling pathway                              | 4.701E-14   | 2.293E-12 | 2.570E-03   | 1.305E-02 | 4.701E-14  | 2.293E-12 |
| 13 | Development_EGFR signaling pathway                                             | 7.271E-14   | 3.210E-12 | 9.080E-03   | 3.395E-02 | 7.271E-14  | 3.210E-12 |
| 14 | Role of Tissue factor in cancer independent of coagulation protease signaling  | 1.408E-13   | 5.933E-12 | 1.757E-03   | 1.049E-02 | 1.408E-13  | 5.933E-12 |
| 15 | Aberrant production of IL-2 and IL-17 in SLE T cells                           | 1.978E-13   | 7.973E-12 | 3.369E-03   | 1.597E-02 | 1.978E-13  | 7.973E-12 |
| 16 | Immune response_CD16 signaling in NK cells                                     | 2.733E-13   | 1.056E-11 | 8.445E-06   | 2.608E-04 | 2.733E-13  | 1.056E-11 |
| 17 | Development_c-Kit ligand signaling pathway during hemopoiesis                  | 7.479E-13   | 2.773E-11 | 1.414E-04   | 1.962E-03 | 7.479E-13  | 2.773E-11 |
| 18 | Immune response_IL-3 signaling via ERK and PI3K                                | 1.157E-12   | 4.117E-11 | 2.540E-04   | 2.878E-03 | 1.157E-12  | 4.117E-11 |
| 19 | Development_Cytokine-mediated regulation of megakaryopoiesis                   | 1.199E-12   | 4.117E-11 | 5.572E-04   | 4.685E-03 | 1.199E-12  | 4.117E-11 |
| 20 | Immune response_ICOS signaling pathway in T-helper cell                        | 1.722E-12   | 5.700E-11 | 2.704E-05   | 6.219E-04 | 1.722E-12  | 5.700E-11 |
| 21 | Signal transduction_Additional pathways of NF-kB activation (in the cytoplasm) | 1.873E-12   | 5.986E-11 | 1.507E-01   | 2.567E-01 | 1.873E-12  | 5.986E-11 |
| 22 | Immune response_CCL2 signaling                                                 | 2.954E-12   | 8.557E-11 | 4.758E-02   | 1.130E-01 | 2.954E-12  | 8.557E-11 |
| 23 | Immune response_Role of DAP12 receptors in NK cells                            | 4.601E-12   | 1.292E-10 | 8.672E-06   | 2.608E-04 | 4.601E-12  | 1.292E-10 |
| 24 | Immune response_TLR2 and TLR4 signaling pathways                               | 1.078E-11   | 2.848E-10 | 5.609E-02   | 1.286E-01 | 1.078E-11  | 2.848E-10 |
| 25 | Immune response_IL-15 signaling                                                | 1.415E-11   | 3.451E-10 | 7.538E-02   | 1.583E-01 | 1.415E-11  | 3.451E-10 |
| 26 | Cell adhesion_Chemokines and adhesion                                          | 2.272E-11   | 5.137E-10 | 3.726E-09   | 2.649E-07 | 2.272E-11  | 5.137E-10 |
| 27 | SLE genetic marker-specific pathways in B cells                                | 2.272E-11   | 5.137E-10 | 2.034E-07   | 1.060E-05 | 2.272E-11  | 5.137E-10 |
| 28 | Immune response_IL-4 signaling pathway                                         | 2.480E-11   | 5.473E-10 | 9.783E-03   | 3.579E-02 | 2.480E-11  | 5.473E-10 |
| 29 | Immune response_HSP60 and HSP70/TLR signaling pathway                          | 2.692E-11   | 5.802E-10 | 3.982E-04   | 3.731E-03 | 2.692E-11  | 5.802E-10 |
| 30 | Immune response_IL-18 signaling                                                | 3.571E-11   | 6.962E-10 | 3.996E-03   | 1.838E-02 | 3.571E-11  | 6.962E-10 |
| 31 | Apoptosis and survival_NGF/TrkA PI3K-mediated signaling                        | 3.605E-11   | 6.962E-10 | 1.353E-04   | 1.923E-03 | 3.605E-11  | 6.962E-10 |
| 32 | Immune response_IL-5 signaling via PI3K, MAPK and NF-kB                        | 3.605E-11   | 6.962E-10 | 7.128E-04   | 5.630E-03 | 3.605E-11  | 6.962E-10 |
| 33 | Cytoskeleton remodeling_Cytoskeleton remodeling                                | 3.888E-11   | 7.356E-10 | 9.801E-06   | 2.839E-04 | 3.888E-11  | 7.356E-10 |
| 34 | Development_Non-genomic action of Retinoic acid in cell differentiation        | 4.070E-11   | 7.397E-10 | 1.629E-01   | 2.733E-01 | 4.070E-11  | 7.397E-10 |
| 35 | Immune response_Fc epsilon RI pathway                                          | 4.070E-11   | 7.397E-10 | 4.465E-04   | 4.013E-03 | 4.070E-11  | 7.397E-10 |
| 36 | Development_Adenosine A2B receptor signaling                                   | 4.361E-11   | 7.774E-10 | 3.743E-02   | 9.413E-02 | 4.361E-11  | 7.774E-10 |
| 37 | Immune response_IL-6 signaling pathway via JAK/STAT                            | 4.751E-11   | 8.310E-10 | 4.521E-04   | 4.018E-03 | 4.751E-11  | 8.310E-10 |
| 38 | Development_PDGF signaling via STATs and NF-kB                                 | 6.419E-11   | 1.102E-09 | 8.312E-03   | 3.155E-02 | 6.419E-11  | 1.102E-09 |
| 39 | Cytoskeleton remodeling_TGF, WNT and cytoskeletal remodeling                   | 7.224E-11   | 1.218E-09 | 1.759E-08   | 9.824E-07 | 7.224E-11  | 1.218E-09 |
| 40 | Signal transduction_mTORC2 downstream signaling                                | 8.608E-11   | 1.425E-09 | 1.613E-03   | 9.855E-03 | 8.608E-11  | 1.425E-09 |

|    |                                                                                                    |           |           |           |           |           |           |
|----|----------------------------------------------------------------------------------------------------|-----------|-----------|-----------|-----------|-----------|-----------|
| 41 | Cytoskeleton remodeling_FAK signaling                                                              | 9.008E-11 | 1.448E-09 | 1.445E-02 | 4.709E-02 | 9.008E-11 | 1.448E-09 |
| 42 | Immune response_IL-6 signaling pathway via MEK/ERK and PI3K/AKT cascades                           | 9.150E-11 | 1.448E-09 | 2.633E-03 | 1.329E-02 | 9.150E-11 | 1.448E-09 |
| 43 | Main pathways of Schwann cells transformation in neurofibromatosis type 1                          | 9.214E-11 | 1.448E-09 | 9.199E-04 | 6.661E-03 | 9.214E-11 | 1.448E-09 |
| 44 | Oxidative stress_Activation of NOX1, NOX5, DUOX1 and DUOX2 NADPH Oxidases                          | 1.043E-10 | 1.611E-09 | 8.987E-02 | 1.809E-01 | 1.043E-10 | 1.611E-09 |
| 45 | Immune response_Role of DPP4 (CD26) in immune regulation                                           | 1.078E-10 | 1.638E-09 | 6.491E-03 | 2.551E-02 | 1.078E-10 | 1.638E-09 |
| 46 | LRRK2 in neurons in Parkinson's disease                                                            | 1.165E-10 | 1.715E-09 | 5.140E-09 | 3.092E-07 | 1.165E-10 | 1.715E-09 |
| 47 | Normal and pathological TGF-beta-mediated regulation of cell proliferation                         | 1.165E-10 | 1.715E-09 | 1.564E-04 | 2.073E-03 | 1.165E-10 | 1.715E-09 |
| 48 | Mucin expression in CF airways                                                                     | 1.207E-10 | 1.748E-09 | 2.548E-01 | 3.731E-01 | 1.207E-10 | 1.748E-09 |
| 49 | Development_Prolactin receptor signaling                                                           | 1.320E-10 | 1.882E-09 | 3.369E-03 | 1.597E-02 | 1.320E-10 | 1.882E-09 |
| 50 | Apoptosis and survival_Role of PKR in stress-induced apoptosis                                     | 1.530E-10 | 2.141E-09 | 2.123E-03 | 1.145E-02 | 1.530E-10 | 2.141E-09 |
| 51 | Myeloid-derived suppressor cells and M2 macrophages in cancer                                      | 1.547E-10 | 2.141E-09 | 8.077E-01 | 8.289E-01 | 1.547E-10 | 2.141E-09 |
| 52 | Immune response_IL-2 activation and signaling pathway                                              | 1.668E-10 | 2.273E-09 | 1.261E-03 | 8.217E-03 | 1.668E-10 | 2.273E-09 |
| 53 | Development_FGFR signaling pathway                                                                 | 2.271E-10 | 3.051E-09 | 4.758E-02 | 1.130E-01 | 2.271E-10 | 3.051E-09 |
| 54 | Immune response_CCR3 signaling in eosinophils                                                      | 2.332E-10 | 3.089E-09 | 1.313E-01 | 2.304E-01 | 2.332E-10 | 3.089E-09 |
| 55 | Role of tumor microenvironment in plexiform neurofibroma formation in neurofibromatosis type 1     | 2.506E-10 | 3.234E-09 | 2.871E-03 | 1.406E-02 | 2.506E-10 | 3.234E-09 |
| 56 | PDE4 regulation of cyto/chemokine expression in arthritis                                          | 2.546E-10 | 3.234E-09 | 1.272E-01 | 2.272E-01 | 2.546E-10 | 3.234E-09 |
| 57 | Transcription_CREB signaling pathway                                                               | 2.546E-10 | 3.234E-09 | 3.511E-02 | 9.033E-02 | 2.546E-10 | 3.234E-09 |
| 58 | Reproduction_Gonadotropin-releasing hormone (GnRH) signaling                                       | 3.189E-10 | 3.995E-09 | 3.567E-02 | 9.136E-02 | 3.189E-10 | 3.995E-09 |
| 59 | Immune response_Alternative complement pathway                                                     | 4.558E-10 | 3.960E-08 | 4.558E-10 | 3.960E-08 | 5.656E-05 | 1.573E-04 |
| 60 | Immune response_HMGB1/TLR signaling pathway                                                        | 5.971E-10 | 7.345E-09 | 6.231E-02 | 1.380E-01 | 5.971E-10 | 7.345E-09 |
| 61 | Immune response_IL-3 signaling via JAK/STAT, p38, JNK and NF-kB                                    | 6.022E-10 | 7.345E-09 | 3.701E-06 | 1.357E-04 | 6.022E-10 | 7.345E-09 |
| 62 | Immune response_Naive CD4+ T cell differentiation                                                  | 6.354E-10 | 7.649E-09 | 1.004E-03 | 6.827E-03 | 6.354E-10 | 7.649E-09 |
| 63 | Main growth factor signaling cascades in multiple myeloma cells                                    | 6.511E-10 | 7.738E-09 | 3.586E-03 | 1.669E-02 | 6.511E-10 | 7.738E-09 |
| 64 | Development_PDGF signaling via MAPK cascades                                                       | 9.628E-10 | 1.130E-08 | 1.127E-03 | 7.597E-03 | 9.628E-10 | 1.130E-08 |
| 65 | Immune response_Inhibitory PD-1 signaling in T cells                                               | 1.228E-09 | 1.424E-08 | 2.123E-03 | 1.145E-02 | 1.228E-09 | 1.424E-08 |
| 66 | Immune response_TREM1 signaling pathway                                                            | 1.410E-09 | 1.609E-08 | 1.659E-02 | 5.253E-02 | 1.410E-09 | 1.609E-08 |
| 67 | Immune response_Histamine H1 receptor signaling in immune response                                 | 1.440E-09 | 1.609E-08 | 1.216E-01 | 2.208E-01 | 1.440E-09 | 1.609E-08 |
| 68 | IL-17-induced mucin expression in CF airways                                                       | 1.440E-09 | 1.609E-08 | 3.288E-02 | 8.655E-02 | 1.440E-09 | 1.609E-08 |
| 69 | Inhibition of neutrophil migration by proresolving lipid mediators in COPD                         | 1.493E-09 | 1.648E-08 | 1.508E-06 | 6.937E-05 | 1.493E-09 | 1.648E-08 |
| 70 | Cytoskeleton remodeling_Hyaluronic acid/ CD44 signaling pathways                                   | 1.582E-09 | 1.675E-08 | 1.033E-05 | 2.885E-04 | 1.582E-09 | 1.675E-08 |
| 71 | Signal transduction_PTMs in BAFF-induced canonical NF-kB signaling                                 | 1.582E-09 | 1.675E-08 | 2.979E-01 | 4.182E-01 | 1.582E-09 | 1.675E-08 |
| 72 | Immune response_Role of integrins in NK cells cytotoxicity                                         | 1.590E-09 | 1.675E-08 | 3.505E-04 | 3.505E-03 | 1.590E-09 | 1.675E-08 |
| 73 | Role of Tissue factor-induced Thrombin signaling in cancerogenesis                                 | 2.050E-09 | 2.112E-08 | 6.395E-03 | 2.551E-02 | 2.050E-09 | 2.112E-08 |
| 74 | Development_PEDF signaling                                                                         | 2.129E-09 | 2.169E-08 | 3.539E-01 | 4.692E-01 | 2.129E-09 | 2.169E-08 |
| 75 | Neurogenesis_NGF/ TrkA MAPK-mediated signaling                                                     | 2.167E-09 | 2.183E-08 | 1.724E-02 | 5.435E-02 | 2.167E-09 | 2.183E-08 |
| 76 | Chemotaxis_CXCR4 signaling pathway                                                                 | 2.357E-09 | 2.349E-08 | 1.538E-03 | 9.620E-03 | 2.357E-09 | 2.349E-08 |
| 77 | Immune response_IL-1 signaling pathway                                                             | 2.411E-09 | 2.353E-08 | 1.000E-01 | 1.936E-01 | 2.411E-09 | 2.353E-08 |
| 78 | Apoptosis and survival_Inhibition of ROS-induced apoptosis by 17beta-estradiol                     | 2.411E-09 | 2.353E-08 | 3.073E-01 | 4.245E-01 | 2.411E-09 | 2.353E-08 |
| 79 | Signal transduction_PTMs (ubiquitination and phosphorylation) in TNF-alpha-induced NF-kB signaling | 2.521E-09 | 2.434E-08 | 7.553E-02 | 1.583E-01 | 2.521E-09 | 2.434E-08 |
| 80 | Rheumatoid arthritis (general schema)                                                              | 3.111E-09 | 2.973E-08 | 3.817E-06 | 1.357E-04 | 3.111E-09 | 2.973E-08 |
| 81 | Signal transduction_Additional pathways of NF-kB activation (in the nucleus)                       | 3.274E-09 | 3.097E-08 | 3.953E-02 | 9.814E-02 | 3.274E-09 | 3.097E-08 |
| 82 | Immune response_CD28 signaling                                                                     | 3.582E-09 | 3.354E-08 | 7.610E-05 | 1.322E-03 | 3.582E-09 | 3.354E-08 |
| 83 | Development_Gastrin in cell growth and proliferation                                               | 3.795E-09 | 3.518E-08 | 2.018E-02 | 6.093E-02 | 3.795E-09 | 3.518E-08 |

|     |                                                                                                          |           |           |           |           |           |           |
|-----|----------------------------------------------------------------------------------------------------------|-----------|-----------|-----------|-----------|-----------|-----------|
| 84  | Signal transduction_NF-kB activation pathways                                                            | 4.495E-09 | 4.126E-08 | 9.161E-03 | 3.395E-02 | 4.495E-09 | 4.126E-08 |
| 85  | Signal transduction_PTMs in IL-23 signaling pathway                                                      | 5.587E-09 | 5.077E-08 | 1.850E-01 | 2.996E-01 | 5.587E-09 | 5.077E-08 |
| 86  | Signal transduction_PTMs (phosphorylation) in TNF-alpha-induced NF-kB signaling                          | 6.029E-09 | 5.374E-08 | 1.961E-02 | 5.947E-02 | 6.029E-09 | 5.374E-08 |
| 87  | Signal transduction_PTMs (phosphorylation and acetylation) in TNF-alpha-induced NF-kB signaling          | 6.029E-09 | 5.374E-08 | 3.586E-03 | 1.669E-02 | 6.029E-09 | 5.374E-08 |
| 88  | Development_EPO-induced Jak-STAT pathway                                                                 | 6.187E-09 | 5.411E-08 | 2.317E-01 | 3.478E-01 | 6.187E-09 | 5.411E-08 |
| 89  | HBV signaling via protein kinases leading to HCC                                                         | 6.187E-09 | 5.411E-08 | 1.258E-02 | 4.206E-02 | 6.187E-09 | 5.411E-08 |
| 90  | Signal transduction_Activation of PKC via G-Protein coupled receptor                                     | 6.429E-09 | 5.570E-08 | 4.233E-02 | 1.035E-01 | 6.429E-09 | 5.570E-08 |
| 91  | Immune response_CCR5 signaling in macrophages and T lymphocytes                                          | 6.985E-09 | 5.887E-08 | 1.550E-02 | 4.967E-02 | 6.985E-09 | 5.887E-08 |
| 92  | Immune response_IL-33 signaling pathway                                                                  | 6.985E-09 | 5.887E-08 | 5.909E-02 | 1.328E-01 | 6.985E-09 | 5.887E-08 |
| 93  | Development_TGF-beta-dependent induction of EMT via MAPK                                                 | 7.877E-09 | 6.578E-08 | 2.052E-05 | 5.349E-04 | 7.877E-09 | 6.578E-08 |
| 94  | Immune response_MIF-mediated glucocorticoid regulation                                                   | 8.903E-09 | 7.369E-08 | 1.962E-02 | 5.947E-02 | 8.903E-09 | 7.369E-08 |
| 95  | SLE genetic marker-specific pathways in antigen-presenting cells (APC)                                   | 9.196E-09 | 7.544E-08 | 4.910E-05 | 9.142E-04 | 9.196E-09 | 7.544E-08 |
| 96  | Muscle contraction_Relaxin signaling pathway                                                             | 1.141E-08 | 9.115E-08 | 3.447E-01 | 4.631E-01 | 1.141E-08 | 9.115E-08 |
| 97  | Stimulation of TGF-beta signaling in lung cancer                                                         | 1.141E-08 | 9.115E-08 | 3.288E-02 | 8.655E-02 | 1.141E-08 | 9.115E-08 |
| 98  | Oxidative stress_Role of IL-8 signaling pathway in respiratory burst                                     | 1.141E-08 | 9.115E-08 | 3.447E-01 | 4.631E-01 | 1.141E-08 | 9.115E-08 |
| 99  | Development_VEGF signaling and activation                                                                | 1.357E-08 | 1.075E-07 | 9.489E-02 | 1.879E-01 | 1.357E-08 | 1.075E-07 |
| 100 | Signal transduction_IP3 signaling                                                                        | 1.633E-08 | 1.283E-07 | 3.539E-01 | 4.692E-01 | 1.633E-08 | 1.283E-07 |
| 101 | Development_Flt3 signaling                                                                               | 1.995E-08 | 1.554E-07 | 4.887E-03 | 2.123E-02 | 1.995E-08 | 1.554E-07 |
| 102 | Immune response_Th17, Th22 and Th9 cell differentiation                                                  | 2.288E-08 | 1.724E-07 | 4.056E-04 | 3.731E-03 | 2.288E-08 | 1.724E-07 |
| 103 | HIV-1 signaling via CCR5 in macrophages and T lymphocytes                                                | 2.288E-08 | 1.724E-07 | 7.553E-02 | 1.583E-01 | 2.288E-08 | 1.724E-07 |
| 104 | Immune response_HMGB1 release from the cell                                                              | 2.288E-08 | 1.724E-07 | 4.781E-05 | 9.142E-04 | 2.288E-08 | 1.724E-07 |
| 105 | Development_Thromboxane A2 signaling pathway                                                             | 2.315E-08 | 1.730E-07 | 1.565E-03 | 9.638E-03 | 2.315E-08 | 1.730E-07 |
| 106 | Cell adhesion_Alpha-4 integrins in cell migration and adhesion                                           | 2.403E-08 | 1.776E-07 | 1.031E-02 | 3.647E-02 | 2.403E-08 | 1.776E-07 |
| 107 | Immune response_IL-10 signaling pathway                                                                  | 2.413E-08 | 1.776E-07 | 4.705E-03 | 2.090E-02 | 2.413E-08 | 1.776E-07 |
| 108 | Immune response_IFN gamma signaling pathway                                                              | 2.446E-08 | 1.785E-07 | 5.316E-02 | 1.248E-01 | 2.446E-08 | 1.785E-07 |
| 109 | Immune response_MIF - the neuroendocrine-macrophage connector                                            | 2.895E-08 | 2.097E-07 | 1.053E-01 | 2.022E-01 | 2.895E-08 | 2.097E-07 |
| 110 | Immune response_Function of MEF2 in T lymphocytes                                                        | 3.247E-08 | 2.333E-07 | 1.388E-01 | 2.412E-01 | 3.247E-08 | 2.333E-07 |
| 111 | Immune response_MIF in innate immunity response                                                          | 3.424E-08 | 2.442E-07 | 3.214E-03 | 1.561E-02 | 3.424E-08 | 2.442E-07 |
| 112 | Development_Osteopontin signaling in osteoclasts                                                         | 3.662E-08 | 2.591E-07 | 8.554E-04 | 6.251E-03 | 3.662E-08 | 2.591E-07 |
| 113 | Role of growth factor receptors transactivation by Hyaluronic acid / CD44 signaling in tumor progression | 3.747E-08 | 2.632E-07 | 2.280E-05 | 5.571E-04 | 3.747E-08 | 2.632E-07 |
| 114 | Immune response_MIF-induced cell adhesion, migration and angiogenesis                                    | 4.153E-08 | 2.873E-07 | 1.430E-04 | 1.962E-03 | 4.153E-08 | 2.873E-07 |
| 115 | Development_Thrombopoietin-regulated cell processes                                                      | 4.153E-08 | 2.873E-07 | 2.867E-02 | 7.866E-02 | 4.153E-08 | 2.873E-07 |
| 116 | Development_IGF-1 receptor signaling                                                                     | 4.512E-08 | 3.045E-07 | 9.931E-03 | 3.579E-02 | 4.512E-08 | 3.045E-07 |
| 117 | Development_FGF-family signaling                                                                         | 4.512E-08 | 3.045E-07 | 4.233E-02 | 1.035E-01 | 4.512E-08 | 3.045E-07 |
| 118 | G-protein signaling_Proinsulin C-peptide signaling                                                       | 4.512E-08 | 3.045E-07 | 9.931E-03 | 3.579E-02 | 4.512E-08 | 3.045E-07 |
| 119 | Effect of H. pylori infection on gastric epithelial cell proliferation                                   | 4.533E-08 | 3.045E-07 | 5.909E-02 | 1.328E-01 | 4.533E-08 | 3.045E-07 |
| 120 | Development_VEGF-family signaling                                                                        | 5.052E-08 | 3.369E-07 | 2.790E-01 | 4.003E-01 | 5.052E-08 | 3.369E-07 |
| 121 | PI3K Signal Transduction Pathway_Simona                                                                  | 5.567E-08 | 3.686E-07 | 5.450E-03 | 2.316E-02 | 5.567E-08 | 3.686E-07 |
| 122 | Development_Adenosine A1 receptor signaling                                                              | 6.213E-08 | 4.056E-07 | 1.074E-02 | 3.734E-02 | 6.213E-08 | 4.056E-07 |
| 123 | Development_Endothelin-1/EDNRA signaling                                                                 | 6.213E-08 | 4.056E-07 | 2.123E-03 | 1.145E-02 | 6.213E-08 | 4.056E-07 |
| 124 | Apoptosis and survival_BAD phosphorylation                                                               | 7.353E-08 | 4.766E-07 | 2.126E-02 | 6.321E-02 | 7.353E-08 | 4.766E-07 |
| 125 | IGF family signaling in colorectal cancer                                                                | 8.150E-08 | 5.246E-07 | 6.536E-02 | 1.444E-01 | 8.150E-08 | 5.246E-07 |
| 126 | Immune response_TLR5, TLR7, TLR8 and TLR9 signaling pathways                                             | 8.264E-08 | 5.283E-07 | 3.288E-02 | 8.655E-02 | 8.264E-08 | 5.283E-07 |

|     |                                                                                         |           |           |           |           |           |           |
|-----|-----------------------------------------------------------------------------------------|-----------|-----------|-----------|-----------|-----------|-----------|
| 127 | Th17 cells in CF                                                                        | 8.481E-08 | 5.385E-07 | 2.338E-03 | 1.244E-02 | 8.481E-08 | 5.385E-07 |
| 128 | Immune response_Role of HMGB1 in dendritic cell maturation and migration                | 8.796E-08 | 5.547E-07 | 5.156E-04 | 4.480E-03 | 8.796E-08 | 5.547E-07 |
| 129 | B cell signaling in hematological malignancies                                          | 9.054E-08 | 5.671E-07 | 1.820E-04 | 2.259E-03 | 9.054E-08 | 5.671E-07 |
| 130 | Signal transduction_PTMs in IL-17-induced CIKS-dependent MAPK signaling pathways        | 9.306E-08 | 5.789E-07 | 4.656E-02 | 1.117E-01 | 9.306E-08 | 5.789E-07 |
| 131 | Role of cell adhesion in vaso-occlusion in Sickle cell disease                          | 1.056E-07 | 6.486E-07 | 6.963E-04 | 5.556E-03 | 1.056E-07 | 6.486E-07 |
| 132 | Tissue Factor signaling in cancer via PAR1 and PAR2                                     | 1.148E-07 | 6.911E-07 | 3.539E-01 | 4.692E-01 | 1.148E-07 | 6.911E-07 |
| 133 | Immune response_Bacterial infections in normal airways                                  | 1.148E-07 | 6.911E-07 | 3.511E-02 | 9.033E-02 | 1.148E-07 | 6.911E-07 |
| 134 | Blood coagulation_GPVI-dependent platelet activation                                    | 1.148E-07 | 6.911E-07 | 2.570E-03 | 1.305E-02 | 1.148E-07 | 6.911E-07 |
| 135 | Glucocorticoid-induced elevation of intraocular pressure as glaucoma risk factor        | 1.425E-07 | 8.457E-07 | 4.705E-03 | 2.090E-02 | 1.425E-07 | 8.457E-07 |
| 136 | Development_EGFR signaling via small GTPases                                            | 1.437E-07 | 8.457E-07 | 1.564E-04 | 2.073E-03 | 1.437E-07 | 8.457E-07 |
| 137 | Immune response_Innate immune response to RNA viral infection                           | 1.441E-07 | 8.457E-07 | 3.309E-02 | 8.655E-02 | 1.441E-07 | 8.457E-07 |
| 138 | Development_Angiotensin signaling via PYK2                                              | 1.500E-07 | 8.635E-07 | 4.887E-03 | 2.123E-02 | 1.500E-07 | 8.635E-07 |
| 139 | Nociception_Expression and role of Nociceptin in immune system                          | 1.500E-07 | 8.635E-07 | 3.073E-01 | 4.245E-01 | 1.500E-07 | 8.635E-07 |
| 140 | Influence of smoking on activation of EGFR signaling in lung cancer cells               | 1.500E-07 | 8.635E-07 | 1.000E-01 | 1.936E-01 | 1.500E-07 | 8.635E-07 |
| 141 | Development_GM-CSF signaling                                                            | 1.579E-07 | 8.980E-07 | 8.433E-03 | 3.186E-02 | 1.579E-07 | 8.980E-07 |
| 142 | Immune response_C5a signaling                                                           | 1.579E-07 | 8.980E-07 | 3.743E-02 | 9.413E-02 | 1.579E-07 | 8.980E-07 |
| 143 | Immune response_Gastrin in inflammatory response                                        | 1.629E-07 | 9.209E-07 | 3.043E-02 | 8.259E-02 | 1.629E-07 | 9.209E-07 |
| 144 | Apoptosis and survival_APRIL and BAFF signaling                                         | 1.869E-07 | 1.050E-06 | 4.056E-04 | 3.731E-03 | 1.869E-07 | 1.050E-06 |
| 145 | Immune response_IFN alpha/beta signaling pathway                                        | 2.087E-07 | 1.161E-06 | 2.889E-04 | 3.012E-03 | 2.087E-07 | 1.161E-06 |
| 146 | Immune response_TNF-R2 signaling pathways                                               | 2.105E-07 | 1.161E-06 | 5.386E-03 | 2.302E-02 | 2.105E-07 | 1.161E-06 |
| 147 | Development_EPO-induced MAPK pathway                                                    | 2.105E-07 | 1.161E-06 | 1.239E-04 | 1.794E-03 | 2.105E-07 | 1.161E-06 |
| 148 | Signal transduction_PTMs in BAFF-induced signaling                                      | 2.153E-07 | 1.174E-06 | 1.388E-01 | 2.412E-01 | 2.153E-07 | 1.174E-06 |
| 149 | Immune response_NFAT in immune response                                                 | 2.153E-07 | 1.174E-06 | 3.806E-05 | 8.038E-04 | 2.153E-07 | 1.174E-06 |
| 150 | Pacap Igf1 BS                                                                           | 2.231E-07 | 1.210E-06 | 1.387E-03 | 8.892E-03 | 2.231E-07 | 1.210E-06 |
| 151 | Role of B cells in SLE                                                                  | 2.719E-07 | 1.466E-06 | 9.829E-05 | 1.580E-03 | 2.719E-07 | 1.466E-06 |
| 152 | Signal transduction_PTMs in IL-17-induced CIKS-independent signaling pathways           | 2.922E-07 | 1.566E-06 | 5.920E-03 | 2.418E-02 | 2.922E-07 | 1.566E-06 |
| 153 | Development_Role of IL-8 in angiogenesis                                                | 3.139E-07 | 1.644E-06 | 2.276E-01 | 3.456E-01 | 3.139E-07 | 1.644E-06 |
| 154 | Muscle contraction_Regulation of eNOS activity in endothelial cells                     | 3.139E-07 | 1.644E-06 | 5.936E-03 | 2.418E-02 | 3.139E-07 | 1.644E-06 |
| 155 | Ovarian cancer (main signaling cascades)                                                | 3.139E-07 | 1.644E-06 | 2.221E-04 | 2.592E-03 | 3.139E-07 | 1.644E-06 |
| 156 | NF-AT signaling in cardiac hypertrophy                                                  | 3.139E-07 | 1.644E-06 | 8.246E-02 | 1.703E-01 | 3.139E-07 | 1.644E-06 |
| 157 | Immune response_Oncostatin M signaling via MAPK in mouse cells                          | 3.244E-07 | 1.689E-06 | 5.817E-02 | 1.315E-01 | 3.244E-07 | 1.689E-06 |
| 158 | Immune response_T cell subsets: secreted signals                                        | 3.491E-07 | 1.808E-06 | 2.455E-02 | 7.008E-02 | 3.491E-07 | 1.808E-06 |
| 159 | Development_Thyroliberin signaling                                                      | 4.664E-07 | 2.350E-06 | 4.520E-01 | 5.584E-01 | 4.664E-07 | 2.350E-06 |
| 160 | Apoptosis and survival_TNF-alpha-induced ROS-dependent Caspase-3 signaling              | 4.664E-07 | 2.350E-06 | 1.774E-02 | 5.570E-02 | 4.664E-07 | 2.350E-06 |
| 161 | Immune response_Regulation of T cell function by CTLA-4                                 | 4.753E-07 | 2.369E-06 | 1.999E-03 | 1.141E-02 | 4.753E-07 | 2.369E-06 |
| 162 | G-protein signaling_RAC1 in cellular process                                            | 4.753E-07 | 2.369E-06 | 1.258E-02 | 4.206E-02 | 4.753E-07 | 2.369E-06 |
| 163 | CXCL12_cancer_2                                                                         | 4.862E-07 | 2.410E-06 | 4.172E-01 | 5.271E-01 | 4.862E-07 | 2.410E-06 |
| 164 | Membrane-bound ESR1: interaction with G-proteins signaling                              | 5.182E-07 | 2.528E-06 | 3.994E-01 | 5.129E-01 | 5.182E-07 | 2.528E-06 |
| 165 | Neurophysiological process_Dynein-dynactin motor complex in axonal transport in neurons | 5.182E-07 | 2.528E-06 | 3.982E-04 | 3.731E-03 | 5.182E-07 | 2.528E-06 |
| 166 | Role of IL-23/T17 pathogenic axis in psoriasis                                          | 5.182E-07 | 2.528E-06 | 1.160E-02 | 3.979E-02 | 5.182E-07 | 2.528E-06 |
| 167 | Immune response_Neurotensin-induced activation of IL-8 in colonocytes                   | 5.368E-07 | 2.557E-06 | 8.987E-02 | 1.809E-01 | 5.368E-07 | 2.557E-06 |
| 168 | Immune response_Murine NKG2D signaling                                                  | 5.368E-07 | 2.557E-06 | 2.126E-02 | 6.321E-02 | 5.368E-07 | 2.557E-06 |
| 169 | Immune response_PIP3 signaling in B lymphocytes                                         | 5.368E-07 | 2.557E-06 | 8.595E-06 | 2.608E-04 | 5.368E-07 | 2.557E-06 |

|     |                                                                                       |           |           |           |           |           |           |
|-----|---------------------------------------------------------------------------------------|-----------|-----------|-----------|-----------|-----------|-----------|
| 170 | Development_Growth hormone signaling via PI3K/AKT and MAPK cascades                   | 5.368E-07 | 2.557E-06 | 2.884E-01 | 4.101E-01 | 5.368E-07 | 2.557E-06 |
| 171 | Chemotaxis_CCR1 signaling                                                             | 5.466E-07 | 2.557E-06 | 3.447E-01 | 4.631E-01 | 5.466E-07 | 2.557E-06 |
| 172 | Signal transduction_PTM in IL-12 signaling pathway                                    | 5.466E-07 | 2.557E-06 | 1.261E-03 | 8.217E-03 | 5.466E-07 | 2.557E-06 |
| 173 | Cytoskeleton remodeling_Fibronectin-binding integrins in cell motility                | 5.490E-07 | 2.557E-06 | 1.085E-04 | 1.601E-03 | 5.490E-07 | 2.557E-06 |
| 174 | Cytoskeleton remodeling_Fibronectin-binding integrins in cell motility                | 5.490E-07 | 2.557E-06 | 1.085E-04 | 1.601E-03 | 5.490E-07 | 2.557E-06 |
| 175 | Development_Cross-talk between VEGF and Angiopoietin 1 signaling pathways             | 5.667E-07 | 2.627E-06 | 4.875E-01 | 5.865E-01 | 5.667E-07 | 2.627E-06 |
| 176 | Immune response_Sublytic effects of membrane attack complex                           | 6.567E-07 | 3.014E-06 | 2.479E-01 | 3.676E-01 | 6.567E-07 | 3.014E-06 |
| 177 | Development_Growth factors in regulation of oligodendrocyte precursor cell survival   | 6.860E-07 | 3.117E-06 | 1.384E-02 | 4.527E-02 | 6.860E-07 | 3.117E-06 |
| 178 | Immune response_Oncostatin M signaling via MAPK in human cells                        | 6.860E-07 | 3.117E-06 | 6.659E-02 | 1.450E-01 | 6.860E-07 | 3.117E-06 |
| 179 | Development_G-CSF signaling                                                           | 7.372E-07 | 3.285E-06 | 3.200E-06 | 1.317E-04 | 7.372E-07 | 3.285E-06 |
| 180 | Signal transduction_Soluble CXCL16 signaling                                          | 7.372E-07 | 3.285E-06 | 3.511E-02 | 9.033E-02 | 7.372E-07 | 3.285E-06 |
| 181 | Apoptosis and survival_Anti-apoptotic action of Gastrin                               | 7.449E-07 | 3.304E-06 | 2.299E-02 | 6.658E-02 | 7.449E-07 | 3.304E-06 |
| 182 | Immune response_Human NKG2D signaling                                                 | 9.761E-07 | 4.229E-06 | 2.555E-03 | 1.305E-02 | 9.761E-07 | 4.229E-06 |
| 183 | Neurophysiological process_Corticoliberin signaling via CRHR1                         | 9.854E-07 | 4.229E-06 | 7.239E-01 | 7.589E-01 | 9.854E-07 | 4.229E-06 |
| 184 | Transport_The role of AVP in regulation of Aquaporin 2 and renal water reabsorption   | 9.854E-07 | 4.229E-06 | 1.565E-03 | 9.638E-03 | 9.854E-07 | 4.229E-06 |
| 185 | Immune response_Histamine signaling in dendritic cells                                | 9.854E-07 | 4.229E-06 | 3.631E-01 | 4.773E-01 | 9.854E-07 | 4.229E-06 |
| 186 | Immune response_IL-13 signaling via PI3K-ERK pathway                                  | 9.854E-07 | 4.229E-06 | 3.631E-01 | 4.773E-01 | 9.854E-07 | 4.229E-06 |
| 187 | Transport_Macropinocytosis regulation by growth factors                               | 9.985E-07 | 4.266E-06 | 5.092E-03 | 2.200E-02 | 9.985E-07 | 4.266E-06 |
| 188 | Development_Regulation of epithelial-to-mesenchymal transition (EMT)                  | 1.272E-06 | 5.409E-06 | 5.502E-03 | 2.326E-02 | 1.272E-06 | 5.409E-06 |
| 189 | IL-6 signaling in multiple myeloma                                                    | 1.306E-06 | 5.529E-06 | 9.161E-03 | 3.395E-02 | 1.306E-06 | 5.529E-06 |
| 190 | Development_Insulin, IGF-1 and TNF-alpha in brown adipocyte differentiation           | 1.718E-06 | 7.239E-06 | 1.447E-01 | 2.492E-01 | 1.718E-06 | 7.239E-06 |
| 191 | G-protein signaling_G-Protein alpha-q signaling cascades                              | 1.752E-06 | 7.348E-06 | 5.830E-01 | 6.494E-01 | 1.752E-06 | 7.348E-06 |
| 192 | Development_TGF-beta-dependent induction of EMT via RhoA, PI3K and ILK.               | 1.834E-06 | 7.969E-05 | 1.834E-06 | 7.969E-05 | 2.667E-04 | 6.150E-04 |
| 193 | Development_GDNF family signaling                                                     | 1.869E-06 | 7.701E-06 | 1.106E-01 | 2.074E-01 | 1.869E-06 | 7.701E-06 |
| 194 | Immune response_Inhibitory action of Lipoxins on pro-inflammatory TNF-alpha signaling | 1.869E-06 | 7.701E-06 | 1.106E-01 | 2.074E-01 | 1.869E-06 | 7.701E-06 |
| 195 | Development_Endothelin-1/EDNRA transactivation of EGFR                                | 1.869E-06 | 7.701E-06 | 1.106E-01 | 2.074E-01 | 1.869E-06 | 7.701E-06 |
| 196 | Transcription_Androgen Receptor nuclear signaling                                     | 1.869E-06 | 7.701E-06 | 1.004E-03 | 6.827E-03 | 1.869E-06 | 7.701E-06 |
| 197 | Cytoskeleton remodeling_Role of PKA in cytoskeleton reorganisation                    | 1.901E-06 | 7.764E-06 | 1.805E-02 | 5.602E-02 | 1.901E-06 | 7.764E-06 |
| 198 | Development_GDNF signaling                                                            | 2.226E-06 | 8.970E-06 | 2.201E-02 | 6.399E-02 | 2.226E-06 | 8.970E-06 |
| 199 | Immune response_Th17 cell differentiation                                             | 2.496E-06 | 9.975E-06 | 1.757E-03 | 1.049E-02 | 2.496E-06 | 9.975E-06 |
| 200 | Development_Angiopoietin - Tie2 signaling                                             | 2.496E-06 | 9.975E-06 | 5.817E-02 | 1.315E-01 | 2.496E-06 | 9.975E-06 |
| 201 | Chemotaxis_Leukocyte chemotaxis                                                       | 2.508E-06 | 9.980E-06 | 9.903E-05 | 1.580E-03 | 2.508E-06 | 9.980E-06 |
| 202 | Immune response_Mast cell proliferation, differentiation and survival                 | 3.086E-06 | 1.223E-05 | 8.936E-05 | 1.519E-03 | 3.086E-06 | 1.223E-05 |
| 203 | Bacterial infections in CF airways                                                    | 3.293E-06 | 1.293E-05 | 3.447E-01 | 4.631E-01 | 3.293E-06 | 1.293E-05 |
| 204 | Cell adhesion_Integrin-mediated cell adhesion and migration                           | 3.293E-06 | 1.293E-05 | 3.288E-02 | 8.655E-02 | 3.293E-06 | 1.293E-05 |
| 205 | Immune response_TLR3 and TLR4 induced TICAM1-specific signaling pathway               | 3.350E-06 | 1.310E-05 | 9.024E-02 | 1.809E-01 | 3.350E-06 | 1.310E-05 |
| 206 | Immune response_IL-23 signaling pathway                                               | 3.477E-06 | 1.354E-05 | 1.314E-01 | 2.304E-01 | 3.477E-06 | 1.354E-05 |
| 207 | Immune response_IL-9 signaling pathway                                                | 3.507E-06 | 1.354E-05 | 1.999E-03 | 1.141E-02 | 3.507E-06 | 1.354E-05 |
| 208 | G-protein signaling_Rac2 regulation pathway                                           | 3.507E-06 | 1.354E-05 | 2.580E-04 | 2.883E-03 | 3.507E-06 | 1.354E-05 |
| 209 | Apoptosis and survival_Apoptotic TNF-family pathways                                  | 3.534E-06 | 1.354E-05 | 2.884E-01 | 4.101E-01 | 3.534E-06 | 1.354E-05 |
| 210 | Apoptosis and survival_Lymphotoxin-beta receptor signaling                            | 3.534E-06 | 1.354E-05 | 6.119E-04 | 5.037E-03 | 3.534E-06 | 1.354E-05 |
| 211 | Apoptosis and survival_NO synthesis and signaling                                     | 3.738E-06 | 1.426E-05 | 5.033E-02 | 1.189E-01 | 3.738E-06 | 1.426E-05 |
| 212 | Blood coagulation_GPIIb-IX-V-dependent platelet activation                            | 3.784E-06 | 1.438E-05 | 1.249E-02 | 4.206E-02 | 3.784E-06 | 1.438E-05 |

|     |                                                                                                    |           |           |           |           |           |           |
|-----|----------------------------------------------------------------------------------------------------|-----------|-----------|-----------|-----------|-----------|-----------|
| 213 | Development_Melanocyte development and pigmentation                                                | 4.315E-06 | 1.626E-05 | 7.746E-03 | 2.969E-02 | 4.315E-06 | 1.626E-05 |
| 214 | Th17 cells in CF (mouse model)                                                                     | 4.315E-06 | 1.626E-05 | 2.151E-04 | 2.588E-03 | 4.315E-06 | 1.626E-05 |
| 215 | Development_EPO-induced PI3K/AKT pathway and Ca(2+) influx                                         | 4.743E-06 | 1.766E-05 | 4.421E-03 | 1.998E-02 | 4.743E-06 | 1.766E-05 |
| 216 | Chemotaxis_CCL16-, CCL20-, CXCL16- and CCL25-mediated cell migration                               | 4.743E-06 | 1.766E-05 | 6.693E-01 | 7.111E-01 | 4.743E-06 | 1.766E-05 |
| 217 | Development_Adenosine A2A receptor signaling                                                       | 4.743E-06 | 1.766E-05 | 9.489E-02 | 1.879E-01 | 4.743E-06 | 1.766E-05 |
| 218 | Chemotaxis_CCL2-induced chemotaxis                                                                 | 4.779E-06 | 1.772E-05 | 1.345E-02 | 4.439E-02 | 4.779E-06 | 1.772E-05 |
| 219 | Neuroprotective action of lithium                                                                  | 4.944E-06 | 1.826E-05 | 2.143E-01 | 3.285E-01 | 4.944E-06 | 1.826E-05 |
| 220 | Apoptosis and survival_HTR1A signaling                                                             | 5.610E-06 | 2.064E-05 | 3.631E-01 | 4.773E-01 | 5.610E-06 | 2.064E-05 |
| 221 | Development_Ligand-independent activation of ESR1 and ESR2                                         | 6.303E-06 | 2.309E-05 | 4.887E-03 | 2.123E-02 | 6.303E-06 | 2.309E-05 |
| 222 | Development_Transcription regulation of granulocyte development                                    | 6.399E-06 | 2.326E-05 | 1.943E-01 | 3.105E-01 | 6.399E-06 | 2.326E-05 |
| 223 | Development_Angiotensin signaling via STATs                                                        | 6.399E-06 | 2.326E-05 | 1.943E-01 | 3.105E-01 | 6.399E-06 | 2.326E-05 |
| 224 | Development_SDF-1 signaling in hematopoietic stem cell homing                                      | 6.654E-06 | 2.391E-05 | 4.009E-05 | 8.038E-04 | 6.654E-06 | 2.391E-05 |
| 225 | Apoptosis and survival_Anti-apoptotic action of membrane-bound ESR1                                | 6.654E-06 | 2.391E-05 | 2.506E-01 | 3.676E-01 | 6.654E-06 | 2.391E-05 |
| 226 | Development_Gastrin in differentiation of the gastric mucosa                                       | 6.654E-06 | 2.391E-05 | 6.238E-01 | 6.804E-01 | 6.654E-06 | 2.391E-05 |
| 227 | Inflammatory factors-induced expression of mucins in normal and asthmatic epithelium               | 7.238E-06 | 2.581E-05 | 1.388E-01 | 2.412E-01 | 7.238E-06 | 2.581E-05 |
| 228 | Some pathways of EMT in cancer cells                                                               | 7.238E-06 | 2.581E-05 | 2.777E-04 | 2.934E-03 | 7.238E-06 | 2.581E-05 |
| 229 | Regulation of lipid metabolism_Stimulation of Arachidonic acid production by ACM receptors         | 7.334E-06 | 2.605E-05 | 5.487E-01 | 6.309E-01 | 7.334E-06 | 2.605E-05 |
| 230 | Development_Regulation of cytoskeleton proteins in oligodendrocyte differentiation and myelination | 7.662E-06 | 2.700E-05 | 3.369E-03 | 1.597E-02 | 7.662E-06 | 2.700E-05 |
| 231 | Immune response_PGE2 signaling in immune response                                                  | 8.299E-06 | 2.892E-05 | 2.669E-02 | 7.454E-02 | 8.299E-06 | 2.892E-05 |
| 232 | Development_Adiponectin signaling                                                                  | 8.299E-06 | 2.892E-05 | 3.167E-01 | 4.352E-01 | 8.299E-06 | 2.892E-05 |
| 233 | Cytoskeleton remodeling_ESR1 action on cytoskeleton remodeling and cell migration                  | 8.725E-06 | 3.029E-05 | 2.061E-03 | 1.145E-02 | 8.725E-06 | 3.029E-05 |
| 234 | Transcription_Receptor-mediated HIF regulation                                                     | 9.002E-06 | 3.091E-05 | 2.600E-01 | 3.787E-01 | 9.002E-06 | 3.091E-05 |
| 235 | Development_PACAP signaling in neural cells                                                        | 9.002E-06 | 3.091E-05 | 6.334E-01 | 6.860E-01 | 9.002E-06 | 3.091E-05 |
| 236 | G-protein signaling_Regulation of p38 and JNK signaling mediated by G-proteins                     | 9.002E-06 | 3.091E-05 | 7.553E-02 | 1.583E-01 | 9.002E-06 | 3.091E-05 |
| 237 | Immune response_Antiviral actions of Interferons                                                   | 9.272E-06 | 3.172E-05 | 3.140E-04 | 3.231E-03 | 9.272E-06 | 3.172E-05 |
| 238 | Immune response_Fc gamma R-mediated phagocytosis in macrophages                                    | 1.083E-05 | 3.623E-05 | 5.920E-03 | 2.418E-02 | 1.083E-05 | 3.623E-05 |
| 239 | FGF signaling in pancreatic cancer                                                                 | 1.083E-05 | 3.623E-05 | 2.867E-02 | 7.866E-02 | 1.083E-05 | 3.623E-05 |
| 240 | Cell adhesion_Integrin inside-out signaling in T cells                                             | 1.086E-05 | 3.623E-05 | 9.903E-05 | 1.580E-03 | 1.086E-05 | 3.623E-05 |
| 241 | Signal transduction_PTM in IL-17-induced CIKS-dependent NF-kB signaling and mRNA stabilization     | 1.149E-05 | 3.819E-05 | 1.578E-01 | 2.665E-01 | 1.149E-05 | 3.819E-05 |
| 242 | Immune response_T regulatory cell-mediated modulation of effector T cell and NK cell functions     | 1.180E-05 | 3.891E-05 | 5.071E-05 | 9.222E-04 | 1.180E-05 | 3.891E-05 |
| 243 | Cell cycle_Influence of Ras and Rho proteins on G1/S Transition                                    | 1.180E-05 | 3.891E-05 | 4.491E-02 | 1.085E-01 | 1.180E-05 | 3.891E-05 |
| 244 | Immune response_IL-17 signaling pathways                                                           | 1.200E-05 | 3.944E-05 | 1.946E-01 | 3.105E-01 | 1.200E-05 | 3.944E-05 |
| 245 | Apoptosis and survival_NGF activation of NF-kB                                                     | 1.205E-05 | 3.946E-05 | 1.805E-02 | 5.602E-02 | 1.205E-05 | 3.946E-05 |
| 246 | Signal transduction_Erk Interactions: Inhibition of Erk                                            | 1.246E-05 | 4.052E-05 | 2.129E-01 | 3.277E-01 | 1.246E-05 | 4.052E-05 |
| 247 | Immune response_CXCR4 signaling via second messenger                                               | 1.246E-05 | 4.052E-05 | 2.129E-01 | 3.277E-01 | 1.246E-05 | 4.052E-05 |
| 248 | Immune response_iC3b-induced phagocytosis via alpha-M/beta-2 integrin                              | 1.489E-05 | 4.827E-05 | 4.340E-03 | 1.973E-02 | 1.489E-05 | 4.827E-05 |
| 249 | Immune response_Immunological synapse formation                                                    | 1.568E-05 | 1.257E-04 | 1.568E-05 | 4.229E-04 | 4.393E-05 | 1.257E-04 |
| 250 | Immune response_CD137 signaling in immune cell                                                     | 1.645E-05 | 5.312E-05 | 5.825E-03 | 2.418E-02 | 1.645E-05 | 5.312E-05 |
| 251 | Development_Growth hormone signaling via STATs and PLC/IP3                                         | 1.702E-05 | 5.479E-05 | 5.936E-01 | 6.565E-01 | 1.702E-05 | 5.479E-05 |
| 252 | Immune response_C3a signaling                                                                      | 1.801E-05 | 5.776E-05 | 1.216E-01 | 2.208E-01 | 1.801E-05 | 5.776E-05 |
| 253 | Immune response_IL-16 signaling pathway                                                            | 1.872E-05 | 5.984E-05 | 1.629E-01 | 2.733E-01 | 1.872E-05 | 5.984E-05 |
| 254 | Cell adhesion_Integrin inside-out signaling in neutrophils                                         | 1.902E-05 | 6.059E-05 | 1.326E-02 | 4.414E-02 | 1.902E-05 | 6.059E-05 |
| 255 | Cytoskeleton remodeling_Role of PDGFs in cell migration                                            | 2.018E-05 | 6.405E-05 | 2.201E-02 | 6.399E-02 | 2.018E-05 | 6.405E-05 |

|     |                                                                                                           |           |           |           |           |           |           |
|-----|-----------------------------------------------------------------------------------------------------------|-----------|-----------|-----------|-----------|-----------|-----------|
| 256 | Immune response_IL-4-responsive genes in type 2 immunity                                                  | 2.102E-05 | 6.628E-05 | 8.353E-01 | 8.505E-01 | 2.102E-05 | 6.628E-05 |
| 257 | Target_metanalisi_Stat-sign                                                                               | 2.182E-05 | 6.857E-05 | 1.160E-03 | 7.750E-03 | 2.182E-05 | 6.857E-05 |
| 258 | Androgen receptor activation and downstream signaling in Prostate cancer                                  | 2.250E-05 | 7.045E-05 | 1.886E-03 | 1.109E-02 | 2.250E-05 | 7.045E-05 |
| 259 | Immune response_Differentiation of natural regulatory T cells                                             | 2.280E-05 | 2.666E-04 | 2.280E-05 | 5.571E-04 | 1.024E-04 | 2.666E-04 |
| 260 | Development_Adenosine A3 receptor signaling                                                               | 2.295E-05 | 7.144E-05 | 1.272E-01 | 2.272E-01 | 2.295E-05 | 7.144E-05 |
| 261 | Immune response_IL-22 signaling pathway                                                                   | 2.297E-05 | 7.144E-05 | 1.999E-03 | 1.141E-02 | 2.297E-05 | 7.144E-05 |
| 262 | Development_G-CSF-induced myeloid differentiation                                                         | 2.313E-05 | 7.170E-05 | 8.554E-04 | 6.251E-03 | 2.313E-05 | 7.170E-05 |
| 263 | Development_ACM2 and ACM4 activation of ERK                                                               | 2.718E-05 | 8.343E-05 | 6.693E-01 | 7.111E-01 | 2.718E-05 | 8.343E-05 |
| 264 | Immune response_Substance P-stimulated expression of proinflammatory cytokines via MAPKs                  | 2.718E-05 | 8.343E-05 | 2.979E-01 | 4.182E-01 | 2.718E-05 | 8.343E-05 |
| 265 | Immune response_HTR2A-induced activation of cPLA2                                                         | 2.718E-05 | 8.343E-05 | 6.693E-01 | 7.111E-01 | 2.718E-05 | 8.343E-05 |
| 266 | Neurophysiological process_Constitutive and regulated NMDA receptor trafficking                           | 2.761E-05 | 8.448E-05 | 8.077E-01 | 8.289E-01 | 2.761E-05 | 8.448E-05 |
| 267 | Cytoskeleton remodeling_Integrin outside-in signaling                                                     | 2.816E-05 | 2.830E-04 | 2.816E-05 | 6.293E-04 | 1.105E-04 | 2.830E-04 |
| 268 | Modulation of tumor response to cytotoxic T cells by hypoxia in tumors                                    | 2.904E-05 | 8.827E-05 | 3.743E-02 | 9.413E-02 | 2.904E-05 | 8.827E-05 |
| 269 | Development_TGF-beta receptor signaling                                                                   | 2.904E-05 | 8.827E-05 | 2.448E-04 | 2.815E-03 | 2.904E-05 | 8.827E-05 |
| 270 | Resolution of inflammation in healing myocardial infarction                                               | 2.957E-05 | 8.899E-05 | 4.742E-01 | 5.713E-01 | 2.957E-05 | 8.899E-05 |
| 271 | Development_Angiotensin signaling via beta-Arrestin                                                       | 2.957E-05 | 8.899E-05 | 4.742E-01 | 5.713E-01 | 2.957E-05 | 8.899E-05 |
| 272 | Transcription_Transcription regulation of aminoacid metabolism                                            | 2.957E-05 | 8.899E-05 | 4.742E-01 | 5.713E-01 | 2.957E-05 | 8.899E-05 |
| 273 | Cell adhesion_Role of tetraspanins in the integrin-mediated cell adhesion                                 | 3.063E-05 | 9.129E-05 | 2.265E-03 | 1.213E-02 | 3.063E-05 | 9.129E-05 |
| 274 | Immune response_Generation of memory CD4+ T cells                                                         | 3.063E-05 | 9.129E-05 | 3.342E-05 | 7.260E-04 | 3.063E-05 | 9.129E-05 |
| 275 | Role of red blood cell adhesion to endothelium in vaso-occlusion in Sickle cell disease                   | 3.063E-05 | 9.129E-05 | 6.659E-02 | 1.450E-01 | 3.063E-05 | 9.129E-05 |
| 276 | IL-1 beta-dependent CFTR expression                                                                       | 3.200E-05 | 9.509E-05 | 5.494E-01 | 6.309E-01 | 3.200E-05 | 9.509E-05 |
| 277 | Immune response_CD40 signaling                                                                            | 3.360E-05 | 9.951E-05 | 5.936E-03 | 2.418E-02 | 3.360E-05 | 9.951E-05 |
| 278 | Development_FGF2-dependent induction of EMT                                                               | 3.414E-05 | 1.008E-04 | 9.024E-02 | 1.809E-01 | 3.414E-05 | 1.008E-04 |
| 279 | K-RAS signaling in pancreatic cancer                                                                      | 3.501E-05 | 1.027E-04 | 3.073E-01 | 4.245E-01 | 3.501E-05 | 1.027E-04 |
| 280 | Development_Activation of Erk by ACM1, ACM3 and ACM5                                                      | 3.501E-05 | 1.027E-04 | 3.073E-01 | 4.245E-01 | 3.501E-05 | 1.027E-04 |
| 281 | Hyaluronic acid/ CD44 signaling in cancer                                                                 | 3.579E-05 | 1.043E-04 | 1.817E-01 | 2.960E-01 | 3.579E-05 | 1.043E-04 |
| 282 | Cell adhesion_Integrin inside-out signaling                                                               | 3.579E-05 | 1.043E-04 | 3.369E-03 | 1.597E-02 | 3.579E-05 | 1.043E-04 |
| 283 | Transcription_Role of AP-1 in regulation of cellular metabolism                                           | 4.009E-05 | 8.038E-04 | 4.009E-05 | 8.038E-04 | 4.279E-03 | 7.428E-03 |
| 284 | Immune response_IL-7 signaling in T lymphocytes                                                           | 4.039E-05 | 1.170E-04 | 2.555E-03 | 1.305E-02 | 4.039E-05 | 1.170E-04 |
| 285 | Substance P-mediated inflammation and pain in Sickle cell disease                                         | 4.039E-05 | 1.170E-04 | 6.238E-01 | 6.804E-01 | 4.039E-05 | 1.170E-04 |
| 286 | Signal transduction_ERK1/2 signaling pathway                                                              | 4.364E-05 | 1.257E-04 | 1.943E-01 | 3.105E-01 | 4.364E-05 | 1.257E-04 |
| 287 | Signal transduction_mTORC1 upstream signaling                                                             | 4.373E-05 | 1.257E-04 | 3.945E-02 | 9.814E-02 | 4.373E-05 | 1.257E-04 |
| 288 | Cell adhesion_Histamine H1 receptor signaling in the interruption of cell barrier integrity               | 4.472E-05 | 1.272E-04 | 2.669E-02 | 7.454E-02 | 4.472E-05 | 1.272E-04 |
| 289 | Development_Membrane-bound ESR1: interaction with growth factors signaling                                | 4.472E-05 | 1.272E-04 | 2.669E-02 | 7.454E-02 | 4.472E-05 | 1.272E-04 |
| 290 | Development_Growth factors in regulation of oligodendrocyte precursor cell proliferation                  | 4.909E-05 | 1.392E-04 | 6.878E-03 | 2.650E-02 | 4.909E-05 | 1.392E-04 |
| 291 | Development_ERBB-family signaling                                                                         | 5.273E-05 | 1.486E-04 | 7.553E-02 | 1.583E-01 | 5.273E-05 | 1.486E-04 |
| 292 | Immune response_TSLP signalling                                                                           | 5.273E-05 | 1.486E-04 | 1.657E-02 | 5.253E-02 | 5.273E-05 | 1.486E-04 |
| 293 | Immune response_LTBR1 signaling                                                                           | 5.365E-05 | 1.507E-04 | 1.946E-01 | 3.105E-01 | 5.365E-05 | 1.507E-04 |
| 294 | Translation_Regulation of EIF4F activity                                                                  | 5.656E-05 | 1.573E-04 | 2.123E-03 | 1.145E-02 | 5.656E-05 | 1.573E-04 |
| 295 | Development_Role of HDAC and calcium/calmodulin-dependent kinase (CaMK) in control of skeletal myogenesis | 5.656E-05 | 1.573E-04 | 1.507E-01 | 2.567E-01 | 5.656E-05 | 1.573E-04 |
| 296 | Development_G-protein-mediated regulation of MAPK-ERK signaling                                           | 5.668E-05 | 1.573E-04 | 1.106E-01 | 2.074E-01 | 5.668E-05 | 1.573E-04 |
| 297 | Immune response_Th1 and Th2 cell differentiation                                                          | 5.671E-05 | 1.864E-04 | 5.671E-05 | 1.008E-03 | 6.816E-05 | 1.864E-04 |
| 298 | G-protein signaling_N-RAS regulation pathway                                                              | 5.871E-05 | 1.615E-04 | 5.721E-01 | 6.446E-01 | 5.871E-05 | 1.615E-04 |

|     |                                                                                                          |           |           |           |           |           |           |
|-----|----------------------------------------------------------------------------------------------------------|-----------|-----------|-----------|-----------|-----------|-----------|
| 299 | Immune response_ETV3 affect on CSF1-promoted macrophage differentiation                                  | 5.871E-05 | 1.615E-04 | 2.036E-01 | 3.196E-01 | 5.871E-05 | 1.615E-04 |
| 300 | Chemotaxis_CCL19- and CCL21-mediated chemotaxis                                                          | 5.871E-05 | 1.615E-04 | 2.036E-01 | 3.196E-01 | 5.871E-05 | 1.615E-04 |
| 301 | Transcription_Role of VDR in regulation of genes involved in osteoporosis                                | 6.520E-05 | 1.788E-04 | 4.340E-03 | 1.973E-02 | 6.520E-05 | 1.788E-04 |
| 302 | Immune response_NF-AT signaling and leukocyte interactions                                               | 7.131E-05 | 1.939E-04 | 6.491E-03 | 2.551E-02 | 7.131E-05 | 1.939E-04 |
| 303 | Development_PIP3 signaling in cardiac myocytes                                                           | 7.131E-05 | 1.939E-04 | 6.491E-03 | 2.551E-02 | 7.131E-05 | 1.939E-04 |
| 304 | Development_Thrombopoietin signaling via JAK-STAT pathway                                                | 7.635E-05 | 2.070E-04 | 2.061E-03 | 1.145E-02 | 7.635E-05 | 2.070E-04 |
| 305 | Signal transduction_PTMs in BAFF-induced non-canonical NF-kB signaling                                   | 7.798E-05 | 2.101E-04 | 1.031E-02 | 3.647E-02 | 7.798E-05 | 2.101E-04 |
| 306 | G-protein signaling_G-Protein beta/gamma signaling cascades                                              | 7.798E-05 | 2.101E-04 | 5.416E-02 | 1.249E-01 | 7.798E-05 | 2.101E-04 |
| 307 | Development_Delta-type opioid receptor signaling via G-protein alpha-14                                  | 8.252E-05 | 2.211E-04 | 1.578E-01 | 2.665E-01 | 8.252E-05 | 2.211E-04 |
| 308 | Development_Thrombospondin-1 signaling                                                                   | 8.252E-05 | 2.211E-04 | 5.133E-01 | 6.081E-01 | 8.252E-05 | 2.211E-04 |
| 309 | Immune response_T cell co-signaling receptors, schema                                                    | 8.557E-05 | 2.279E-04 | 1.250E-02 | 4.206E-02 | 8.557E-05 | 2.279E-04 |
| 310 | Aberrant B-Raf signaling in melanoma progression                                                         | 8.557E-05 | 2.279E-04 | 4.084E-01 | 5.201E-01 | 8.557E-05 | 2.279E-04 |
| 311 | DeltaF508-CFTR traffic / ER-to-Golgi in CF                                                               | 8.662E-05 | 2.293E-04 | 3.540E-01 | 4.692E-01 | 8.662E-05 | 2.293E-04 |
| 312 | wtCFTR traffic / ER-to-Golgi (normal)                                                                    | 8.662E-05 | 2.293E-04 | 3.540E-01 | 4.692E-01 | 8.662E-05 | 2.293E-04 |
| 313 | Breast cancer (general schema)                                                                           | 8.730E-05 | 2.293E-04 | 1.961E-02 | 5.947E-02 | 8.730E-05 | 2.293E-04 |
| 314 | Neurophysiological process_Netrin-1 in regulation of axon guidance                                       | 8.730E-05 | 2.293E-04 | 8.497E-02 | 1.744E-01 | 8.730E-05 | 2.293E-04 |
| 315 | Development_Neurotrophin family signaling                                                                | 8.730E-05 | 2.293E-04 | 5.357E-04 | 4.604E-03 | 8.730E-05 | 2.293E-04 |
| 316 | Oxidative stress_Angiotensin II-induced production of ROS                                                | 1.024E-04 | 2.666E-04 | 2.223E-01 | 3.382E-01 | 1.024E-04 | 2.666E-04 |
| 317 | NALP3 inflammasome activation in age-related macular degeneration (AMD)                                  | 1.024E-04 | 2.666E-04 | 2.223E-01 | 3.382E-01 | 1.024E-04 | 2.666E-04 |
| 318 | Development_Keratinocyte differentiation                                                                 | 1.044E-04 | 2.710E-04 | 5.316E-02 | 1.248E-01 | 1.044E-04 | 2.710E-04 |
| 319 | Cytoskeleton remodeling_Reverse signaling by ephrin B                                                    | 1.085E-04 | 1.601E-03 | 1.085E-04 | 1.601E-03 | 4.926E-03 | 8.487E-03 |
| 320 | Alternative complement cascade disruption in age-related macular degeneration                            | 1.085E-04 | 1.601E-03 | 1.085E-04 | 1.601E-03 | 1.069E-03 | 2.154E-03 |
| 321 | Proteolysis_Putative ubiquitin pathway                                                                   | 1.099E-04 | 2.830E-04 | 4.464E-01 | 5.550E-01 | 1.099E-04 | 2.830E-04 |
| 322 | Development_EGFR signaling via PIP3                                                                      | 1.099E-04 | 2.830E-04 | 2.446E-03 | 1.293E-02 | 1.099E-04 | 2.830E-04 |
| 323 | Transcription_N-CoR/ SMRT complex-mediated epigenetic gene silencing                                     | 1.105E-04 | 2.830E-04 | 3.511E-02 | 9.033E-02 | 1.105E-04 | 2.830E-04 |
| 324 | Role and regulation of Prostaglandin E2 in gastric cancer                                                | 1.105E-04 | 2.830E-04 | 1.272E-01 | 2.272E-01 | 1.105E-04 | 2.830E-04 |
| 325 | Apoptosis and survival_Anti-apoptotic TNFs/NF-kB/Bcl-2 pathway                                           | 1.109E-04 | 2.831E-04 | 6.119E-04 | 5.037E-03 | 1.109E-04 | 2.831E-04 |
| 326 | Neurophysiological process_NMDA-dependent postsynaptic long-term potentiation in CA1 hippocampal neurons | 1.178E-04 | 3.000E-04 | 6.062E-01 | 6.676E-01 | 1.178E-04 | 3.000E-04 |
| 327 | Immune response_IL-5 signaling via JAK/STAT                                                              | 1.266E-04 | 3.216E-04 | 5.609E-02 | 1.286E-01 | 1.266E-04 | 3.216E-04 |
| 328 | Immune response_IL-12-induced IFN-gamma production                                                       | 1.329E-04 | 3.364E-04 | 1.258E-02 | 4.206E-02 | 1.329E-04 | 3.364E-04 |
| 329 | Multiple myeloma (general schema)                                                                        | 1.332E-04 | 3.364E-04 | 7.508E-02 | 1.583E-01 | 1.332E-04 | 3.364E-04 |
| 330 | Signal transduction_AKT signaling                                                                        | 1.396E-04 | 3.498E-04 | 6.963E-04 | 5.556E-03 | 1.396E-04 | 3.498E-04 |
| 331 | Regulation of Tissue factor signaling in cancer                                                          | 1.396E-04 | 3.498E-04 | 2.979E-01 | 4.182E-01 | 1.396E-04 | 3.498E-04 |
| 332 | Apoptosis and survival_TNF-alpha-induced Caspase-8 signaling                                             | 1.396E-04 | 3.498E-04 | 9.489E-02 | 1.879E-01 | 1.396E-04 | 3.498E-04 |
| 333 | Development_Slit-Robo signaling                                                                          | 1.504E-04 | 3.739E-04 | 8.554E-04 | 6.251E-03 | 1.504E-04 | 3.739E-04 |
| 334 | Inter-cellular relations in COPD (general schema)                                                        | 1.504E-04 | 3.739E-04 | 6.590E-03 | 2.551E-02 | 1.504E-04 | 3.739E-04 |
| 335 | Immune response_IL-27 signaling pathway                                                                  | 1.548E-04 | 3.826E-04 | 2.201E-02 | 6.399E-02 | 1.548E-04 | 3.826E-04 |
| 336 | G-protein signaling_M-RAS regulation pathway                                                             | 1.548E-04 | 3.826E-04 | 4.605E-01 | 5.635E-01 | 1.548E-04 | 3.826E-04 |
| 337 | Immune response_Antigen presentation by MHC class II                                                     | 1.704E-04 | 2.149E-03 | 1.704E-04 | 2.149E-03 | 4.735E-02 | 6.795E-02 |
| 338 | Development_Beta adrenergic receptors in brown adipocyte differentiation                                 | 1.708E-04 | 4.188E-04 | 6.659E-02 | 1.450E-01 | 1.708E-04 | 4.188E-04 |
| 339 | G-protein signaling_H-RAS regulation pathway                                                             | 1.708E-04 | 4.188E-04 | 2.411E-01 | 3.585E-01 | 1.708E-04 | 4.188E-04 |
| 340 | Immune response_IL-13 signaling via JAK-STAT                                                             | 1.745E-04 | 4.245E-04 | 1.000E-01 | 1.936E-01 | 1.745E-04 | 4.245E-04 |
| 341 | Immune response_CRT2 signaling in Th2 cells                                                              | 1.745E-04 | 4.245E-04 | 3.073E-01 | 4.245E-01 | 1.745E-04 | 4.245E-04 |

|     |                                                                                          |           |           |           |           |           |           |
|-----|------------------------------------------------------------------------------------------|-----------|-----------|-----------|-----------|-----------|-----------|
| 342 | Development_S1P1 signaling pathway                                                       | 1.745E-04 | 4.245E-04 | 1.000E-01 | 1.936E-01 | 1.745E-04 | 4.245E-04 |
| 343 | LRRK2 and immune function in Parkinson's disease                                         | 1.866E-04 | 2.280E-03 | 1.866E-04 | 2.280E-03 | 3.349E-03 | 5.971E-03 |
| 344 | Ligand-independent activation of Androgen receptor in Prostate Cancer                    | 1.910E-04 | 4.636E-04 | 2.748E-04 | 2.934E-03 | 1.910E-04 | 4.636E-04 |
| 345 | Development_Activation of ERK by Kappa-type opioid receptor                              | 1.989E-04 | 4.801E-04 | 5.494E-01 | 6.309E-01 | 1.989E-04 | 4.801E-04 |
| 346 | Development_Transactivation of PDGFR in non-neuronal cells by Dopamine D2 receptor       | 1.989E-04 | 4.801E-04 | 1.850E-01 | 2.996E-01 | 1.989E-04 | 4.801E-04 |
| 347 | Development_Glucocorticoid receptor signaling                                            | 2.137E-04 | 5.118E-04 | 3.537E-04 | 3.505E-03 | 2.137E-04 | 5.118E-04 |
| 348 | G-protein signaling_TC21 regulation pathway                                              | 2.137E-04 | 5.118E-04 | 4.742E-01 | 5.713E-01 | 2.137E-04 | 5.118E-04 |
| 349 | G-protein signaling_R-RAS regulation pathway                                             | 2.137E-04 | 5.118E-04 | 1.314E-01 | 2.304E-01 | 2.137E-04 | 5.118E-04 |
| 350 | Development_Activation of ERK by Alpha-1 adrenergic receptors                            | 2.165E-04 | 5.140E-04 | 6.859E-01 | 7.258E-01 | 2.165E-04 | 5.140E-04 |
| 351 | Cell adhesion_Ephrin signaling                                                           | 2.165E-04 | 5.140E-04 | 1.053E-01 | 2.022E-01 | 2.165E-04 | 5.140E-04 |
| 352 | Role of alpha-6/beta-4 integrins in carcinoma progression                                | 2.165E-04 | 5.140E-04 | 2.669E-02 | 7.454E-02 | 2.165E-04 | 5.140E-04 |
| 353 | G-protein signaling_G-Protein alpha-12 signaling pathway                                 | 2.173E-04 | 5.140E-04 | 1.516E-02 | 4.900E-02 | 2.173E-04 | 5.140E-04 |
| 354 | Signal transduction_Cyclic AMP signaling                                                 | 2.173E-04 | 5.140E-04 | 6.238E-01 | 6.804E-01 | 2.173E-04 | 5.140E-04 |
| 355 | Development_TGF-beta-dependent induction of EMT via SMADs                                | 2.196E-04 | 2.592E-03 | 2.196E-04 | 2.592E-03 | 2.483E-03 | 4.594E-03 |
| 356 | Nociception_Nociceptin receptor signaling                                                | 2.227E-04 | 5.253E-04 | 4.347E-02 | 1.056E-01 | 2.227E-04 | 5.253E-04 |
| 357 | Translation_Translation regulation by Alpha-1 adrenergic receptors                       | 2.463E-04 | 5.795E-04 | 3.904E-01 | 5.030E-01 | 2.463E-04 | 5.795E-04 |
| 358 | Putative pathways for stimulation of fat cell differentiation by Bisphenol A             | 2.596E-04 | 6.093E-04 | 4.656E-02 | 1.117E-01 | 2.596E-04 | 6.093E-04 |
| 359 | High shear stress-induced platelet activation                                            | 2.667E-04 | 6.150E-04 | 1.106E-01 | 2.074E-01 | 2.667E-04 | 6.150E-04 |
| 360 | Chemotaxis_Lipoxin inhibitory action on Formyl-Met-Leu-Phe-induced neutrophil chemotaxis | 2.667E-04 | 6.150E-04 | 5.920E-03 | 2.418E-02 | 2.667E-04 | 6.150E-04 |
| 361 | Development_Angiotensin activation of Akt                                                | 2.667E-04 | 6.150E-04 | 3.260E-01 | 4.442E-01 | 2.667E-04 | 6.150E-04 |
| 362 | Neurophysiological process_ACM regulation of nerve impulse                               | 2.667E-04 | 6.150E-04 | 6.939E-01 | 7.333E-01 | 2.667E-04 | 6.150E-04 |
| 363 | Regulation of GSK3 beta in bipolar disorder                                              | 2.667E-04 | 6.150E-04 | 3.260E-01 | 4.442E-01 | 2.667E-04 | 6.150E-04 |
| 364 | Signal transduction_Calcium signaling                                                    | 2.667E-04 | 6.150E-04 | 1.106E-01 | 2.074E-01 | 2.667E-04 | 6.150E-04 |
| 365 | Cell adhesion_PLAU signaling                                                             | 2.741E-04 | 6.290E-04 | 7.553E-02 | 1.583E-01 | 2.741E-04 | 6.290E-04 |
| 366 | Immune response_Differentiation and clonal expansion of CD8+ T cells                     | 2.741E-04 | 6.290E-04 | 4.056E-04 | 3.731E-03 | 2.741E-04 | 6.290E-04 |
| 367 | Development_TGF-beta-induction of EMT via ROS                                            | 2.864E-04 | 6.556E-04 | 9.024E-02 | 1.809E-01 | 2.864E-04 | 6.556E-04 |
| 368 | G-protein signaling_Ras family GTPases in kinase cascades (schema)                       | 2.898E-04 | 6.601E-04 | 4.289E-04 | 3.900E-03 | 2.898E-04 | 6.601E-04 |
| 369 | Development_Hedgehog signaling                                                           | 3.264E-04 | 7.379E-04 | 1.160E-01 | 2.125E-01 | 3.264E-04 | 7.379E-04 |
| 370 | Development_Leptin signaling via PI3K-dependent pathway                                  | 3.264E-04 | 7.379E-04 | 1.160E-01 | 2.125E-01 | 3.264E-04 | 7.379E-04 |
| 371 | Development_Angiotensin activation of ERK                                                | 3.350E-04 | 7.537E-04 | 5.721E-01 | 6.446E-01 | 3.350E-04 | 7.537E-04 |
| 372 | Cytoskeleton remodeling_Thyroliberin in cytoskeleton remodeling                          | 3.350E-04 | 7.537E-04 | 5.721E-01 | 6.446E-01 | 3.350E-04 | 7.537E-04 |
| 373 | Development_Role of Activin A in cell differentiation and proliferation                  | 3.428E-04 | 7.675E-04 | 8.019E-02 | 1.677E-01 | 3.428E-04 | 7.675E-04 |
| 374 | Apoptosis and survival_Ceramides signaling pathway                                       | 3.428E-04 | 7.675E-04 | 2.695E-01 | 3.888E-01 | 3.428E-04 | 7.675E-04 |
| 375 | PGE2 pathways in cancer                                                                  | 3.557E-04 | 7.945E-04 | 1.629E-01 | 2.733E-01 | 3.557E-04 | 7.945E-04 |
| 376 | Transport_Clathrin-coated vesicle cycle                                                  | 3.615E-04 | 8.055E-04 | 2.075E-03 | 1.145E-02 | 3.615E-04 | 8.055E-04 |
| 377 | Neurophysiological process_Activity-dependent synaptic AMPA receptor removal             | 3.658E-04 | 8.133E-04 | 2.148E-02 | 6.339E-02 | 3.658E-04 | 8.133E-04 |
| 378 | Apoptosis and survival_Anti-apoptotic TNFs/NF-kB/IAP pathway                             | 3.867E-04 | 8.555E-04 | 1.489E-01 | 2.553E-01 | 3.867E-04 | 8.555E-04 |
| 379 | HCV-dependent regulation of membrane receptors signaling in HCC                          | 3.867E-04 | 8.555E-04 | 3.010E-02 | 8.200E-02 | 3.867E-04 | 8.555E-04 |
| 380 | Multiple sclerosis (general schema)                                                      | 4.038E-04 | 8.911E-04 | 9.813E-02 | 1.918E-01 | 4.038E-04 | 8.911E-04 |
| 381 | Airway smooth muscle contraction in asthma                                               | 4.242E-04 | 9.216E-04 | 7.635E-01 | 7.929E-01 | 4.242E-04 | 9.216E-04 |
| 382 | Muscle contraction_ACM regulation of smooth muscle contraction                           | 4.242E-04 | 9.216E-04 | 7.635E-01 | 7.929E-01 | 4.242E-04 | 9.216E-04 |
| 383 | Development_Growth hormone-releasing hormone (GH-RH) signaling                           | 4.252E-04 | 9.216E-04 | 2.790E-01 | 4.003E-01 | 4.252E-04 | 9.216E-04 |
| 384 | TLR2-induced platelet activation                                                         | 4.252E-04 | 9.216E-04 | 2.790E-01 | 4.003E-01 | 4.252E-04 | 9.216E-04 |

|     |                                                                                                       |           |           |           |           |           |           |
|-----|-------------------------------------------------------------------------------------------------------|-----------|-----------|-----------|-----------|-----------|-----------|
| 385 | Possible pathway of TGF-beta 1-dependent inhibition of CFTR expression                                | 4.252E-04 | 9.216E-04 | 8.497E-02 | 1.744E-01 | 4.252E-04 | 9.216E-04 |
| 386 | Development_CNTF receptor signaling                                                                   | 4.275E-04 | 9.216E-04 | 2.129E-01 | 3.277E-01 | 4.275E-04 | 9.216E-04 |
| 387 | Apoptosis and survival_Role of CDK5 in neuronal death and survival                                    | 4.275E-04 | 9.216E-04 | 1.538E-03 | 9.620E-03 | 4.275E-04 | 9.216E-04 |
| 388 | Oxidative stress_ROS-mediated activation of MAPK via inhibition of phosphatases                       | 4.275E-04 | 9.216E-04 | 5.830E-01 | 6.494E-01 | 4.275E-04 | 9.216E-04 |
| 389 | Development_Role of CDK5 in neuronal development                                                      | 4.275E-04 | 9.216E-04 | 1.031E-02 | 3.647E-02 | 4.275E-04 | 9.216E-04 |
| 390 | Development_Role of CNTF and LIF in regulation of oligodendrocyte development                         | 5.084E-04 | 1.093E-03 | 5.133E-01 | 6.081E-01 | 5.084E-04 | 1.093E-03 |
| 391 | Translation_Non-genomic (rapid) action of Androgen Receptor                                           | 5.234E-04 | 1.123E-03 | 2.126E-02 | 6.321E-02 | 5.234E-04 | 1.123E-03 |
| 392 | Altered Ca2+ handling in heart failure                                                                | 5.401E-04 | 1.154E-03 | 5.936E-01 | 6.565E-01 | 5.401E-04 | 1.154E-03 |
| 393 | Development_Transcriptional regulation of megakaryopoiesis                                            | 5.401E-04 | 1.154E-03 | 1.757E-03 | 1.049E-02 | 5.401E-04 | 1.154E-03 |
| 394 | Expression targets of Tissue factor signaling in cancer                                               | 5.565E-04 | 1.183E-03 | 4.320E-01 | 5.405E-01 | 5.565E-04 | 1.183E-03 |
| 395 | Immune response_IL-15 signaling via JAK-STAT cascade                                                  | 5.565E-04 | 1.183E-03 | 1.062E-01 | 2.026E-01 | 5.565E-04 | 1.183E-03 |
| 396 | Development_EDNRB signaling                                                                           | 5.767E-04 | 1.223E-03 | 3.631E-01 | 4.773E-01 | 5.767E-04 | 1.223E-03 |
| 397 | Immune response_Reactive oxygen species (ROS) in IL-4 signaling                                       | 5.876E-04 | 1.244E-03 | 8.613E-02 | 1.758E-01 | 5.876E-04 | 1.244E-03 |
| 398 | Immune response_IL-7 signaling in B lymphocytes                                                       | 6.397E-04 | 1.345E-03 | 6.963E-04 | 5.556E-03 | 6.397E-04 | 1.345E-03 |
| 399 | Nicotine signaling in dopaminergic neurons, Pt. 2 - axon terminal                                     | 6.397E-04 | 1.345E-03 | 6.693E-01 | 7.111E-01 | 6.397E-04 | 1.345E-03 |
| 400 | Apoptosis and survival_TNFR1 signaling pathway                                                        | 6.397E-04 | 1.345E-03 | 2.979E-01 | 4.182E-01 | 6.397E-04 | 1.345E-03 |
| 401 | Proteolysis_Putative SUMO-1 pathway                                                                   | 6.593E-04 | 1.380E-03 | 3.624E-02 | 9.231E-02 | 6.593E-04 | 1.380E-03 |
| 402 | Immune response_Delta-type opioid receptor signaling in T-cells                                       | 6.593E-04 | 1.380E-03 | 5.825E-03 | 2.418E-02 | 6.593E-04 | 1.380E-03 |
| 403 | Development_Lipoxin inhibitory action on PDGF, EGF and LTD4 signaling                                 | 6.758E-04 | 1.411E-03 | 2.317E-01 | 3.478E-01 | 6.758E-04 | 1.411E-03 |
| 404 | Neurophysiological process_Constitutive and activity-dependent synaptic AMPA receptor delivery        | 7.001E-04 | 1.458E-03 | 6.218E-02 | 1.380E-01 | 7.001E-04 | 1.458E-03 |
| 405 | DNA damage_Role of SUMO in p53 regulation                                                             | 7.410E-04 | 5.738E-03 | 7.410E-04 | 5.738E-03 | 2.772E-02 | 4.183E-02 |
| 406 | Immune response_IL-12 signaling pathway                                                               | 7.519E-04 | 1.559E-03 | 1.144E-01 | 2.121E-01 | 7.519E-04 | 1.559E-03 |
| 407 | Cytoskeleton remodeling_Regulation of actin cytoskeleton by Rho GTPases                               | 7.519E-04 | 1.559E-03 | 1.962E-02 | 5.947E-02 | 7.519E-04 | 1.559E-03 |
| 408 | Aberrant lipid trafficking and metabolism in age-related macular degeneration pathogenesis            | 7.631E-04 | 5.850E-03 | 7.631E-04 | 5.850E-03 | 5.800E-02 | 8.158E-02 |
| 409 | Apoptosis and survival_FAS signaling cascades                                                         | 7.765E-04 | 1.607E-03 | 3.073E-01 | 4.245E-01 | 7.765E-04 | 1.607E-03 |
| 410 | Development_Beta-adrenergic receptors signaling via Cyclic AMP                                        | 8.199E-04 | 1.693E-03 | 7.378E-01 | 7.714E-01 | 8.199E-04 | 1.693E-03 |
| 411 | Cytoskeleton remodeling_Ra1A regulation pathway                                                       | 8.554E-04 | 6.251E-03 | 8.554E-04 | 6.251E-03 | 1.649E-02 | 2.583E-02 |
| 412 | Neurophysiological process_Receptor-mediated axon growth repulsion                                    | 9.365E-04 | 1.921E-03 | 1.053E-01 | 2.022E-01 | 9.365E-04 | 1.921E-03 |
| 413 | Cell adhesion_ECM remodeling                                                                          | 9.701E-04 | 1.981E-03 | 1.074E-02 | 3.734E-02 | 9.701E-04 | 1.981E-03 |
| 414 | Development_Differentiation of white adipocytes                                                       | 9.701E-04 | 1.981E-03 | 2.123E-03 | 1.145E-02 | 9.701E-04 | 1.981E-03 |
| 415 | Signal transduction_PTEN pathway                                                                      | 1.004E-03 | 2.257E-03 | 1.004E-03 | 6.827E-03 | 1.123E-03 | 2.257E-03 |
| 416 | Role of Endothelin-1 in inflammation and vasoconstriction in Sickle cell disease                      | 1.031E-03 | 2.100E-03 | 2.506E-01 | 3.676E-01 | 1.031E-03 | 2.100E-03 |
| 417 | Development_Positive regulation of STK3/4 (Hippo) pathway and negative regulation of YAP/TAZ function | 1.051E-03 | 2.137E-03 | 2.616E-01 | 3.803E-01 | 1.051E-03 | 2.137E-03 |
| 418 | Development_Role of proteases in hematopoietic stem cell mobilization                                 | 1.062E-03 | 2.154E-03 | 9.920E-03 | 3.579E-02 | 1.062E-03 | 2.154E-03 |
| 419 | Apoptosis and survival_Role of IAP-proteins in apoptosis                                              | 1.069E-03 | 2.154E-03 | 5.494E-01 | 6.309E-01 | 1.069E-03 | 2.154E-03 |
| 420 | Influence of low doses of Arsenite on glucose uptake in adipocytes                                    | 1.069E-03 | 2.154E-03 | 4.297E-02 | 1.047E-01 | 1.069E-03 | 2.154E-03 |
| 421 | Impaired inhibitory action of lipoxins on ROS production in neutrophils in CF                         | 1.142E-03 | 2.292E-03 | 3.994E-01 | 5.129E-01 | 1.142E-03 | 2.292E-03 |
| 422 | Blood coagulation_GPCRs in platelet aggregation                                                       | 1.206E-03 | 2.414E-03 | 3.386E-02 | 8.827E-02 | 1.206E-03 | 2.414E-03 |
| 423 | Cell adhesion_Role of CDK5 in cell adhesion                                                           | 1.209E-03 | 8.011E-03 | 1.209E-03 | 8.011E-03 | 2.117E-02 | 3.265E-02 |
| 424 | Transcription_PPAR Pathway                                                                            | 1.288E-03 | 2.573E-03 | 2.143E-01 | 3.285E-01 | 1.288E-03 | 2.573E-03 |
| 425 | Development_Leptin signaling via JAK/STAT and MAPK cascades                                           | 1.303E-03 | 2.586E-03 | 1.314E-01 | 2.304E-01 | 1.303E-03 | 2.586E-03 |
| 426 | Development_Signaling of Beta-adrenergic receptors via Beta-arrestins                                 | 1.303E-03 | 2.586E-03 | 4.742E-01 | 5.713E-01 | 1.303E-03 | 2.586E-03 |
| 427 | Putative pathways of hormone action in neurofibromatosis type 1                                       | 1.303E-03 | 2.586E-03 | 2.455E-02 | 7.008E-02 | 1.303E-03 | 2.586E-03 |

|     |                                                                                                                                                 |           |           |           |           |           |           |
|-----|-------------------------------------------------------------------------------------------------------------------------------------------------|-----------|-----------|-----------|-----------|-----------|-----------|
| 428 | Immune response_PGE2 common pathways                                                                                                            | 1.338E-03 | 2.613E-03 | 7.017E-01 | 7.376E-01 | 1.338E-03 | 2.613E-03 |
| 429 | Regulation of lipid metabolism_Insulin signaling: generic cascades                                                                              | 1.338E-03 | 2.613E-03 | 3.073E-02 | 8.259E-02 | 1.338E-03 | 2.613E-03 |
| 430 | Development_Beta-adrenergic receptor-induced regulation of ERK                                                                                  | 1.338E-03 | 2.613E-03 | 1.160E-01 | 2.125E-01 | 1.338E-03 | 2.613E-03 |
| 431 | Signal transduction_JNK pathway                                                                                                                 | 1.338E-03 | 2.613E-03 | 6.491E-03 | 2.551E-02 | 1.338E-03 | 2.613E-03 |
| 432 | Development_WNT5A signaling                                                                                                                     | 1.338E-03 | 2.613E-03 | 3.073E-02 | 8.259E-02 | 1.338E-03 | 2.613E-03 |
| 433 | Development_HGF signaling pathway                                                                                                               | 1.338E-03 | 2.613E-03 | 6.491E-03 | 2.551E-02 | 1.338E-03 | 2.613E-03 |
| 434 | Apoptosis and survival_Endoplasmic reticulum stress response pathway                                                                            | 1.339E-03 | 2.613E-03 | 4.084E-01 | 5.201E-01 | 1.339E-03 | 2.613E-03 |
| 435 | Tau pathology in Alzheimer disease                                                                                                              | 1.339E-03 | 2.613E-03 | 4.084E-01 | 5.201E-01 | 1.339E-03 | 2.613E-03 |
| 436 | Signal transduction_mTORC2 upstream signaling                                                                                                   | 1.353E-03 | 8.742E-03 | 1.353E-03 | 8.742E-03 | 5.942E-03 | 1.002E-02 |
| 437 | Blood coagulation_Platelet microparticle generation                                                                                             | 1.379E-03 | 2.680E-03 | 5.487E-01 | 6.309E-01 | 1.379E-03 | 2.680E-03 |
| 438 | wtCFTR and deltaF508-CFTR traffic / Clathrin coated vesicles formation (normal and CF)                                                          | 1.421E-03 | 9.033E-03 | 1.421E-03 | 9.033E-03 | 1.087E-02 | 1.750E-02 |
| 439 | Development_WNT signaling pathway. Part 1. Degradation of beta-catenin in the absence WNT signaling                                             | 1.461E-03 | 2.821E-03 | 8.255E-02 | 1.703E-01 | 1.461E-03 | 2.821E-03 |
| 440 | Translation_IL-2 regulation of translation                                                                                                      | 1.461E-03 | 2.821E-03 | 1.156E-02 | 3.979E-02 | 1.461E-03 | 2.821E-03 |
| 441 | Development_YAP/TAZ-mediated co-regulation of transcription                                                                                     | 1.563E-03 | 3.011E-03 | 2.819E-03 | 1.406E-02 | 1.563E-03 | 3.011E-03 |
| 442 | Development_Activation of astroglial cells proliferation by ACM3                                                                                | 1.660E-03 | 3.192E-03 | 2.036E-01 | 3.196E-01 | 1.660E-03 | 3.192E-03 |
| 443 | Cell adhesion_Cadherin-mediated cell adhesion                                                                                                   | 1.676E-03 | 3.217E-03 | 3.891E-03 | 1.801E-02 | 1.676E-03 | 3.217E-03 |
| 444 | Ca(2+)-dependent NF-AT signaling in cardiac hypertrophy                                                                                         | 1.816E-03 | 3.478E-03 | 7.696E-01 | 7.981E-01 | 1.816E-03 | 3.478E-03 |
| 445 | Development_Regulation of lung epithelial progenitor cell differentiation                                                                       | 1.832E-03 | 3.502E-03 | 3.586E-03 | 1.669E-02 | 1.832E-03 | 3.502E-03 |
| 446 | Immune response_Oncostatin M signaling via JAK-Stat in mouse cells                                                                              | 1.964E-03 | 3.746E-03 | 9.024E-02 | 1.809E-01 | 1.964E-03 | 3.746E-03 |
| 447 | Immune response_Sialic-acid receptors (Siglecs) signaling                                                                                       | 1.997E-03 | 3.802E-03 | 4.769E-02 | 1.130E-01 | 1.997E-03 | 3.802E-03 |
| 448 | G-protein signaling_Regulation of RAC1 activity                                                                                                 | 1.999E-03 | 5.430E-03 | 1.999E-03 | 1.141E-02 | 2.999E-03 | 5.430E-03 |
| 449 | Immune response_Inflammasome in inflammatory response                                                                                           | 2.039E-03 | 3.818E-03 | 5.830E-01 | 6.494E-01 | 2.039E-03 | 3.818E-03 |
| 450 | G-protein signaling_RhoA regulation pathway                                                                                                     | 2.039E-03 | 3.818E-03 | 5.416E-02 | 1.249E-01 | 2.039E-03 | 3.818E-03 |
| 451 | Development_S1P1 receptor signaling via beta-arrestin                                                                                           | 2.039E-03 | 3.818E-03 | 2.129E-01 | 3.277E-01 | 2.039E-03 | 3.818E-03 |
| 452 | Immune response_TLR ligands                                                                                                                     | 2.039E-03 | 3.818E-03 | 5.416E-02 | 1.249E-01 | 2.039E-03 | 3.818E-03 |
| 453 | Development_Epigenetic and transcriptional regulation of oligodendrocyte precursor cell differentiation and myelination                         | 2.039E-03 | 3.818E-03 | 2.129E-01 | 3.277E-01 | 2.039E-03 | 3.818E-03 |
| 454 | G-protein signaling_RhoA regulation pathway                                                                                                     | 2.039E-03 | 3.818E-03 | 5.416E-02 | 1.249E-01 | 2.039E-03 | 3.818E-03 |
| 455 | Apoptosis and survival_Cytoplasmic/mitochondrial transport of proapoptotic proteins Bid, Bmf and Bim                                            | 2.039E-03 | 3.818E-03 | 5.830E-01 | 6.494E-01 | 2.039E-03 | 3.818E-03 |
| 456 | Development_Role of cell-cell and ECM-cell interactions in oligodendrocyte differentiation and myelination                                      | 2.039E-03 | 3.818E-03 | 2.129E-01 | 3.277E-01 | 2.039E-03 | 3.818E-03 |
| 457 | G-protein signaling_G-Protein alpha-i signaling cascades                                                                                        | 2.127E-03 | 3.976E-03 | 1.489E-01 | 2.553E-01 | 2.127E-03 | 3.976E-03 |
| 458 | Immune response_Inhibitory action of lipoxins on superoxide production induced by IL-8 and Leukotriene B4 in neutrophils                        | 2.192E-03 | 4.080E-03 | 3.631E-01 | 4.773E-01 | 2.192E-03 | 4.080E-03 |
| 459 | Transcription_Role of the non-genomic action of Retinoic acid and phosphorylation of Retinoic acid receptors in the initiation of transcription | 2.483E-03 | 4.594E-03 | 5.817E-02 | 1.315E-01 | 2.483E-03 | 4.594E-03 |
| 460 | Oxidative stress_NOX and DUOX families of NADPH oxidases                                                                                        | 2.483E-03 | 4.594E-03 | 2.223E-01 | 3.382E-01 | 2.483E-03 | 4.594E-03 |
| 461 | Cell cycle_Regulation of G1/S transition (part 1)                                                                                               | 2.555E-03 | 1.305E-02 | 2.555E-03 | 1.305E-02 | 1.542E-02 | 2.439E-02 |
| 462 | Chemotaxis_Inhibitory action of lipoxins on IL-8- and Leukotriene B4-induced neutrophil migration                                               | 2.558E-03 | 4.724E-03 | 9.161E-03 | 3.395E-02 | 2.558E-03 | 4.724E-03 |
| 463 | Development_Role of HGF in hematopoietic stem cell mobilization                                                                                 | 2.588E-03 | 4.753E-03 | 9.813E-02 | 1.918E-01 | 2.588E-03 | 4.753E-03 |
| 464 | Transcription_Role of Akt in hypoxia induced HIF1 activation                                                                                    | 2.588E-03 | 4.753E-03 | 9.813E-02 | 1.918E-01 | 2.588E-03 | 4.753E-03 |
| 465 | Development_S1P3 receptor signaling pathway                                                                                                     | 2.599E-03 | 4.753E-03 | 9.489E-02 | 1.879E-01 | 2.599E-03 | 4.753E-03 |
| 466 | Chemotaxis_C5a-induced chemotaxis                                                                                                               | 2.599E-03 | 4.753E-03 | 9.489E-02 | 1.879E-01 | 2.599E-03 | 4.753E-03 |
| 467 | Development_Notch Signaling Pathway                                                                                                             | 2.599E-03 | 4.753E-03 | 2.979E-01 | 4.182E-01 | 2.599E-03 | 4.753E-03 |
| 468 | Development_Mu-type opioid receptor regulation of proliferation                                                                                 | 2.667E-03 | 4.857E-03 | 1.578E-01 | 2.665E-01 | 2.667E-03 | 4.857E-03 |
| 469 | Development_Regulation of CDK5 in CNS                                                                                                           | 2.667E-03 | 4.857E-03 | 3.309E-02 | 8.655E-02 | 2.667E-03 | 4.857E-03 |
| 470 | Transcription_P53 signaling pathway                                                                                                             | 2.871E-03 | 8.668E-03 | 2.871E-03 | 1.406E-02 | 5.059E-03 | 8.668E-03 |

|     |                                                                                                  |           |           |           |           |           |           |
|-----|--------------------------------------------------------------------------------------------------|-----------|-----------|-----------|-----------|-----------|-----------|
| 471 | Cell adhesion_Endothelial cell contacts by non-junctional mechanisms                             | 2.878E-03 | 1.406E-02 | 2.878E-03 | 1.406E-02 | 8.413E-02 | 1.144E-01 |
| 472 | Cell adhesion_Endothelial cell contacts by non-junctional mechanisms                             | 2.878E-03 | 1.406E-02 | 2.878E-03 | 1.406E-02 | 8.413E-02 | 1.144E-01 |
| 473 | Upregulation of MITF in melanoma                                                                 | 2.999E-03 | 5.430E-03 | 2.317E-01 | 3.478E-01 | 2.999E-03 | 5.430E-03 |
| 474 | Development_Hedgehog and PTH signaling pathways in bone and cartilage development                | 2.999E-03 | 5.430E-03 | 2.317E-01 | 3.478E-01 | 2.999E-03 | 5.430E-03 |
| 475 | Impaired Lipoxin A4 signaling in CF                                                              | 3.068E-03 | 5.533E-03 | 3.073E-01 | 4.245E-01 | 3.068E-03 | 5.533E-03 |
| 476 | Retinal ganglion cell damage in glaucoma                                                         | 3.068E-03 | 5.533E-03 | 4.887E-03 | 2.123E-02 | 3.068E-03 | 5.533E-03 |
| 477 | Apoptosis and survival_nAChR in apoptosis inhibition and cell cycle progression                  | 3.306E-03 | 5.927E-03 | 1.668E-01 | 2.769E-01 | 3.306E-03 | 5.927E-03 |
| 478 | Apoptosis and survival_p53-dependent apoptosis                                                   | 3.306E-03 | 5.927E-03 | 1.668E-01 | 2.769E-01 | 3.306E-03 | 5.927E-03 |
| 479 | Immune response_Oncostatin M signaling via JAK-Stat in human cells                               | 3.349E-03 | 5.971E-03 | 1.062E-01 | 2.026E-01 | 3.349E-03 | 5.971E-03 |
| 480 | Regulation of lipid metabolism_Regulation of lipid metabolism by niacin and isoprenaline         | 3.601E-03 | 6.395E-03 | 3.167E-01 | 4.352E-01 | 3.601E-03 | 6.395E-03 |
| 481 | Neurophysiological process_Glutamic acid regulation of Dopamine D1A receptor signaling           | 3.601E-03 | 6.395E-03 | 6.859E-01 | 7.258E-01 | 3.601E-03 | 6.395E-03 |
| 482 | Regulation of CFTR activity (normal and CF)                                                      | 3.631E-03 | 6.423E-03 | 2.076E-01 | 3.241E-01 | 3.631E-03 | 6.423E-03 |
| 483 | Development_Alpha-2 adrenergic receptor activation of ERK                                        | 3.631E-03 | 6.423E-03 | 4.689E-01 | 5.712E-01 | 3.631E-03 | 6.423E-03 |
| 484 | Regulation of AKT(PKB)/ GSK3 beta cascade in bipolar disorder                                    | 3.960E-03 | 6.992E-03 | 1.567E-01 | 2.664E-01 | 3.960E-03 | 6.992E-03 |
| 485 | Colorectal cancer (general schema)                                                               | 4.055E-03 | 7.132E-03 | 1.759E-01 | 2.877E-01 | 4.055E-03 | 7.132E-03 |
| 486 | Apoptosis and survival_Granzyme A signaling                                                      | 4.055E-03 | 7.132E-03 | 6.590E-03 | 2.551E-02 | 4.055E-03 | 7.132E-03 |
| 487 | Immune response_IL-4-induced regulators of cell growth, survival, differentiation and metabolism | 4.126E-03 | 7.217E-03 | 2.148E-02 | 6.339E-02 | 4.126E-03 | 7.217E-03 |
| 488 | Action of GSK3 beta in bipolar disorder                                                          | 4.266E-03 | 7.428E-03 | 1.144E-01 | 2.121E-01 | 4.266E-03 | 7.428E-03 |
| 489 | Apoptosis and survival_NO signaling in apoptosis                                                 | 4.266E-03 | 7.428E-03 | 4.464E-01 | 5.550E-01 | 4.266E-03 | 7.428E-03 |
| 490 | Development_Mu-type opioid receptor signaling                                                    | 4.279E-03 | 7.428E-03 | 2.506E-01 | 3.676E-01 | 4.279E-03 | 7.428E-03 |
| 491 | Transport_Alpha-2 adrenergic receptor regulation of ion channels                                 | 4.883E-03 | 8.445E-03 | 7.017E-01 | 7.376E-01 | 4.883E-03 | 8.445E-03 |
| 492 | wtCFTR and deltaF508 traffic / Membrane expression (normal and CF)                               | 4.883E-03 | 8.445E-03 | 1.160E-01 | 2.125E-01 | 4.883E-03 | 8.445E-03 |
| 493 | NETosis in SLE                                                                                   | 4.926E-03 | 8.487E-03 | 1.850E-01 | 2.996E-01 | 4.926E-03 | 8.487E-03 |
| 494 | Muscle contraction_GPCRs in the regulation of smooth muscle tone                                 | 5.044E-03 | 8.668E-03 | 6.263E-01 | 6.811E-01 | 5.044E-03 | 8.668E-03 |
| 495 | Complement pathway disruption in thrombotic microangiopathy                                      | 5.059E-03 | 8.668E-03 | 7.553E-02 | 1.583E-01 | 5.059E-03 | 8.668E-03 |
| 496 | Platelet activation as a result of endothelial dysfunction after stenting                        | 5.190E-03 | 8.860E-03 | 1.691E-01 | 2.795E-01 | 5.190E-03 | 8.860E-03 |
| 497 | Impaired inhibitory action of lipoxins on neutrophil migration in CF                             | 5.190E-03 | 8.860E-03 | 1.345E-02 | 4.439E-02 | 5.190E-03 | 8.860E-03 |
| 498 | Modification and recycling of the GABA-A and B receptors_Simona                                  | 5.278E-03 | 8.995E-03 | 8.246E-02 | 1.703E-01 | 5.278E-03 | 8.995E-03 |
| 499 | Development_Dopamine D2 receptor transactivation of EGFR                                         | 5.356E-03 | 9.109E-03 | 1.229E-01 | 2.208E-01 | 5.356E-03 | 9.109E-03 |
| 500 | Development_Role of Thyroid hormone in regulation of oligodendrocyte differentiation             | 5.644E-03 | 9.564E-03 | 3.447E-01 | 4.631E-01 | 5.644E-03 | 9.564E-03 |
| 501 | DNA damage_ATM/ATR regulation of G1/S checkpoint                                                 | 5.930E-03 | 1.002E-02 | 5.609E-01 | 6.403E-01 | 5.930E-03 | 1.002E-02 |
| 502 | Reproduction_Progesterone-mediated oocyte maturation                                             | 5.943E-03 | 1.002E-02 | 2.695E-01 | 3.888E-01 | 5.943E-03 | 1.002E-02 |
| 503 | Development_Transcription factors in segregation of hepatocytic lineage                          | 6.590E-03 | 2.551E-02 | 6.590E-03 | 2.551E-02 | 1.649E-02 | 2.583E-02 |
| 504 | Apoptosis and survival_Role of nuclear PI3K in NGF/ TrkA signaling                               | 6.635E-03 | 1.112E-02 | 1.314E-01 | 2.304E-01 | 6.635E-03 | 1.112E-02 |
| 505 | G-protein signaling_K-RAS regulation pathway                                                     | 6.635E-03 | 1.112E-02 | 4.742E-01 | 5.713E-01 | 6.635E-03 | 1.112E-02 |
| 506 | Apoptosis and survival_Apoptotic Activin A signaling                                             | 6.635E-03 | 1.112E-02 | 2.455E-02 | 7.008E-02 | 6.635E-03 | 1.112E-02 |
| 507 | Autophagy_Autophagy                                                                              | 7.080E-03 | 1.183E-02 | 9.274E-03 | 3.421E-02 | 7.080E-03 | 1.183E-02 |
| 508 | Nicotine signaling in chromaffin cells                                                           | 8.057E-03 | 1.341E-02 | 2.884E-01 | 4.101E-01 | 8.057E-03 | 1.341E-02 |
| 509 | Translation_Insulin regulation of translation                                                    | 8.057E-03 | 1.341E-02 | 2.126E-02 | 6.321E-02 | 8.057E-03 | 1.341E-02 |
| 510 | Development_NOTCH1-mediated pathway for NF-KB activity modulation                                | 8.123E-03 | 1.347E-02 | 1.401E-01 | 2.418E-01 | 8.123E-03 | 1.347E-02 |
| 511 | Development_HGF-dependent inhibition of TGF-beta-induced EMT                                     | 8.387E-03 | 1.386E-02 | 2.129E-01 | 3.277E-01 | 8.387E-03 | 1.386E-02 |
| 512 | Oxidative stress_Role of ASK1 under oxidative stress                                             | 8.387E-03 | 1.386E-02 | 1.031E-02 | 3.647E-02 | 8.387E-03 | 1.386E-02 |
| 513 | Signal transduction_PKA signaling                                                                | 8.483E-03 | 1.397E-02 | 1.388E-01 | 2.412E-01 | 8.483E-03 | 1.397E-02 |

|     |                                                                                              |           |           |           |           |           |           |
|-----|----------------------------------------------------------------------------------------------|-----------|-----------|-----------|-----------|-----------|-----------|
| 514 | Development_Oligodendrocyte differentiation from adult stem cells                            | 8.483E-03 | 1.397E-02 | 3.723E-01 | 4.852E-01 | 8.483E-03 | 1.397E-02 |
| 515 | Oxidative stress_Role of Sirtuin1 and PGC1-alpha in activation of antioxidant defense system | 8.532E-03 | 1.400E-02 | 4.520E-01 | 5.584E-01 | 8.532E-03 | 1.400E-02 |
| 516 | Development_Regulation of endothelial progenitor cell differentiation from adult stem cells  | 8.532E-03 | 1.400E-02 | 4.520E-01 | 5.584E-01 | 8.532E-03 | 1.400E-02 |
| 517 | Development_Alpha-1 adrenergic receptors signaling via Cyclic AMP                            | 8.645E-03 | 1.408E-02 | 1.156E-02 | 3.979E-02 | 8.645E-03 | 1.408E-02 |
| 518 | DNA damage_NHEJ mechanisms of DSBs repair                                                    | 8.645E-03 | 1.408E-02 | 3.864E-01 | 4.998E-01 | 8.645E-03 | 1.408E-02 |
| 519 | Development_NOTCH-induced EMT                                                                | 8.645E-03 | 1.408E-02 | 8.255E-02 | 1.703E-01 | 8.645E-03 | 1.408E-02 |
| 520 | Neurophysiological process_GABA-A receptor life cycle                                        | 9.836E-03 | 1.593E-02 | 3.010E-02 | 8.200E-02 | 9.836E-03 | 1.593E-02 |
| 521 | Action of lithium on synaptic transmission and autophagy                                     | 9.863E-03 | 1.593E-02 | 5.936E-01 | 6.565E-01 | 9.863E-03 | 1.593E-02 |
| 522 | Muscle contraction_Oxytocin signaling in uterus and mammary gland                            | 1.073E-02 | 1.729E-02 | 4.689E-01 | 5.712E-01 | 1.073E-02 | 1.729E-02 |
| 523 | TLRs-mediated IFN-alpha production by plasmacytoid dendritic cells in SLE                    | 1.074E-02 | 3.734E-02 | 1.074E-02 | 3.734E-02 | 1.670E-01 | 2.195E-01 |
| 524 | Development_WNT signaling pathway. Part 2                                                    | 1.074E-02 | 3.734E-02 | 1.074E-02 | 3.734E-02 | 7.655E-02 | 1.053E-01 |
| 525 | Regulation of lipid metabolism_Alpha-1 adrenergic receptors signaling via arachidonic acid   | 1.141E-02 | 1.831E-02 | 8.436E-01 | 8.579E-01 | 1.141E-02 | 1.831E-02 |
| 526 | Development_SSTR2 in regulation of cell proliferation                                        | 1.152E-02 | 1.841E-02 | 2.317E-01 | 3.478E-01 | 1.152E-02 | 1.841E-02 |
| 527 | G-protein signaling_G-Protein alpha-s signaling cascades                                     | 1.152E-02 | 1.841E-02 | 2.317E-01 | 3.478E-01 | 1.152E-02 | 1.841E-02 |
| 528 | Immune response_IL-6-induced acute-phase response in hepatocytes                             | 1.258E-02 | 4.206E-02 | 1.258E-02 | 4.206E-02 | 3.791E-02 | 5.552E-02 |
| 529 | Development_Delta-type opioid receptor mediated cardioprotection                             | 1.337E-02 | 2.133E-02 | 6.140E-01 | 6.743E-01 | 1.337E-02 | 2.133E-02 |
| 530 | Cell cycle_Role of SCF complex in cell cycle regulation                                      | 1.401E-02 | 2.227E-02 | 5.256E-01 | 6.172E-01 | 1.401E-02 | 2.227E-02 |
| 531 | Cell cycle_Role of SCF complex in cell cycle regulation                                      | 1.401E-02 | 2.227E-02 | 5.256E-01 | 6.172E-01 | 1.401E-02 | 2.227E-02 |
| 532 | Development_Role of G-CSF in hematopoietic stem cell mobilization                            | 1.529E-02 | 4.921E-02 | 1.529E-02 | 4.921E-02 | 1.806E-01 | 2.364E-01 |
| 533 | Transport_ACM3 signaling in lacrimal glands                                                  | 1.529E-02 | 2.428E-02 | 5.709E-01 | 6.446E-01 | 1.529E-02 | 2.428E-02 |
| 534 | Cytoskeleton remodeling_ACM3 and ACM4 in keratinocyte migration                              | 1.542E-02 | 2.439E-02 | 6.238E-01 | 6.804E-01 | 1.542E-02 | 2.439E-02 |
| 535 | Regulation of lipid metabolism_Insulin regulation of glycogen metabolism                     | 1.546E-02 | 2.441E-02 | 1.691E-01 | 2.795E-01 | 1.546E-02 | 2.441E-02 |
| 536 | Immune response_T regulatory cell-mediated modulation of antigen-presenting cell functions   | 1.636E-02 | 2.580E-02 | 8.613E-02 | 1.758E-01 | 1.636E-02 | 2.580E-02 |
| 537 | Development_S1P4 receptor signaling pathway                                                  | 1.643E-02 | 2.583E-02 | 4.320E-01 | 5.405E-01 | 1.643E-02 | 2.583E-02 |
| 538 | Transcription_Ligand-dependent activation of the ESR1/SP pathway                             | 1.649E-02 | 2.583E-02 | 5.377E-01 | 6.229E-01 | 1.649E-02 | 2.583E-02 |
| 539 | Translation_Regulation of EIF2 activity                                                      | 1.769E-02 | 2.765E-02 | 7.553E-02 | 1.583E-01 | 1.769E-02 | 2.765E-02 |
| 540 | Apoptosis and survival_DNA-damage-induced apoptosis                                          | 1.778E-02 | 2.770E-02 | 3.199E-01 | 4.381E-01 | 1.778E-02 | 2.770E-02 |
| 541 | Development_Astrocyte differentiation from adult stem cells                                  | 1.805E-02 | 5.602E-02 | 1.805E-02 | 5.602E-02 | 5.907E-02 | 8.272E-02 |
| 542 | Development_ERK5 in cell proliferation and neuronal survival                                 | 1.962E-02 | 5.947E-02 | 1.962E-02 | 5.947E-02 | 7.405E-02 | 1.020E-01 |
| 543 | Apoptosis and survival_Beta-2 adrenergic receptor anti-apoptotic action                      | 1.981E-02 | 3.072E-02 | 4.464E-01 | 5.550E-01 | 1.981E-02 | 3.072E-02 |
| 544 | wtCFTR traffic / Sorting endosome formation (normal)                                         | 1.981E-02 | 3.072E-02 | 4.464E-01 | 5.550E-01 | 1.981E-02 | 3.072E-02 |
| 545 | DNA damage_DNA-damage-induced responses                                                      | 2.117E-02 | 3.265E-02 | 2.064E-01 | 3.235E-01 | 2.117E-02 | 3.265E-02 |
| 546 | Transcription_Mechanism of activation of the transcription of Retinoid-target genes          | 2.201E-02 | 6.399E-02 | 2.201E-02 | 6.399E-02 | 5.115E-01 | 6.079E-01 |
| 547 | wtCFTR and deltaF508 traffic / Late endosome and lysosome (normal and CF)                    | 2.242E-02 | 3.446E-02 | 6.085E-02 | 1.359E-01 | 2.242E-02 | 3.446E-02 |
| 548 | Immune response_MIF-JAB1 signaling                                                           | 2.362E-02 | 3.601E-02 | 1.229E-01 | 2.208E-01 | 2.362E-02 | 3.601E-02 |
| 549 | Development_Mu-type opioid receptor signaling via Beta-arrestin                              | 2.362E-02 | 3.601E-02 | 4.605E-01 | 5.635E-01 | 2.362E-02 | 3.601E-02 |
| 550 | CFTR folding and maturation (normal and CF)                                                  | 2.362E-02 | 3.601E-02 | 1.229E-01 | 2.208E-01 | 2.362E-02 | 3.601E-02 |
| 551 | RHS_pathways                                                                                 | 2.520E-02 | 7.166E-02 | 2.520E-02 | 7.166E-02 | 1.530E-01 | 2.030E-01 |
| 552 | Cell adhesion_IL-8-dependent cell migration and adhesion                                     | 2.574E-02 | 3.918E-02 | 2.036E-01 | 3.196E-01 | 2.574E-02 | 3.918E-02 |
| 553 | Development_S1P2 and S1P3 receptors in cell proliferation and differentiation                | 2.725E-02 | 7.556E-02 | 2.725E-02 | 7.556E-02 | 1.062E-01 | 1.424E-01 |
| 554 | Cell adhesion_Endothelial cell contacts by junctional mechanisms                             | 2.725E-02 | 7.556E-02 | 2.725E-02 | 7.556E-02 | 2.755E-01 | 3.480E-01 |
| 555 | LRRK2 in neuronal apoptosis in Parkinson's disease                                           | 2.772E-02 | 4.183E-02 | 3.540E-01 | 4.692E-01 | 2.772E-02 | 4.183E-02 |
| 556 | Transcription_Transcription factor Tubby signaling pathways                                  | 2.772E-02 | 4.183E-02 | 3.540E-01 | 4.692E-01 | 2.772E-02 | 4.183E-02 |

|     |                                                                                                        |           |           |           |           |           |           |
|-----|--------------------------------------------------------------------------------------------------------|-----------|-----------|-----------|-----------|-----------|-----------|
| 557 | Neurophysiological process_Synaptic vesicle fusion and recycling in nerve terminals                    | 2.775E-02 | 4.183E-02 | 3.814E-01 | 4.954E-01 | 2.775E-02 | 4.183E-02 |
| 558 | Immune response_T cell subsets: cell surface markers                                                   | 2.775E-02 | 4.183E-02 | 7.378E-01 | 7.714E-01 | 2.775E-02 | 4.183E-02 |
| 559 | Cytoskeleton remodeling_Neurofilaments                                                                 | 2.787E-02 | 4.193E-02 | 1.314E-01 | 2.304E-01 | 2.787E-02 | 4.193E-02 |
| 560 | Transport_cAMP/ Ca(2+)-dependent Insulin secretion                                                     | 2.910E-02 | 4.372E-02 | 6.693E-01 | 7.111E-01 | 2.910E-02 | 4.372E-02 |
| 561 | Chemotaxis_CCR4-induced chemotaxis of immune cells                                                     | 2.946E-02 | 4.405E-02 | 5.830E-01 | 6.494E-01 | 2.946E-02 | 4.405E-02 |
| 562 | Mechanism of action of CCR4 antagonists in asthma and atopic dermatitis (Variant 1)                    | 2.946E-02 | 4.405E-02 | 5.830E-01 | 6.494E-01 | 2.946E-02 | 4.405E-02 |
| 563 | CCR4-dependent immune cell chemotaxis in asthma and atopic dermatitis                                  | 2.946E-02 | 4.405E-02 | 5.830E-01 | 6.494E-01 | 2.946E-02 | 4.405E-02 |
| 564 | ENaC regulation in normal and CF airways                                                               | 3.075E-02 | 4.590E-02 | 1.507E-01 | 2.567E-01 | 3.075E-02 | 4.590E-02 |
| 565 | Cell adhesion_Plasmin signaling                                                                        | 3.351E-02 | 4.963E-02 | 2.223E-01 | 3.382E-01 | 3.351E-02 | 4.963E-02 |
| 566 | Development_Regulation of telomere length and cellular immortalization                                 | 3.351E-02 | 4.963E-02 | 5.817E-02 | 1.315E-01 | 3.351E-02 | 4.963E-02 |
| 567 | Neurophysiological process_EphB receptors in dendritic spine morphogenesis and synaptogenesis          | 3.351E-02 | 4.963E-02 | 5.817E-02 | 1.315E-01 | 3.351E-02 | 4.963E-02 |
| 568 | Beta-adrenergic-dependent CFTR expression                                                              | 3.371E-02 | 4.984E-02 | 3.704E-01 | 4.835E-01 | 3.371E-02 | 4.984E-02 |
| 569 | Transport_Macropinocytosis                                                                             | 3.575E-02 | 9.136E-02 | 3.575E-02 | 9.136E-02 | 2.050E-01 | 2.632E-01 |
| 570 | Epigenetics_Default                                                                                    | 3.662E-02 | 5.388E-02 | 2.962E-01 | 4.182E-01 | 3.662E-02 | 5.388E-02 |
| 571 | Set A_deregulated_mechanisms                                                                           | 3.953E-02 | 9.814E-02 | 3.953E-02 | 9.814E-02 | 8.884E-01 | 9.655E-01 |
| 572 | Schema: Initiation of T cell recruitment in allergic contact dermatitis                                | 4.040E-02 | 5.907E-02 | 8.255E-02 | 1.703E-01 | 4.040E-02 | 5.907E-02 |
| 573 | Muscle contraction_Regulation of eNOS activity in cardiomyocytes                                       | 4.104E-02 | 5.992E-02 | 4.172E-01 | 5.271E-01 | 4.104E-02 | 5.992E-02 |
| 574 | Development_Retinoic acid and retinoic acid receptors in regulation of oligodendrocyte differentiation | 4.266E-02 | 6.199E-02 | 2.411E-01 | 3.585E-01 | 4.266E-02 | 6.199E-02 |
| 575 | Development_MAG-dependent inhibition of neurite outgrowth                                              | 4.266E-02 | 6.199E-02 | 2.411E-01 | 3.585E-01 | 4.266E-02 | 6.199E-02 |
| 576 | Development_Beta-adrenergic receptors transactivation of EGFR                                          | 4.266E-02 | 6.199E-02 | 6.659E-02 | 1.450E-01 | 4.266E-02 | 6.199E-02 |
| 577 | DeltaF508-CFTR traffic / Sorting endosome formation in CF                                              | 4.337E-02 | 6.272E-02 | 5.133E-01 | 6.081E-01 | 4.337E-02 | 6.272E-02 |
| 578 | Possible influence of low doses of Arsenite on glucose uptake in muscle                                | 4.337E-02 | 6.272E-02 | 5.133E-01 | 6.081E-01 | 4.337E-02 | 6.272E-02 |
| 579 | Neurophysiological process_Dopamine D2 receptor signaling in CNS                                       | 4.466E-02 | 6.428E-02 | 7.017E-01 | 7.376E-01 | 4.466E-02 | 6.428E-02 |
| 580 | Mechanisms of deltaF508 CFTR activation by S-nitrosoglutathione                                        | 4.466E-02 | 6.428E-02 | 3.354E-01 | 4.561E-01 | 4.466E-02 | 6.428E-02 |
| 581 | Development_Role of nicotinamide in G-CSF-induced granulopoiesis                                       | 4.735E-02 | 6.795E-02 | 2.653E-01 | 3.850E-01 | 4.735E-02 | 6.795E-02 |
| 582 | wtCFTR and deltaF508-CFTR traffic / Generic schema (normal and CF)                                     | 4.777E-02 | 6.825E-02 | 2.506E-01 | 3.676E-01 | 4.777E-02 | 6.825E-02 |
| 583 | Regulation of degradation of wtCFTR                                                                    | 4.778E-02 | 6.825E-02 | 4.020E-01 | 5.145E-01 | 4.778E-02 | 6.825E-02 |
| 584 | Cytoskeleton remodeling_Role of Activin A in cytoskeleton remodeling                                   | 4.778E-02 | 6.825E-02 | 4.020E-01 | 5.145E-01 | 4.778E-02 | 6.825E-02 |
| 585 | Development_SSTR1 in regulation of cell proliferation and migration                                    | 4.949E-02 | 7.058E-02 | 5.256E-01 | 6.172E-01 | 4.949E-02 | 7.058E-02 |
